# Supplementary material for: Copper-catalyzed monoselective C–H amination of ferrocenes with alkylamines
Source: publisher site journal article supplement (doi:10.3762/bjoc.17.165), 2021-09-28

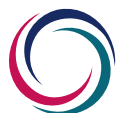

## Supporting Information

for

### **Copper-catalyzed monoselective C–H amination of ferrocenes with alkylamines**

Zhen-Sheng Jia, Qiang Yue, Ya Li, Xue-Tao Xu, Kun Zhang and Bing-Feng Shi

*Beilstein J. Org. Chem.* **2021**, *17*, 2488–2495. doi:10.3762/bjoc.17.165

**Full experimental details, compound characterization, and  
copies of NMR spectra**

## Table of contents

|                                                                                                           |     |
|-----------------------------------------------------------------------------------------------------------|-----|
| 1. General information.....                                                                               | S2  |
| 2. Structure of substrates .....                                                                          | S3  |
| 3. Experimental section .....                                                                             | S4  |
| 4. Screening of reaction conditions.....                                                                  | S17 |
| 5. General procedures for Cu-catalyzed monoselective C–H amination of ferrocenes with<br>alkylamines..... | S21 |
| 6. Gram-scale synthesis .....                                                                             | S38 |
| 7. Removal of directing group. ....                                                                       | S39 |
| 8. Mechanistic experiments.....                                                                           | S40 |
| 9. References. ....                                                                                       | S43 |
| 10. NMR spectra. ....                                                                                     | S44 |

## 1. General information

All the materials and solvents were purchased from commercial suppliers and used without additional purification. CuI was purchased from Strem. NMR spectra were recorded on a Bruker Avance operating for  $^1\text{H}$  NMR at 400 MHz,  $^{13}\text{C}$  NMR at 100 MHz using TMS as internal standard. The peaks were internally referenced to  $\text{CDCl}_3$  (7.26 ppm) or residual undeuterated solvent signal of  $\text{CDCl}_3$  (77.16 ppm for  $^{13}\text{C}$  NMR). The following abbreviations (or combinations thereof) were used to explain multiplicities: s = singlet, d = doublet, t = triplet, m = multiplet, brs = broad singlet. Mass spectroscopy data of the products were collected on an HRMS-TOF instrument using ESI ionization.

## 2. Structure of substrates

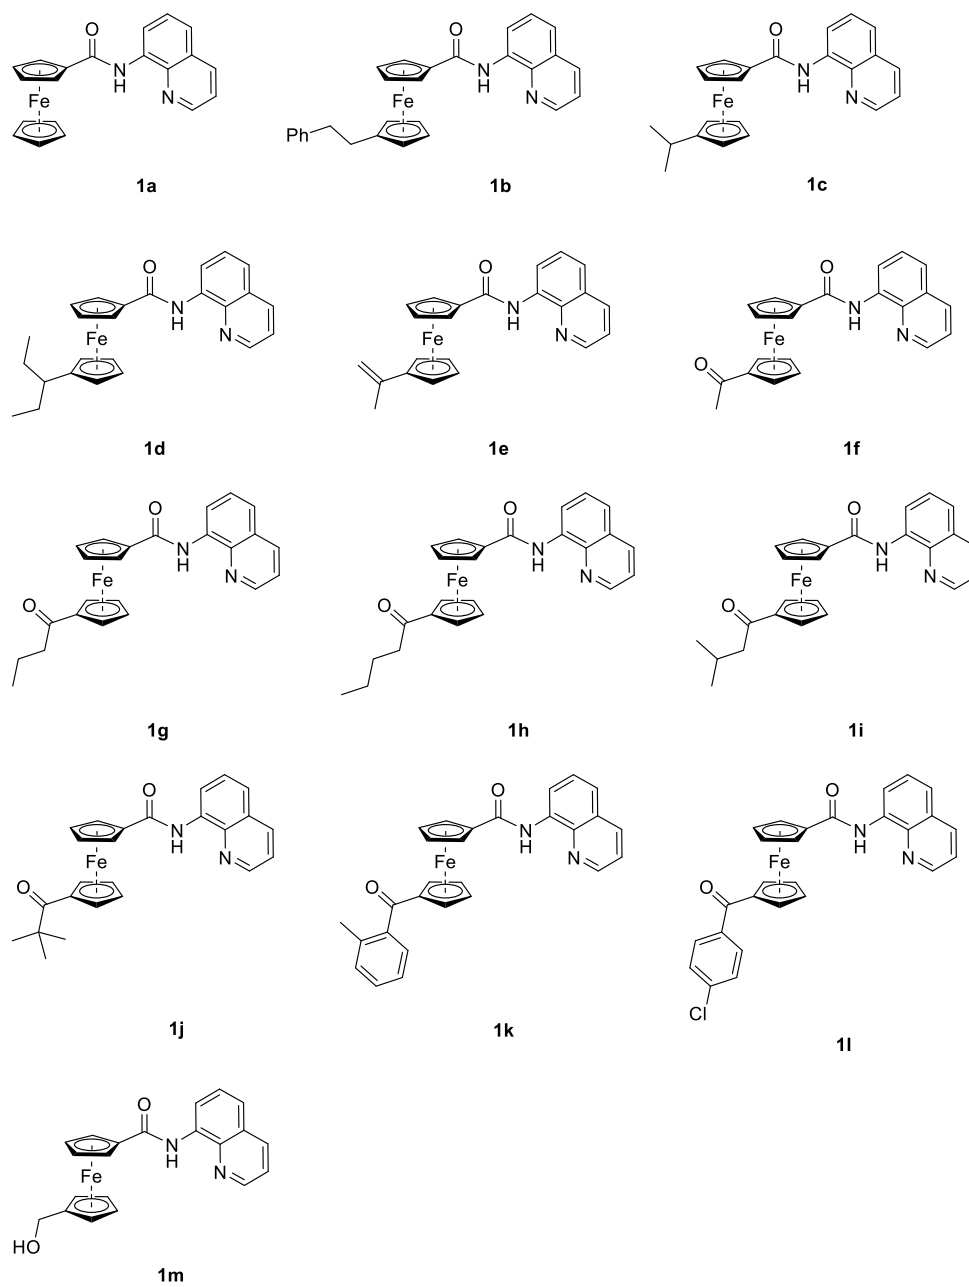

**Figure S1:** Ferrocene substrates



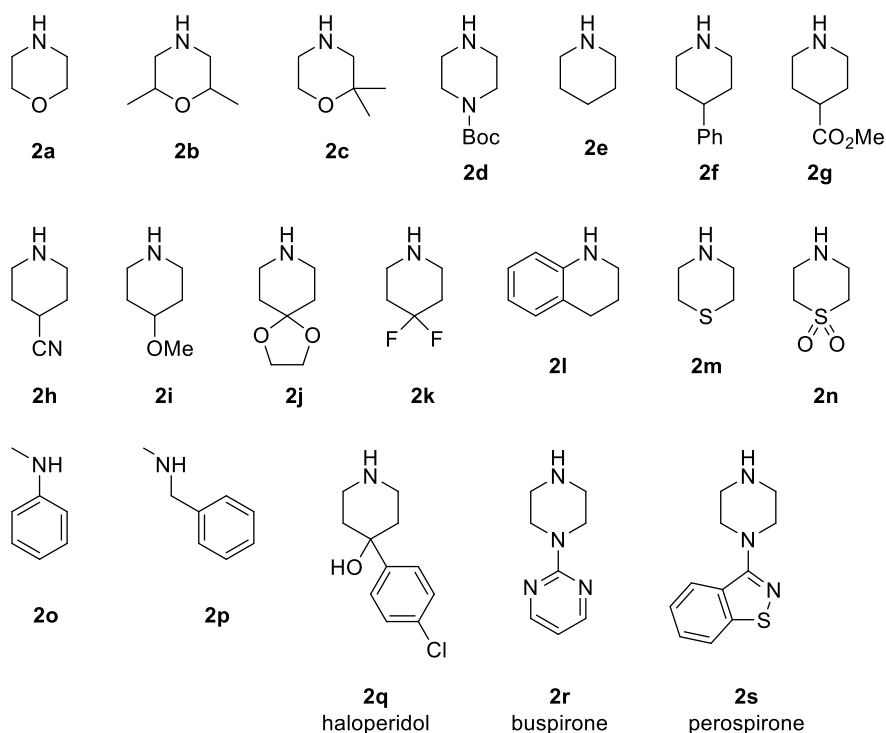

**Figure S2:** Secondary amines

### 3. Experimental section

#### 3-1. Preparation of substrates

Substrate **1a** is a known compound and was prepared according to the literature.<sup>[1]</sup> Substrates **1b–m** were prepared following the literature procedure. Amines **2a–s** are commercially available. All other starting materials, solvents and reagents were purchased and used as received.

#### General procedure 1 (for the preparation of 1f–l):

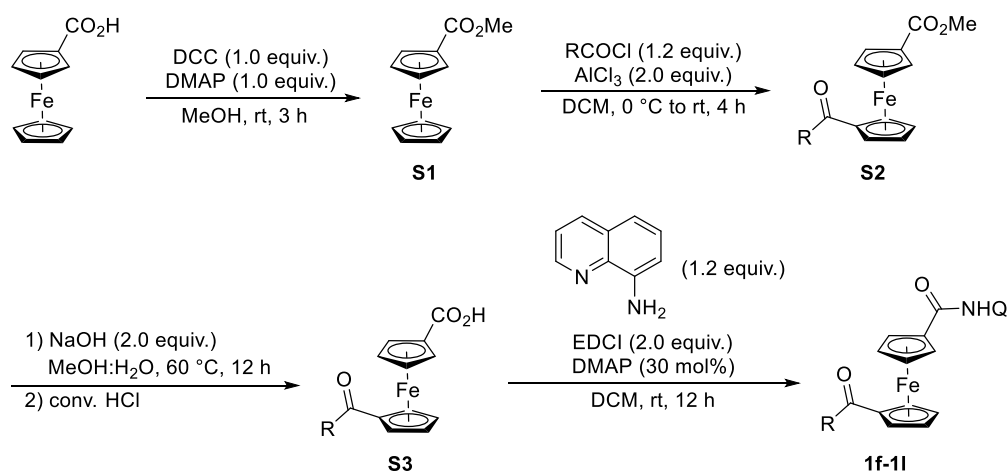

*N,N'*-Dicyclohexylcarbodiimide (DCC, 5.0 mmol, 0.91 g) and 4-dimethylaminopyridine (DMAP, 5.0 mmol, 0.54 g) were added to the solution of ferrocenecarboxylic acid (5.0 mmol, 1.01 g) in dry MeOH (20 mL). The reaction mixture was flushed with argon and stirred at room temperature for 3 h. The reaction mixture was concentrated and the residue was purified by flash chromatography on silica gel (ethyl acetate/hexanes = 1/9) to give ferrocenecarboxylic acid methyl ester **S1**<sup>[2]</sup> as orange crystals.

Acetyl chloride (0.43 mL, 6.0 mmol) was added to a suspension of anhydrous aluminum chloride (1.33 g, 10 mmol) in CH<sub>2</sub>Cl<sub>2</sub> (12 mL) at 0 °C and stirred for 15 min. The mixture was then added to a solution of methyl ferrocene-1-carboxylate (1.0 g, 5.0 mmol) in CH<sub>2</sub>Cl<sub>2</sub> (23 mL) at 0 °C over a period of 15 min upon stirring under nitrogen atmosphere. To prevent light-induced degradation, the flask was covered with aluminum foil during the reaction. After 4 h, the reaction mixture was poured into ice water and the resulting precipitate was solubilized by addition of concentrated HCl. The organic layer was separated, and the aqueous layer was extracted with CH<sub>2</sub>Cl<sub>2</sub>. The combined organic layers were dried (MgSO<sub>4</sub>) and evaporated to give **S2**<sup>[3]</sup> as orange solid.

A solution of the ester **S2** (3.0 mmol) in 15 mL of methanol and 15 mL of 20% NaOH (aq.) was heated under reflux for 12 h. The reaction mixture was cooled and acidified with 5 mL of 20% HCl in an ice bath and then stirred vigorously for a few minutes to make the free acid from the sodium salt. The product was collected by suction filtration, washed with 10 mL of water, and dried. Crude ferrocene carboxylic acid **S3** was obtained and used directly for the next step.

Following a reported procedure:<sup>[4]</sup> In a 50 mL Round-bottomed flask, to a solution of **S3** (3.0 mmol), 8-aminoquinoline (3.6 mmol), and DMAP (111 mg, 0.9 mmol) in anhydrous CH<sub>2</sub>Cl<sub>2</sub> (15 mL) was added a solution of *N*-ethyl-*N'*-(3-dimethylaminopropyl)carbodiimide hydrochloride (EDCI, 1.15 g, 6 mmol) in CH<sub>2</sub>Cl<sub>2</sub> (15 mL) through a dropping funnel at 0 °C under N<sub>2</sub> atmosphere. The reaction mixture was stirred at rt overnight. After completion, the mixture was quenched with NaHCO<sub>3</sub> (10 mL) and diluted with CH<sub>2</sub>Cl<sub>2</sub> (50 mL). The organic layer was washed with aq. 1 N HCl (50 mL), followed by aq. NaHCO<sub>3</sub> (50 mL), aq. NaCl (50 mL), and dried with anhydrous Na<sub>2</sub>SO<sub>4</sub>. The solvent was concentrated and the resulting residue was purified by column chromatography using EtOAc/hexane as eluent to afford the desired product **1f-I** as an orange solid.

## General procedure 2 (for the preparation of 1c and 1d):

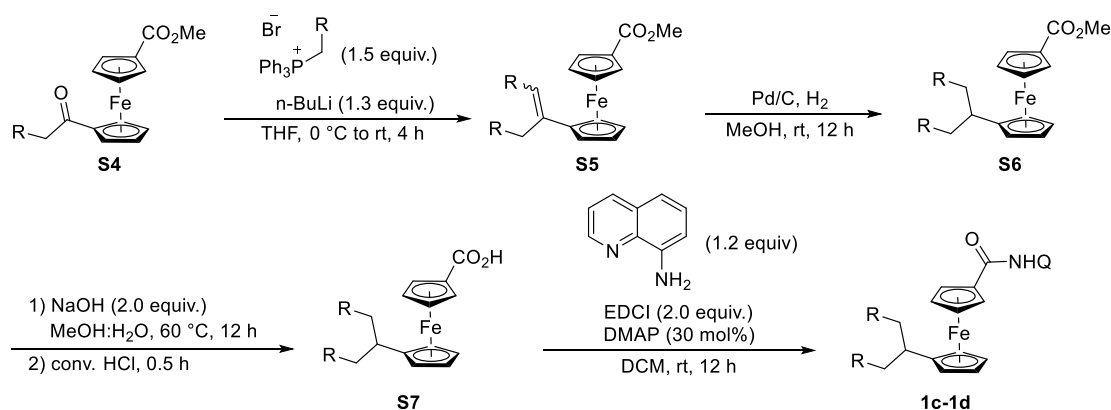

To an oven dried round bottom flask equipped with a stir bar under a N<sub>2</sub>(g) atmosphere was added PPh<sub>3</sub>MeBr (1.50 equiv). The flask was evacuated and back filled with N<sub>2</sub>(g) and dry THF (0.1 M) was added. The resultant mixture was cooled to −78 °C, to which a solution of n-BuLi in hexanes (1.6 M, 1.3 equiv) was added. The solution was allowed to warm to rt and stirred for 30 mins before ketone substrate **S4** was added (1.0 equiv). The reaction was allowed to stir at rt for 4 h before being diluted with hexane and quenched with H<sub>2</sub>O. The aqueous layer was separated and washed with hexane (3 × 30 mL). The organic layers were combined, dried (Na<sub>2</sub>SO<sub>4</sub>), filtered and concentrated in vacuo. The resultant crude alkyferrocenes **S5** were purified via column chromatography

To a solution of **S5** (4 mmol, 1 equiv) in MeOH (20 mL) was added Pd/C (10 wt %) and the suspension was equipped with H<sub>2</sub> (1 atm) several times. After stirring at rt. for 12 h, the reaction mixture was filtered and the filtrate was concentrated to afford the title compound **S6** as orange oil and used directly in the next step.

A solution of the ester **S6** (3.0 mmol) in 15 mL of methanol and 15 mL of 20% NaOH (aq.) was heated under reflux for 12 h. The reaction mixture was cooled and acidified with 5 mL of 20% HCl in an ice bath and then stirred vigorously for a few minutes to make free acid from the sodium salt. The product was collected by suction filtration at room temperature, washed with 10 mL of water, and dried. Pure 8-ferrocenyl-8-oxooctanoic acid **S7** as red solid.

Following a reported procedure:<sup>[4]</sup> In a 50 mL Round-bottomed flask, to a solution of **S7** (3.0 mmol), 8-aminoquinoline (3.6 mmol), and DMAP (111 mg, 0.9 mmol) in anhydrous CH<sub>2</sub>Cl<sub>2</sub> (15 mL) was added a solution of *N*-ethyl-*N'*-(3-dimethylaminopropyl)carbodiimide hydrochloride (EDCI, 1.15 g, 6 mmol) in CH<sub>2</sub>Cl<sub>2</sub> (15 mL) through a dropping funnel at 0 °C under N<sub>2</sub> atmosphere. The reaction mixture was stirred at rt overnight. After completion, the mixture was quenched with

NaHCO<sub>3</sub> (10 mL) and diluted with CH<sub>2</sub>Cl<sub>2</sub> (50 mL). The organic layer was washed with aq. 1 N HCl (50 mL), followed by aq. NaHCO<sub>3</sub> (50 mL), aq. NaCl (50 mL), and dried with anhydrous Na<sub>2</sub>SO<sub>4</sub>. The solvent was concentrated and the resulting residue was purified by column chromatography using EtOAc/hexane as eluent to afford the desired product **1c/1d** as an orange solid.

### **General procedure 3:**

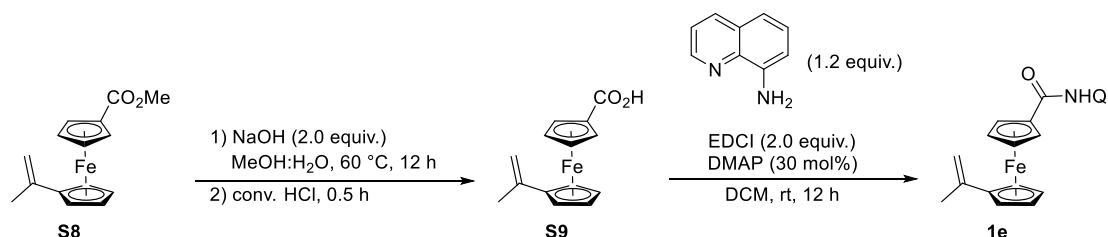

A solution of the ester **S8** (0.85 g, 3.0 mmol) in 15 mL of methanol and 15 mL of 20% NaOH (aq.) was heated under reflux for 12 h. The reaction mixture was cooled and acidified with 5 mL of 20% HCl in an ice bath and then stirred vigorously for a few minutes to make free acid from the sodium salt. The product **S9** was collected by suction filtration at room temperature, washed with 10 mL of water, and dried.

Following a reported procedure:<sup>[4]</sup> In a 50 mL Round-bottomed flask, to a solution of **S9** (3.0 mmol), 8-aminoquinoline (3.6 mmol), and DMAP (111 mg, 0.9 mmol) in anhydrous CH<sub>2</sub>Cl<sub>2</sub> (15 mL) was added a solution of *N*-ethyl-*N'*-(3-dimethylaminopropyl)carbodiimide hydrochloride (EDCI, 1.15 g, 6 mmol) in CH<sub>2</sub>Cl<sub>2</sub> (15 mL) through a dropping funnel at 0 °C under N<sub>2</sub> atmosphere. The reaction mixture was stirred at rt overnight. After completion, the mixture was quenched with NaHCO<sub>3</sub> (10 mL) and diluted with CH<sub>2</sub>Cl<sub>2</sub> (50 mL). The organic layer was washed with aq. 1 N HCl (50 mL), followed by aq. NaHCO<sub>3</sub> (50 mL), aq. NaCl (50 mL), and dried with anhydrous Na<sub>2</sub>SO<sub>4</sub>. The solvent was concentrated and the resulting residue was purified by column chromatography using EtOAc/hexane as eluent to afford the desired product **1e** as a yellow solid.

#### General Procedure 4:

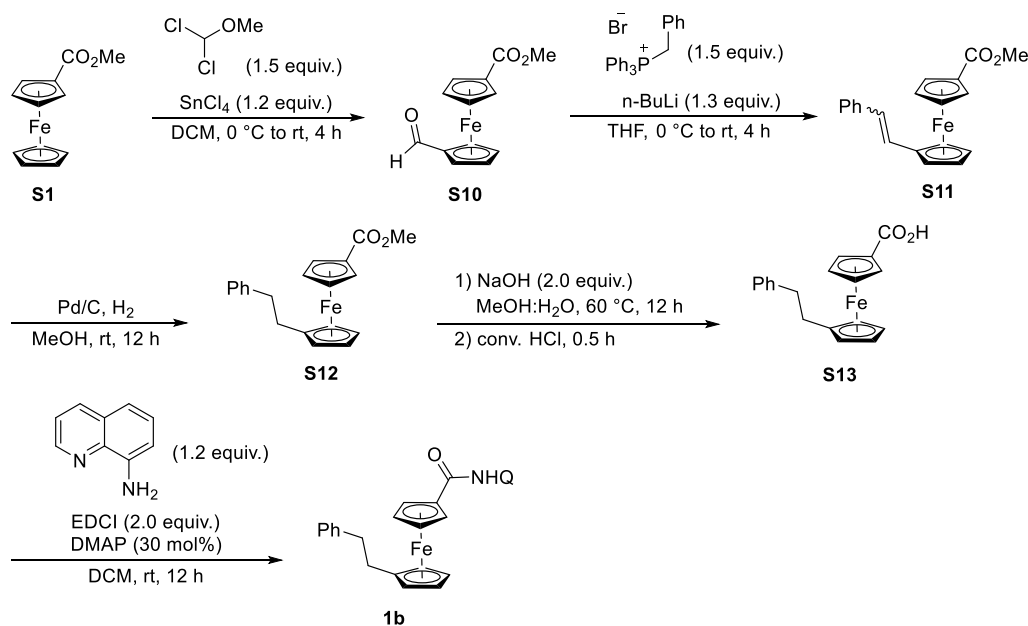

1,1-Dichlorodimethyl ether (15 mmol) was added at  $0^\circ\text{C}$  to a suspension of anhydrous tin tetrachloride (12 mmol) in  $\text{CH}_2\text{Cl}_2$  (12 mL) and stirred for 15 min. The mixture was then added at  $0^\circ\text{C}$  to a solution of **S1** (2.4 g, 10 mmol) in  $\text{CH}_2\text{Cl}_2$  (23 mL) over a period of 15 min upon stirring under nitrogen atmosphere. After 4 h, the reaction mixture was poured into ice water and the resulting precipitate was solubilized by addition of concentrated HCl. The organic layer was separated, and the aqueous layer was extracted with  $\text{CH}_2\text{Cl}_2$ . The combined organic layers were dried ( $\text{MgSO}_4$ ) and evaporated under reduced pressure to give **S10** as an orange solid.

To an oven dried round bottom flask equipped with a stir bar under a  $\text{N}_2(\text{g})$  atmosphere was added  $\text{PPh}_3\text{BnBr}$  (1.50 equiv). The flask was evacuated and back filled with  $\text{N}_2(\text{g})$  and dry THF (0.1 M) was added. The resultant mixture was cooled to  $-78^\circ\text{C}$  to which a solution of  $n\text{-BuLi}$  in hexanes (1.6M, 1.3 equiv) was added. The solution was allowed to warm to rt and stirred for 30 mins before the crude **S10** was added (1.0 equiv). The reaction was allowed to stir at rt for 4 h before diluted with hexane and quenched with  $\text{H}_2\text{O}$ . The aqueous layer was separated and washed with hexane ( $3 \times 30\text{ mL}$ ). The organic layers were combined, dried ( $\text{Na}_2\text{SO}_4$ ), filtered and concentrated in vacuo. The resultant crude alkenes were purified *via* column chromatography, afford the desired **S11** as an orange solid.

To a solution of **S11** (4 mmol, 1 equiv) in MeOH (20 mL) was added Pd/C (10 wt %) and the

suspension was equipped with H<sub>2</sub> (1 atm) several times. After stirring at rt. for 12 h, the reaction mixture was filtered and the filtrate was concentrated to afford the title compound **S12** as an orange oil and used directly in the next step.

A solution of the ester **S12** (1.04 g, 3.0 mmol) in 15 mL of methanol and 15 mL of 20% NaOH (aq.) was heated under reflux for 12 h. The reaction mixture was cooled and acidified with 5 mL of 20% HCl in an ice bath and then stirred vigorously for a few minutes to make free acid from the sodium salt. The crude product **S13** was collected by suction filtration at room temperature, washed with 10 mL of water, and dried.

Following a reported procedure:<sup>[4]</sup> In a 50 mL Round-bottomed flask, to a solution of **S13** (3.0 mmol), 8-aminoquinoline (3.6 mmol), and DMAP (111 mg, 0.9 mmol) in anhydrous CH<sub>2</sub>Cl<sub>2</sub> (15 mL) was added a solution of *N*-ethyl-*N'*-(3-dimethylaminopropyl)carbodiimide hydrochloride (EDCI, 1.15 g, 6 mmol) in CH<sub>2</sub>Cl<sub>2</sub> (15 mL) through a dropping funnel at 0 °C under N<sub>2</sub> atmosphere. The reaction mixture was stirred at rt overnight. After completion, the mixture was quenched with NaHCO<sub>3</sub> (10 mL) and diluted with CH<sub>2</sub>Cl<sub>2</sub> (50 mL). The organic layer was washed with aq. 1 N HCl (50 mL), followed by aq. NaHCO<sub>3</sub> (50 mL), aq. NaCl (50 mL), and dried with anhydrous Na<sub>2</sub>SO<sub>4</sub>. The solvent was concentrated and the resulting residue was purified by column chromatography using EtOAc/hexane as eluent to afford the desired product **1b** as an orange solid.

### General Procedure 5:

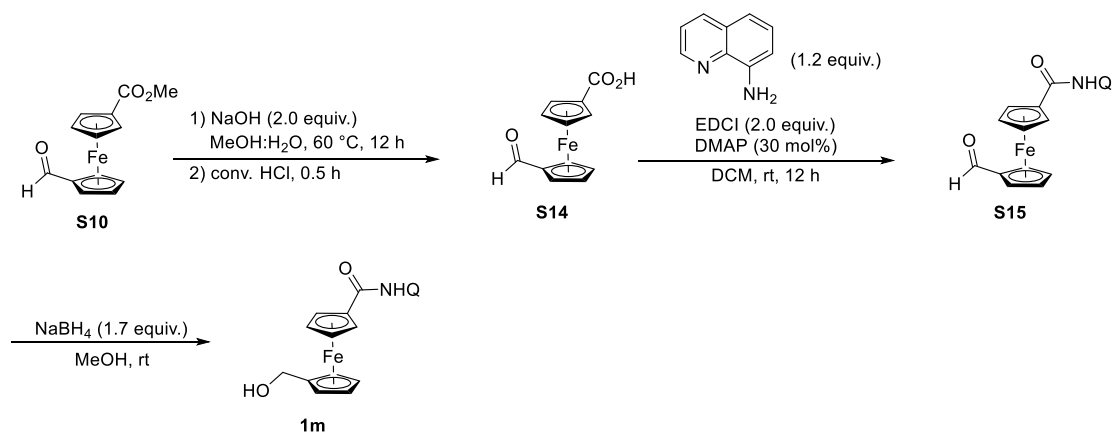

A solution of the ester **S10** (0.82 g, 3.0 mmol) in 15 mL of methanol and 15 mL of 20% NaOH (aq.) was heated under reflux for 12 h. The reaction mixture was cooled and acidified with 5 mL of 20% HCl in an ice bath and then stirred vigorously for a few minutes to make free acid from the sodium salt. The crude product **S14** was collected by suction filtration at room temperature, washed

with 10 mL of water, and dried.

Following a reported procedure:<sup>[4]</sup> In a 50 mL Round-bottomed flask, to a solution of **S14** (3.0 mmol), 8-aminoquinoline (3.6 mmol), and DMAP (111 mg, 0.9 mmol) in anhydrous CH<sub>2</sub>Cl<sub>2</sub> (15 mL) was added a solution of *N*-ethyl-*N'*-(3-dimethylaminopropyl)carbodiimide hydrochloride (EDCI, 1.15 g, 6 mmol) in CH<sub>2</sub>Cl<sub>2</sub> (15 mL) through a dropping funnel at 0 °C under N<sub>2</sub> atmosphere. The reaction mixture was stirred at rt overnight. After completion, the mixture was quenched with NaHCO<sub>3</sub> (10 mL) and diluted with CH<sub>2</sub>Cl<sub>2</sub> (50 mL). The organic layer was washed with aq. 1 N HCl (50 mL), followed by aq. NaHCO<sub>3</sub> (50 mL), aq. NaCl (50 mL), and dried with anhydrous Na<sub>2</sub>SO<sub>4</sub>. The solvent was concentrated and the resulting residue was purified by column chromatography using EtOAc/hexane as eluent to afford the desired product **S15** as a yellow solid.

To a solution of compound **S15** (3 mmol) in methanol (10 mL) was added NaBH<sub>4</sub> (0.2 g, 5 mmol). After stirring for 1 h while cooled with an ice-water bath, methanol was evaporated and the residue was dissolved in EtOAc (50 mL). The organic layer was washed with water (3 × 30 mL) and brine (3 × 30 mL), and dried over MgSO<sub>4</sub>. The volatiles were removed to give pure **1m** as a yellow solid.

#### **1-((8-Quinolinylamino)carbonyl)-1'-phenethyl-ferrocene (2b)**

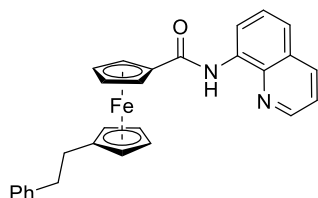

Substrate **2b** was synthesized according to **General Procedure 4**; orange solid.

**<sup>1</sup>H NMR (400 MHz, Chloroform-*d*)**  $\delta$  10.26 (s, 1H), 8.85 – 8.79 (m, 1H), 8.77 (dd, *J* = 4.2, 1.6 Hz, 1H), 8.18 (dd, *J* = 8.2, 1.6 Hz, 1H), 7.57 (t, *J* = 7.8 Hz, 1H), 7.51 (d, *J* = 8.1 Hz, 1H), 7.46 (dd, *J* = 8.3, 4.2 Hz, 1H), 7.17 (m, *J* = 7.8, 6.9, 3.7 Hz, 3H), 7.06 – 7.00 (m, 2H), 4.91 (s, 2H), 4.43 (s, 2H), 4.19 (d, *J* = 1.9 Hz, 2H), 4.14 (d, *J* = 2.0 Hz, 2H), 2.74 (m, *J* = 9.3, 5.5 Hz, 2H), 2.65 (m, *J* = 10.2, 6.2 Hz, 2H).

**<sup>13</sup>C NMR (100 MHz, CDCl<sub>3</sub>)**  $\delta$  169.1, 148.4, 141.9, 138.6, 136.5, 134.9, 128.4, 128.3, 128.2, 127.7, 125.9, 121.7, 121.1, 116.3, 90.4, 71.6, 70.1, 69.3, 69.2, 37.6, 30.7.

**HRMS (ESI)** *m/z*: [M + Na]<sup>+</sup> Calcd for C<sub>28</sub>H<sub>24</sub>FeN<sub>2</sub>ONa 483.1130; found:483.1133.

**1-((8-Quinolinylamino)carbonyl)-1'-isopropyl-ferrocene (2c)**

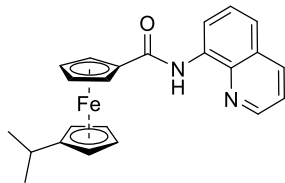

Substrate **2c** was synthesized according to **General Procedure 2**; orange solid.

**<sup>1</sup>H NMR (400 MHz, Chloroform-*d*)**  $\delta$  10.28 (d,  $J$  = 4.7 Hz, 1H), 8.95 – 8.84 (m, 1H), 8.82 (dd,  $J$  = 7.8, 3.4 Hz, 1H), 8.19 (d,  $J$  = 8.0, 2.4, 1.9 Hz, 1H), 7.64 – 7.53 (m, 1H), 7.49 (m,  $J$  = 12.4, 3.8 Hz, 2H), 4.92 (p,  $J$  = 2.4, 1.9 Hz, 2H), 4.44 (p,  $J$  = 2.2 Hz, 2H), 4.21 (p,  $J$  = 2.1, 1.7 Hz, 2H), 4.15 (p,  $J$  = 2.2 Hz, 2H), 2.67 (m,  $J$  = 10.1, 8.9, 7.1, 4.9 Hz, 1H), 1.22 – 1.13 (m, 6H).

**<sup>13</sup>C NMR (100 MHz, CDCl<sub>3</sub>)**  $\delta$  169.3, 148.3, 138.6, 136.5, 134.9, 128.2, 127.7, 121.7, 121.0, 116.2, 98.8, 71.5, 69.3, 69.0, 68.1, 27.3, 23.7.

**HRMS (ESI)**  $m/z$ : [M + H]<sup>+</sup> Calcd for C<sub>23</sub>H<sub>23</sub>FeN<sub>2</sub>O 399.1082; found: 399.1153.

**1-((8-Quinolinylamino)carbonyl)-1'-pentan-3-ferrocene (2d)**

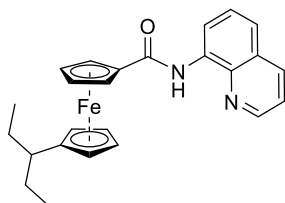

Substrate **2d** was synthesized according to **General Procedure 2**; orange solid.

**<sup>1</sup>H NMR (400 MHz, Chloroform-*d*)**  $\delta$  10.27 (s, 1H), 8.87 (dt,  $J$  = 4.2, 1.4 Hz, 1H), 8.82 (dd,  $J$  = 7.6, 1.3 Hz, 1H), 8.18 (d,  $J$  = 8.3, 1.3 Hz, 1H), 7.57 (t,  $J$  = 7.9 Hz, 1H), 7.53 – 7.49 (m, 1H), 7.49 – 7.43 (m, 1H), 4.89 (q,  $J$  = 1.6 Hz, 2H), 4.41 (q,  $J$  = 1.5 Hz, 2H), 4.20 (q,  $J$  = 1.5 Hz, 2H), 4.11 (q,  $J$  = 1.5 Hz, 2H), 2.27 (q,  $J$  = 7.2, 6.3 Hz, 1H), 1.65 – 1.57 (m, 2H), 1.49 (m,  $J$  = 14.0, 7.2 Hz, 2H), 0.79 (t,  $J$  = 7.4 Hz, 6H).

**<sup>13</sup>C NMR (100 MHz, CDCl<sub>3</sub>)**  $\delta$  169.3, 148.3, 138.7, 136.5, 135.0, 128.2, 127.7, 121.7, 121.0, 116.2, 97.1, 71.6, 69.1, 69.1, 69.0, 40.3, 26.7, 11.3.

**HRMS (ESI)**  $m/z$ : [M + Na]<sup>+</sup> Calcd for C<sub>25</sub>H<sub>26</sub>FeN<sub>2</sub>ONa 449.1287; found: 449.1288.



**1-((8-Quinolinylamino)carbonyl)-1'-2-methyl-1-ene-ferrocene (2e)**

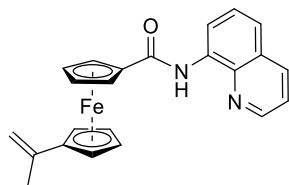

Substrate **2e** was synthesized according to **General Procedure 3**; yellow solid.

**<sup>1</sup>H NMR (400 MHz, Chloroform-*d*)**  $\delta$  10.22 (s, 1H), 8.88 (dd,  $J$  = 4.2, 1.7 Hz, 1H), 8.83 (dd,  $J$  = 7.6, 1.4 Hz, 1H), 8.19 (dd,  $J$  = 8.2, 1.6 Hz, 1H), 7.58 (t,  $J$  = 7.9 Hz, 1H), 7.53 – 7.46 (m, 2H), 5.10 (s, 1H), 4.88 (t,  $J$  = 1.9 Hz, 2H), 4.76 (m,  $J$  = 1.6 Hz, 1H), 4.49 (t,  $J$  = 1.9 Hz, 2H), 4.40 (t,  $J$  = 1.8 Hz, 2H), 4.34 (t,  $J$  = 1.9 Hz, 2H), 2.05 – 1.98 (m, 3H).

**<sup>13</sup>C NMR (100 MHz, CDCl<sub>3</sub>)**  $\delta$  168.9, 148.2, 139.9, 138.6, 136.4, 134.8, 128.1, 127.6, 121.7, 121.0, 116.2, 110.1, 88.2, 72.3, 70.7, 69.7, 67.5, 21.5.

**HRMS (ESI)**  $m/z$ : [M + Na]<sup>+</sup> Calcd for C<sub>23</sub>H<sub>20</sub>FeN<sub>2</sub>ONa 419.0817; found: 419.0817.

**1-((8-Quinolinylamino)carbonyl)-1'-acetyl-ferrocene (2f)**

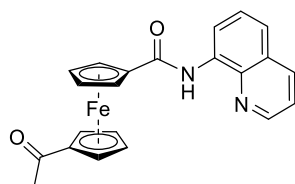

Substrate **2f** was synthesized according to **General Procedure 1**; orange solid.

**<sup>1</sup>H NMR (400 MHz, Chloroform-*d*)**  $\delta$  10.26 (s, 1H), 8.89 (dd,  $J$  = 4.2, 1.6 Hz, 1H), 8.81 (dd,  $J$  = 7.4, 1.5 Hz, 1H), 8.20 (dd,  $J$  = 8.2, 1.6 Hz, 1H), 7.63 – 7.53 (m, 2H), 7.50 (dd,  $J$  = 8.3, 4.2 Hz, 1H), 4.99 (t,  $J$  = 1.9 Hz, 2H), 4.86 (t,  $J$  = 1.9 Hz, 2H), 4.60 (t,  $J$  = 1.9 Hz, 2H), 4.49 (t,  $J$  = 1.9 Hz, 2H), 2.39 (s, 3H).

**<sup>13</sup>C NMR (100 MHz, CDCl<sub>3</sub>)**  $\delta$  201.8, 167.6, 148.5, 138.6, 136.6, 134.5, 128.2, 127.7, 121.9, 121.6, 116.5, 80.7, 78.6, 74.2, 72.8, 71.3, 70.1, 27.8.

**HRMS (ESI)**  $m/z$ : [M + H]<sup>+</sup> Calcd for C<sub>22</sub>H<sub>19</sub>FeN<sub>2</sub>O<sub>2</sub> 399.0718; found: 399.0708.

**1-((8-Quinolinylamino)carbonyl)-1'-butyryl-ferrocene (2g)**

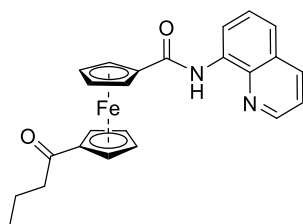

Substrate **2g** was synthesized according to **General Procedure 1**; orange solid.

**<sup>1</sup>H NMR (400 MHz, Chloroform-*d*)**  $\delta$  10.26 (s, 1H), 8.89 (dd,  $J$  = 4.2, 1.7 Hz, 1H), 8.82 (dd,  $J$  = 7.4, 1.6 Hz, 1H), 8.20 (dd,  $J$  = 8.3, 1.7 Hz, 1H), 7.62 – 7.53 (m, 2H), 7.50 (dd,  $J$  = 8.3, 4.2 Hz, 1H), 4.98 (t,  $J$  = 1.9 Hz, 2H), 4.87 (t,  $J$  = 1.9 Hz, 2H), 4.58 (t,  $J$  = 2.0 Hz, 2H), 4.48 (t,  $J$  = 1.9 Hz, 2H), 2.67 (t,  $J$  = 7.4 Hz, 2H), 1.64 (d,  $J$  = 7.3 Hz, 2H), 0.86 (t,  $J$  = 7.4 Hz, 3H).

**<sup>13</sup>C NMR (100 MHz, CDCl<sub>3</sub>)**  $\delta$  204.1, 167.6, 148.5, 138.6, 136.5, 134.5, 128.2, 127.6, 121.9, 121.5, 116.4, 80.6, 78.5, 74.0, 72.7, 71.0, 70.0, 41.9, 17.8, 14.0.

**HRMS (ESI)**  $m/z$ : [M + H]<sup>+</sup> Calcd for C<sub>24</sub>H<sub>23</sub>FeN<sub>2</sub>O<sub>2</sub> 427.1031; found: 427.1102.

**1-((8-Quinolinylamino)carbonyl)-1'-valeryl-ferrocene (2h)**

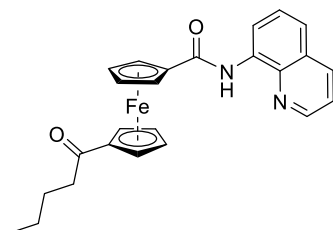

Substrate **2h** was synthesized according to **General Procedure 1**; orange solid.

**<sup>1</sup>H NMR (400 MHz, Chloroform-*d*)**  $\delta$  10.25 (s, 1H), 8.88 (dd,  $J$  = 4.2, 1.7 Hz, 1H), 8.82 (dd,  $J$  = 7.4, 1.6 Hz, 1H), 8.19 (dd,  $J$  = 8.3, 1.7 Hz, 1H), 7.61 – 7.52 (m, 2H), 7.49 (dd,  $J$  = 8.3, 4.2 Hz, 1H), 4.97 (t,  $J$  = 1.9 Hz, 2H), 4.87 (t,  $J$  = 2.0 Hz, 2H), 4.58 (t,  $J$  = 2.0 Hz, 2H), 4.47 (t,  $J$  = 1.9 Hz, 2H), 2.76 – 2.59 (m, 2H), 1.61 – 1.53 (m, 2H), 1.27 – 1.19 (m, 2H), 0.83 (t,  $J$  = 7.3 Hz, 3H).

**<sup>13</sup>C NMR (100 MHz, CDCl<sub>3</sub>)**  $\delta$  204.2, 167.6, 148.5, 138.6, 136.5, 134.5, 128.2, 127.6, 121.8, 121.5, 116.4, 80.6, 78.5, 74.0, 72.6, 71.0, 70.0, 39.8, 26.5, 22.6, 14.0.

**HRMS (ESI)**  $m/z$ : [M + H]<sup>+</sup> Calcd for C<sub>25</sub>H<sub>24</sub>FeN<sub>2</sub>O<sub>2</sub> 441.1187; found: 441.1261.

**1-((8-Quinolinylamino)carbonyl)-1'-2-methyl-1-butyl-ferrocene (2i)**

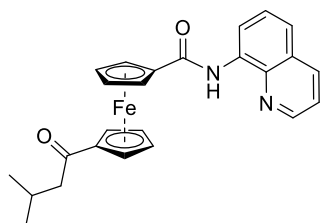

Substrate **2i** was synthesized according to **General Procedure 1**; orange solid.

**<sup>1</sup>H NMR (400 MHz, Chloroform-*d*)**  $\delta$  10.26 (s, 1H), 8.89 (dd,  $J$  = 4.2, 1.6 Hz, 1H), 8.82 (dd,  $J$  = 7.4, 1.5 Hz, 1H), 8.20 (dd,  $J$  = 8.3, 1.6 Hz, 1H), 7.61 – 7.52 (m, 2H), 7.50 (dd,  $J$  = 8.3, 4.2 Hz, 1H), 4.98 (t,  $J$  = 1.9 Hz, 2H), 4.86 (t,  $J$  = 1.9 Hz, 2H), 4.58 (t,  $J$  = 1.9 Hz, 2H), 4.48 (t,  $J$  = 1.9 Hz, 2H), 2.56 (d,  $J$  = 6.9 Hz, 2H), 2.18 (hept,  $J$  = 6.7 Hz, 1H), 0.89 (d,  $J$  = 6.6 Hz, 6H).

**<sup>13</sup>C NMR (100 MHz, CDCl<sub>3</sub>)**  $\delta$  203.8, 167.7, 148.5, 138.6, 136.6, 134.6, 128.2, 127.6, 121.9, 121.5, 116.4, 81.0, 78.5, 74.2, 72.7, 71.0, 70.0, 49.0, 25.1, 22.8.

**HRMS (ESI)**  $m/z$ : [M + H]<sup>+</sup> Calcd for C<sub>25</sub>H<sub>25</sub>FeN<sub>2</sub>O<sub>2</sub> 441.1187; found:441.1259.

**1-((8-Quinolinylamino)carbonyl)-1'-2,2-dimethyl-1-propionyl-ferrocene (2j)**

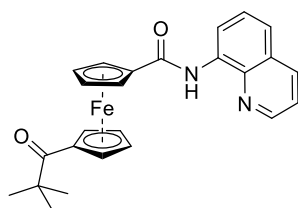

Substrate **2j** was synthesized according to **General Procedure 1**; orange solid.

**<sup>1</sup>H NMR (400 MHz, Chloroform-*d*)**  $\delta$  10.27 (s, 1H), 8.89 (dd,  $J$  = 4.2, 1.7 Hz, 1H), 8.79 (dd,  $J$  = 7.5, 1.6 Hz, 1H), 8.20 (dd,  $J$  = 8.2, 1.7 Hz, 1H), 7.61 – 7.52 (m, 2H), 7.50 (dd,  $J$  = 8.3, 4.2 Hz, 1H), 4.97 (dt,  $J$  = 3.9, 1.9 Hz, 4H), 4.55 (t,  $J$  = 2.0 Hz, 2H), 4.46 (t,  $J$  = 2.0 Hz, 2H), 1.31 (s, 9H).

**<sup>13</sup>C NMR (100 MHz, CDCl<sub>3</sub>)**  $\delta$  209.8, 167.9, 148.5, 138.6, 136.5, 134.7, 128.2, 127.6, 121.8, 121.4, 116.4, 78.3, 78.3, 73.7, 73.3, 72.5, 69.9, 44.6, 28.1.

**HRMS (ESI)**  $m/z$ : [M + H]<sup>+</sup> Calcd for C<sub>25</sub>H<sub>24</sub>FeN<sub>2</sub>O<sub>2</sub> 441.1187; found: 441.1261.

**1-((8-Quinolinylamino)carbonyl)-1'-(*o*-tolyl)acetyl-ferrocene (2k)**

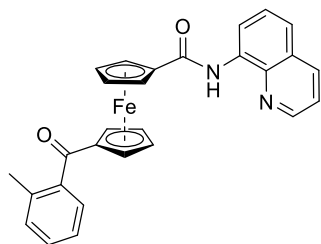

Substrate **2k** was synthesized according to **General Procedure 1**; orange solid.

**<sup>1</sup>H NMR (400 MHz, Chloroform-*d*)**  $\delta$  10.24 (s, 1H), 8.85 (dd,  $J$  = 4.2, 1.7 Hz, 1H), 8.74 (dd,  $J$  = 7.1, 1.9 Hz, 1H), 8.19 (dd,  $J$  = 8.3, 1.7 Hz, 1H), 7.60 – 7.51 (m, 3H), 7.49 (dd,  $J$  = 8.3, 4.2 Hz, 1H), 7.33 – 7.27 (m, 1H), 7.21 – 7.11 (m, 2H), 5.02 (t,  $J$  = 1.9 Hz, 2H), 4.89 (t,  $J$  = 2.0 Hz, 2H), 4.65 (t,  $J$  = 1.9 Hz, 2H), 4.55 (t,  $J$  = 1.9 Hz, 2H), 2.40 (s, 3H).

**<sup>13</sup>C NMR (100 MHz, CDCl<sub>3</sub>)**  $\delta$  201.6, 167.6, 148.5, 139.6, 138.6, 136.5, 136.1, 134.6, 131.2, 130.1, 128.1, 127.8, 127.6, 125.2, 121.8, 121.5, 116.5, 80.7, 78.6, 74.9, 73.1, 72.8, 70.1, 20.1.

**HRMS (ESI)**  $m/z$ : [M + H]<sup>+</sup> Calcd for C<sub>28</sub>H<sub>23</sub>FeN<sub>2</sub>O<sub>2</sub> 475.1031; found: 475.1104.

**1-((8-Quinolinylamino)carbonyl)-1'-*p*-chlorophenylacetyl -ferrocene (2l)**

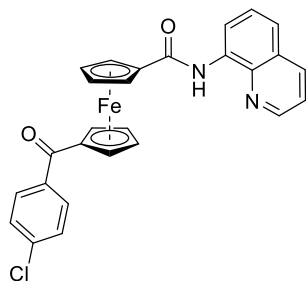

Substrate **2l** was synthesized according to **General Procedure 1**; orange solid.

**<sup>1</sup>H NMR (400 MHz, Chloroform-*d*)**  $\delta$  10.16 (s, 1H), 8.85 (dd,  $J$  = 4.2, 1.7 Hz, 1H), 8.70 (dd,  $J$  = 6.7, 2.2 Hz, 1H), 8.20 (dd,  $J$  = 8.3, 1.7 Hz, 1H), 7.73 (d,  $J$  = 8.5 Hz, 2H), 7.59 – 7.52 (m, 2H), 7.50 (dd,  $J$  = 8.3, 4.2 Hz, 1H), 7.17 (d,  $J$  = 8.5 Hz, 2H), 5.02 (t,  $J$  = 2.0 Hz, 2H), 4.99 – 4.94 (m, 2H), 4.73 – 4.63 (m, 2H), 4.53 – 4.43 (m, 2H).

**<sup>13</sup>C NMR (100 MHz, CDCl<sub>3</sub>)**  $\delta$  196.9, 167.3, 148.4, 138.5, 138.1, 137.4, 136.6, 134.4, 129.7, 128.5, 128.1, 127.6, 121.8, 121.6, 116.4, 79.4, 78.9, 74.6, 73.1, 70.6.

**HRMS (ESI)**  $m/z$ : [M + H]<sup>+</sup> Calcd for C<sub>27</sub>H<sub>20</sub>ClFeN<sub>2</sub>O<sub>2</sub> 495.0484; found: 495.0560.

**1-((8-Quinolinylamino)carbonyl)-1'-methanol-ferrocene (2m)**

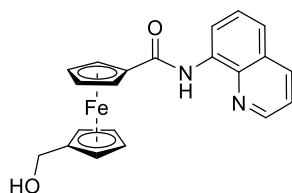

Substrate **2m** was synthesized according to **General Procedure 5**; yellow solid.

**<sup>1</sup>H NMR (400 MHz, Chloroform-*d*)**  $\delta$  10.28 (s, 1H), 8.89 – 8.84 (m, 2H), 8.20 (dd,  $J$  = 8.2, 1.7 Hz, 1H), 7.61 – 7.52 (m, 2H), 7.49 (dd,  $J$  = 8.2, 4.2 Hz, 1H), 4.97 (t,  $J$  = 1.9 Hz, 2H), 4.50 (t,  $J$  = 1.9 Hz, 2H), 4.38 (s, 2H), 4.32 (t,  $J$  = 1.9 Hz, 2H), 4.23 (t,  $J$  = 1.9 Hz, 2H).

**<sup>13</sup>C NMR (100 MHz, CDCl<sub>3</sub>)**  $\delta$  170.3, 148.5, 138.6, 136.6, 134.4, 128.2, 127.7, 121.8, 121.7, 116.9, 91.9, 71.4, 69.2, 69.2, 68.7, 60.1.

**HRMS (ESI)**  $m/z$ : [M + Na]<sup>+</sup> Calcd for C<sub>21</sub>H<sub>18</sub>FeN<sub>2</sub>O<sub>2</sub>Na 409.0615; found:409.0613.

## 4. Screening of reaction conditions

**Table S1.** Screening of solvents <sup>a</sup>

| entry | solvents (0.1 M) | yield (%) <sup>b</sup> |
|-------|------------------|------------------------|
| 1     | DMF              | 11                     |
| 2     | DMSO             | trace                  |
| 3     | NMP              | 15                     |
| 4     | MeCN             | 32                     |
| 5     | iPrOH            | trace                  |
| 6     | HFIP             | n.r                    |

<sup>a</sup> Reactions conditions: **1a** (0.1 mmol), **2a** (0.3 mmol), CuI (20 mol%), K<sub>2</sub>CO<sub>3</sub> (1.0 equiv.), NMO (2.0 equiv.), solvent (0.1 M) under air at 120 °C for 12 h. <sup>b</sup> Isolated yield.

**Table S2.** Screening of catalysts <sup>a</sup>

| entry | catalyst (20 mol%)   | yield (%) <sup>b</sup> |
|-------|----------------------|------------------------|
| 1     | Cu(OAc) <sub>2</sub> | 10                     |
| 2     | CuCN                 | 12                     |
| 3     | Cu <sub>2</sub> O    | n.r                    |
| 4     | CuCl                 | 18                     |
| 5     | CuI                  | 32                     |
| 6     | TcCu                 | trace                  |

<sup>a</sup> Reactions conditions: **1a** (0.1 mmol), **2a** (0.3 mmol), Catalyst (20 mol%), K<sub>2</sub>CO<sub>3</sub> (1.0 equiv.), NMO (2.0 equiv.), MeCN (0.1 M) under air at 120 °C for 12 h. <sup>b</sup> Isolated yield.

**Table S3.** Screening of several bases <sup>a</sup>

| 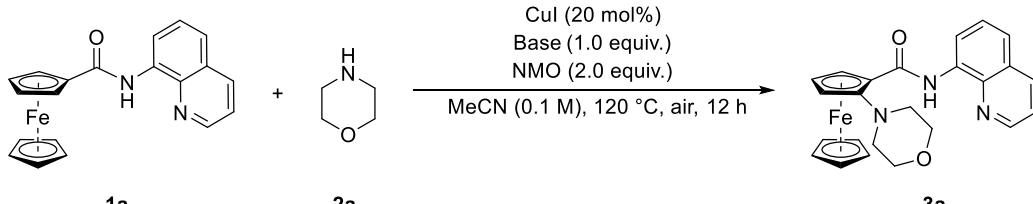 |                                 |                        |
|------------------------------------------------------------------------------------|---------------------------------|------------------------|
| entry                                                                              | base (1.0 equiv.)               | yield (%) <sup>b</sup> |
| 1                                                                                  | K <sub>3</sub> PO <sub>4</sub>  | 28                     |
| 2                                                                                  | Cs <sub>2</sub> CO <sub>3</sub> | trace                  |
| 3                                                                                  | K <sub>2</sub> CO <sub>3</sub>  | 32                     |
| 4                                                                                  | DMAP                            | 29                     |

<sup>a</sup> Reactions conditions: **1a** (0.1 mmol), **2a** (0.3 mmol), CuI (20 mol%), Base (1.0 equiv.), NMO (2.0 equiv.), MeCN (0.1 M) under air at 120 °C for 12 h. <sup>b</sup> Isolated yield.

**Table S4.** Screening of several oxidants <sup>a</sup>

| 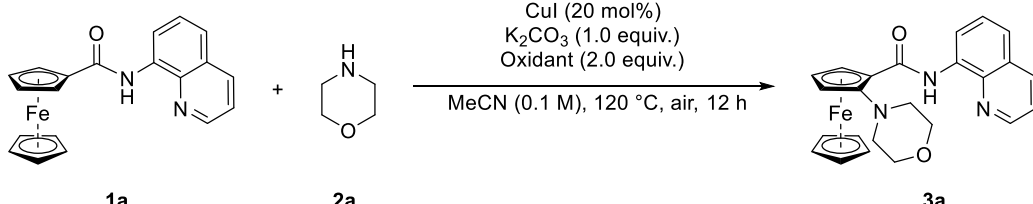 |                      |                        |
|-------------------------------------------------------------------------------------|----------------------|------------------------|
| entry                                                                               | oxidant (2.0 equiv.) | yield (%) <sup>b</sup> |
| 1                                                                                   | NMO                  | 32                     |
| 2                                                                                   | MnO <sub>2</sub>     | trace                  |
| 3                                                                                   | TEMPO                | 23                     |
| 4                                                                                   | O <sub>2</sub>       | 8                      |

<sup>a</sup> Reactions conditions: **1a** (0.1 mmol), **2a** (0.3 mmol), CuI (20 mol%), K<sub>2</sub>CO<sub>3</sub> (1.0 equiv.), Oxidant (2.0 equiv.), MeCN (0.1 M) under air at 120 °C for 12 h. <sup>b</sup> Isolated yield.

**Table S5.** Screening of several additives <sup>a</sup>

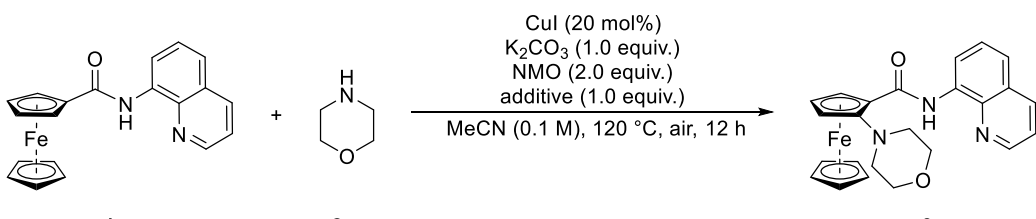

| entry | additive (1.0 equiv.)                                                               | yield (%) <sup>b</sup> |
|-------|-------------------------------------------------------------------------------------|------------------------|
| 1     |    | 34                     |
| 2     |    | n.r                    |
| 3     |    | 33                     |
| 4     |    | trace                  |
| 5     |  | n.r                    |
| 6     |  | 23                     |

<sup>a</sup> Reactions conditions: **1a** (0.1 mmol), **2a** (0.3 mmol), CuI (20 mol%), K<sub>2</sub>CO<sub>3</sub> (1.0 equiv.), NMO (2.0 equiv.), additive (1.0 equiv.), MeCN (0.1 M) under air at 120 °C for 12 h. <sup>b</sup> Isolated yield.

**Table S6.** Screening of several solvent volumes <sup>a</sup>

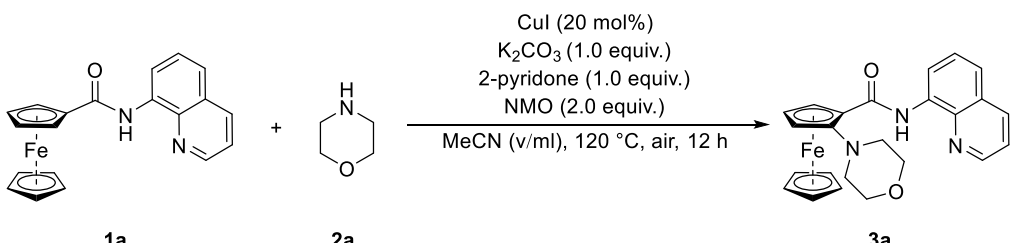

| entry | MeCN (v/ml) | yield (%) <sup>b</sup> |
|-------|-------------|------------------------|
| 1     | 1.5         | 21                     |
| 2     | 1.0         | 34                     |
| 3     | 0.8         | 33                     |
| 4     | 0.4         | 33                     |
| 5     | 0.1         | 34                     |
| 6     | neat        | 36 <sup>c</sup>        |

<sup>a</sup> Reactions conditions: **1a** (0.1 mmol), **2a** (0.3 mmol), CuI (20 mol%), K<sub>2</sub>CO<sub>3</sub> (1.0 equiv.), NMO (2.0 equiv.), 2-pyridone (1.0 equiv.) MeCN (v/ml), under air at 120 °C for 12 h. <sup>b</sup> Isolated yield, <sup>c</sup> Morphine (0.5 mmol).



**Table S7.** Screening of several temperatures <sup>a</sup>

| <div style="display: flex; align-items: center; justify-content: center;"> <div style="text-align: center;"> 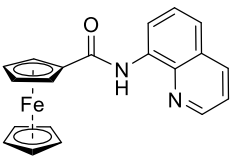 <p><b>1a</b></p> </div> <div style="margin: 0 10px;">+</div> <div style="text-align: center;">  <p><b>2a</b></p> </div> <div style="margin-left: 20px;"> <p style="text-align: center;">Cul (20 mol%)<br/>K<sub>2</sub>CO<sub>3</sub> (1.0 equiv.)<br/>2-pyridone (1.0 equiv.)<br/><b>NMO (2.0 equiv.)</b><br/>neat, T (°C), air, 12 h</p> <p style="text-align: center;">→</p> </div> <div style="text-align: center;">  <p><b>3a</b></p> </div> </div> |        |                        |
|----------------------------------------------------------------------------------------------------------------------------------------------------------------------------------------------------------------------------------------------------------------------------------------------------------------------------------------------------------------------------------------------------------------------------------------------------------------------------------------------------------------------------------------------------------------------------------------------------------------------------------------------------------------------------------------------------------------------------------------------------------------------------------------------------------------------------|--------|------------------------|
| entry                                                                                                                                                                                                                                                                                                                                                                                                                                                                                                                                                                                                                                                                                                                                                                                                                      | T (°C) | yield (%) <sup>b</sup> |
| 1                                                                                                                                                                                                                                                                                                                                                                                                                                                                                                                                                                                                                                                                                                                                                                                                                          | 140    | 10                     |
| 2                                                                                                                                                                                                                                                                                                                                                                                                                                                                                                                                                                                                                                                                                                                                                                                                                          | 120    | 34                     |
| 3                                                                                                                                                                                                                                                                                                                                                                                                                                                                                                                                                                                                                                                                                                                                                                                                                          | 100    | 46                     |
| 4                                                                                                                                                                                                                                                                                                                                                                                                                                                                                                                                                                                                                                                                                                                                                                                                                          | 80     | 56                     |
| 5                                                                                                                                                                                                                                                                                                                                                                                                                                                                                                                                                                                                                                                                                                                                                                                                                          | 60     | 43                     |

<sup>a</sup> Reactions conditions: **1a** (0.1 mmol), **2a** (0.5 mmol), Cul (20 mol%), K<sub>2</sub>CO<sub>3</sub> (1.0 equiv.), NMO (2.0 equiv.), 2-pyridone (1.0 equiv.) under air for 12 h. <sup>b</sup> Isolated yield.

**Table S8.** Screening of several times <sup>a</sup>

| <div style="display: flex; align-items: center; justify-content: center;"> <div style="text-align: center;"> 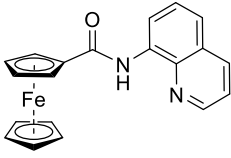 <p><b>1a</b></p> </div> <div style="margin: 0 10px;">+</div> <div style="text-align: center;">  <p><b>2a</b></p> </div> <div style="margin-left: 20px;"> <p style="text-align: center;">Cul (20 mol%)<br/>K<sub>2</sub>CO<sub>3</sub> (1.0 equiv.)<br/>2-pyridone (1.0 equiv.)<br/>NMO (2.0 equiv.)<br/>neat, 80 °C, air, t (h)</p> <p style="text-align: center;">→</p> </div> <div style="text-align: center;">  <p><b>3a</b></p> </div> </div> |       |                        |
|-------------------------------------------------------------------------------------------------------------------------------------------------------------------------------------------------------------------------------------------------------------------------------------------------------------------------------------------------------------------------------------------------------------------------------------------------------------------------------------------------------------------------------------------------------------------------------------------------------------------------------------------------------------------------------------------------------------------------------------------------------------------------------------------------------------------------|-------|------------------------|
| entry                                                                                                                                                                                                                                                                                                                                                                                                                                                                                                                                                                                                                                                                                                                                                                                                                   | t (h) | yield (%) <sup>b</sup> |
| 1                                                                                                                                                                                                                                                                                                                                                                                                                                                                                                                                                                                                                                                                                                                                                                                                                       | 12    | 56                     |
| 2                                                                                                                                                                                                                                                                                                                                                                                                                                                                                                                                                                                                                                                                                                                                                                                                                       | 10    | 57                     |
| 3                                                                                                                                                                                                                                                                                                                                                                                                                                                                                                                                                                                                                                                                                                                                                                                                                       | 8     | 59                     |
| 4                                                                                                                                                                                                                                                                                                                                                                                                                                                                                                                                                                                                                                                                                                                                                                                                                       | 6     | 68                     |
| 5                                                                                                                                                                                                                                                                                                                                                                                                                                                                                                                                                                                                                                                                                                                                                                                                                       | 4     | 80                     |
| 6                                                                                                                                                                                                                                                                                                                                                                                                                                                                                                                                                                                                                                                                                                                                                                                                                       | 2     | 52                     |

<sup>a</sup> Reactions conditions: **1a** (0.1 mmol), **2a** (0.5 mmol), Cul (20 mol%), K<sub>2</sub>CO<sub>3</sub> (1.0 equiv.), NMO (2.0 equiv.), 2-pyridone (1.0 equiv.) under air at 80 °C. <sup>b</sup> Isolated yield.

## 5. General procedures for Cu-catalyzed monoselective C–H amination of ferrocenes with alkylamines

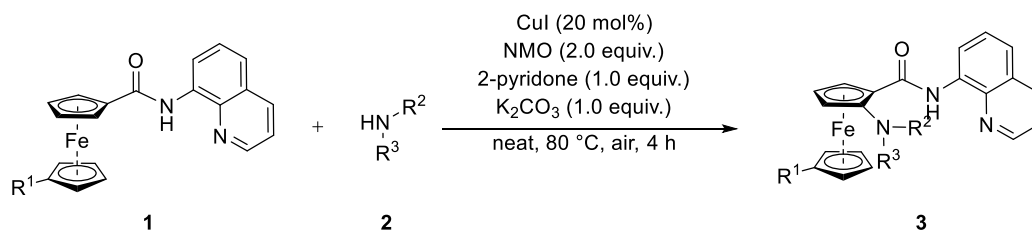

To a 10 mL Schlenk tube was added **1** (0.1 mmol), **2** (0.5 mmol), K<sub>2</sub>CO<sub>3</sub> (14.0 mg, 1.0 equiv), CuI (3.8 mg, 20 mol %), NMO (23.4 mg, 2.0 equiv) and 2-pyridone (9.5 mg, 1.0 equiv), stirred at 80 °C (aluminum heat transfer block) for 4 h. After cooling to room temperature, the mixture was diluted with DCM, the resulting residue was purified by preparative TLC using Hexane/EtOAc as the eluent to afford the desired product.

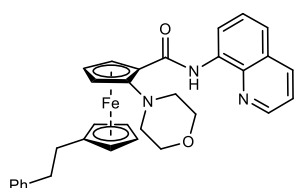

### **1-Morpholino-2-((8-quinolinylamino)carbonyl)-1'-phenethyl-ferrocene (3b)**

A purification by flash chromatography in petroleum ether : ethyl acetate= 4 : 1 to give **3b** as yellow foam (33.8 mg, 62%).

**<sup>1</sup>H NMR (400 MHz, Chloroform-*d*)** δ 12.27 (s, 1H), 9.02 (dd, *J* = 7.5, 1.6 Hz, 1H), 8.87 (dd, *J* = 4.2, 1.7 Hz, 1H), 8.19 (dd, *J* = 8.2, 1.7 Hz, 1H), 7.59 – 7.52 (m, 2H), 7.52 – 7.45 (m, 1H), 7.11 (m, *J* = 4.6, 1.6 Hz, 3H), 6.88 (dd, *J* = 7.2, 2.4 Hz, 2H), 4.88 (dd, *J* = 2.8, 1.5 Hz, 1H), 4.30 (dd, *J* = 2.7, 1.6 Hz, 1H), 4.26 (t, *J* = 2.8 Hz, 1H), 4.14 – 3.93 (m, 8H), 3.08 (s, 2H), 2.94 (m, *J* = 11.6, 5.9, 3.4 Hz, 2H), 2.65 – 2.44 (m, 4H).

**<sup>13</sup>C NMR (100 MHz, CDCl<sub>3</sub>)** δ 169.3, 148.1, 141.7, 139.0, 136.3, 136.3, 128.4, 128.3, 128.2, 127.7, 125.8, 121.6, 121.2, 117.6, 112.0, 90.5, 72.7, 71.4, 70.2, 70.1, 69.6, 67.8, 67.2, 66.6, 60.0, 55.5, 37.6, 29.9.

**HRMS (ESI)** *m/z*: [M + Na]<sup>+</sup> Calcd for C<sub>32</sub>H<sub>31</sub>FeN<sub>3</sub>O<sub>2</sub>Na 568.1658; found: 568.1661.

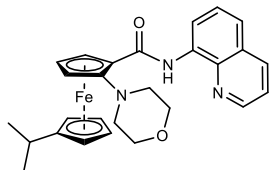

**1-Morpholino-2-((8-quinolinylamino)carbonyl)-1'-isopropyl-ferrocene (3c)**

A purification by flash chromatography in petroleum ether : ethyl acetate= 4 : 1 to give **3c** as yellow foam (32.8 mg, 68%).

**<sup>1</sup>H NMR (400 MHz, Chloroform-*d*)**  $\delta$  12.27 (s, 1H), 9.01 (dd,  $J$  = 7.6, 1.4 Hz, 1H), 8.95 (dd,  $J$  = 4.2, 1.7 Hz, 1H), 8.19 (dd,  $J$  = 8.3, 1.7 Hz, 1H), 7.58 (t,  $J$  = 7.9 Hz, 1H), 7.55 – 7.46 (m, 2H), 4.87 (dd,  $J$  = 2.8, 1.5 Hz, 1H), 4.33 (s, 1H), 4.27 (t,  $J$  = 2.8 Hz, 1H), 4.16 – 4.07 (m, 4H), 4.07 – 3.99 (m, 4H), 3.03 (d,  $J$  = 50.7 Hz, 4H), 2.60 (m,  $J$  = 6.8 Hz, 1H), 1.13 (d,  $J$  = 6.8 Hz, 3H), 1.08 (d,  $J$  = 6.9 Hz, 3H).

**<sup>13</sup>C NMR (100 MHz, CDCl<sub>3</sub>)**  $\delta$  169.6, 148.2, 139.1, 136.4, 136.3, 128.4, 127.7, 121.6, 121.1, 117.5, 111.8, 98.7, 72.2, 71.0, 70.0, 70.0, 68.1, 67.5, 67.4, 66.6, 60.0, 55.5, 27.2, 23.9, 23.5.

**HRMS (ESI)**  $m/z$ : [M + Na]<sup>+</sup> Calcd for C<sub>27</sub>H<sub>29</sub>FeN<sub>3</sub>O<sub>2</sub>Na 506.1501; found: 506.1497.

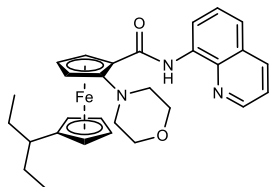

**1-Morpholino-2-((8-quinolinylamino)carbonyl)-1'-pentan-3-ferrocene (3d)**

A purification by flash chromatography in petroleum ether : ethyl acetate= 4 : 1 to give **3d** as yellow foam (29.6mg, 58%).

**<sup>1</sup>H NMR (400 MHz, Chloroform-*d*)**  $\delta$  12.28 (s, 1H), 9.02 (dd,  $J$  = 7.7, 1.5 Hz, 1H), 8.95 (dd,  $J$  = 4.2, 1.7 Hz, 1H), 8.19 (dd,  $J$  = 8.2, 1.7 Hz, 1H), 7.58 (t,  $J$  = 7.9 Hz, 1H), 7.55 – 7.46 (m, 2H), 4.85 (dd,  $J$  = 2.8, 1.5 Hz, 1H), 4.32 (dd,  $J$  = 2.7, 1.6 Hz, 1H), 4.23 (t,  $J$  = 2.7 Hz, 1H), 4.15 – 4.09 (m, 2H), 4.09 (dt,  $J$  = 3.8, 1.3 Hz, 3H), 4.03 (dd,  $J$  = 6.0, 3.4 Hz, 5H), 3.09 (s, 2H), 3.00 – 2.89 (m, 2H), 2.18 (tt,  $J$  = 7.4, 5.2 Hz, 1H), 1.70 – 1.56 (m, 1H), 1.56 – 1.33 (m, 3H), 0.79 (t,  $J$  = 7.4 Hz, 3H), 0.68 (t,  $J$  = 7.4 Hz, 3H).

**<sup>13</sup>C NMR (100 MHz, CDCl<sub>3</sub>)**  $\delta$  169.6, 148.2, 139.1, 136.4, 128.4, 127.7, 121.6, 121.1, 117.5, 111.8, 97.0, 72.3, 70.8, 70.7, 69.8, 68.3, 68.0, 67.6, 66.7, 60.1, 39.9, 26.5, 26.3, 11.3, 11.0.

**HRMS (ESI)** m/z:  $[M + Na]^+$  Calcd for  $C_{29}H_{33}FeN_3O_2Na$  534.1814; found: 534.1815.

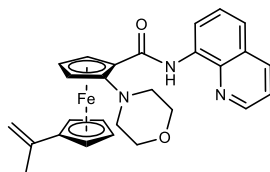

**1-Morpholino-2-((8-quinolinylamino)carbonyl)-1'-2-methyl-1-ene-ferrocene (3e)**

A purification by flash chromatography in petroleum ether : ethyl acetate = 4 : 1 to give **3e** as yellow foam (26.5 mg, 55%).

$^1H$  NMR (400 MHz, Chloroform-*d*)  $\delta$  12.21 (s, 1H), 9.02 (dd,  $J$  = 7.6, 1.5 Hz, 1H), 8.96 (dd,  $J$  = 4.2, 1.7 Hz, 1H), 8.19 (dd,  $J$  = 8.3, 1.7 Hz, 1H), 7.58 (t,  $J$  = 7.9 Hz, 1H), 7.55 – 7.47 (m, 2H), 5.04 (s, 1H), 4.86 (dd,  $J$  = 2.8, 1.5 Hz, 1H), 4.76 – 4.71 (m, 1H), 4.45 (q,  $J$  = 1.8 Hz, 1H), 4.41 (q,  $J$  = 1.7 Hz, 1H), 4.29 (dd,  $J$  = 2.7, 1.6 Hz, 1H), 4.25 (t,  $J$  = 1.9 Hz, 2H), 4.21 (t,  $J$  = 2.7 Hz, 1H), 4.05 (m,  $J$  = 9.8, 6.1, 3.1 Hz, 4H), 3.09 (s, 2H), 2.93 (m,  $J$  = 11.7, 5.9, 3.4 Hz, 2H), 1.95 (s, 3H).

$^{13}C$  NMR (100 MHz,  $CDCl_3$ )  $\delta$  168.9, 148.1, 139.7, 139.1, 136.4, 128.4, 127.7, 121.6, 121.1, 117.5, 112.3, 110.4, 88.6, 73.0, 72.0, 71.5, 68.6, 68.5, 68.2, 67.4, 66.6, 60.5, 55.4, 52.8, 21.6.

**HRMS (ESI)** m/z:  $[M]^+$  Calcd for  $C_{27}H_{27}FeN_3O_2$  481.1453; found: 481.1449.

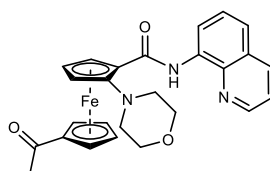

**1-Morpholino-2-((8-quinolinylamino)carbonyl)-1'-acetyl-ferrocene (3f)**

A purification by flash chromatography in petroleum ether : ethyl acetate = 4 : 1 to give **3f** as yellow foam (31.9mg, 66%).

$^1H$  NMR (400 MHz, Chloroform-*d*)  $\delta$  12.18 (s, 1H), 9.00 – 8.94 (m, 2H), 8.20 (dd,  $J$  = 8.3, 1.7 Hz, 1H), 7.61 – 7.55 (m, 2H), 7.54 – 7.49 (m, 1H), 4.97 (dd,  $J$  = 2.8, 1.6 Hz, 1H), 4.86 (dt,  $J$  = 2.7, 1.3 Hz, 1H), 4.75 (dt,  $J$  = 2.6, 1.3 Hz, 1H), 4.50 (m,  $J$  = 4.5, 2.6, 1.3 Hz, 2H), 4.35 (dd,  $J$  = 2.8, 1.6 Hz, 1H), 4.32 (t,  $J$  = 2.8 Hz, 1H), 4.02 (m,  $J$  = 14.3, 6.4, 3.1 Hz, 4H), 3.04 (s, 2H), 2.90 (m,  $J$  = 11.6, 6.1, 3.1 Hz, 2H), 2.31 (s, 3H).

**$^{13}\text{C}$  NMR (100 MHz,  $\text{CDCl}_3$ )**  $\delta$  201.8, 168.1, 148.4, 139.0, 136.5, 135.8, 128.4, 127.7, 121.8, 121.6, 117.6, 113.5, 80.8, 75.5, 75.1, 73.0, 72.2, 71.4, 68.9, 67.9, 66.5, 61.0, 55.1, 27.9.

**HRMS (ESI)**  $m/z$ :  $[\text{M} + \text{Na}]^+$  Calcd for  $\text{C}_{26}\text{H}_{25}\text{FeN}_3\text{O}_3\text{Na}$  506.1137; found: 506.1142.

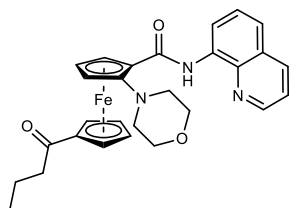

**1-Morpholino-2-((8-quinolinylamino)carbonyl)-1'-butyryl-ferrocene (3g)**

A purification by flash chromatography in petroleum ether : ethyl acetate= 4 : 1 to give **3g** as yellow foam (17.9 mg, 35%).

**$^1\text{H}$  NMR (400 MHz,  $\text{Chloroform-}d$ )**  $\delta$  12.19 (s, 1H), 9.02 – 8.95 (m, 2H), 8.21 (dd,  $J$  = 8.2, 1.7 Hz, 1H), 7.62 – 7.55 (m, 2H), 7.52 (dd,  $J$  = 8.2, 4.1 Hz, 1H), 4.98 (dd,  $J$  = 2.8, 1.5 Hz, 1H), 4.89 (dt,  $J$  = 2.7, 1.3 Hz, 1H), 4.78 (dt,  $J$  = 2.6, 1.3 Hz, 1H), 4.48 (m,  $J$  = 2.6, 1.2 Hz, 2H), 4.35 (dd,  $J$  = 2.8, 1.6 Hz, 1H), 4.31 (t,  $J$  = 2.8 Hz, 1H), 4.10 – 3.92 (m, 4H), 3.06 (s, 2H), 2.90 (m,  $J$  = 11.6, 6.2, 3.0 Hz, 2H), 2.70 – 2.50 (m, 2H), 1.64 – 1.49 (m, 2H), 0.84 (t,  $J$  = 7.4 Hz, 3H).

**$^{13}\text{C}$  NMR (100 MHz,  $\text{CDCl}_3$ )**  $\delta$  204.1, 168.2, 148.4, 139.0, 136.5, 135.9, 128.4, 127.7, 121.8, 121.6, 117.7, 113.4, 80.7, 75.5, 74.9, 73.0, 71.5, 71.3, 68.7, 67.9, 66.6, 61.0, 55.2, 42.0, 17.8, 13.9.

**HRMS (ESI)**  $m/z$ :  $[\text{M} + \text{Na}]^+$  Calcd for  $\text{C}_{28}\text{H}_{29}\text{FeN}_3\text{O}_3\text{Na}$  534.1450; found: 534.1455.

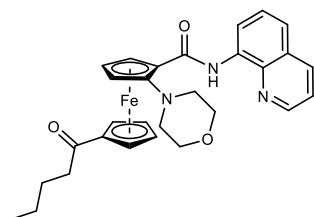

**1-Morpholino-2-((8-quinolinylamino)carbonyl)-1'-valeryl-ferrocene (3h)**

A purification by flash chromatography in petroleum ether : ethyl acetate= 4 : 1 to give **3h** as yellow foam (27.8mg, 53%).

**$^1\text{H}$  NMR (400 MHz,  $\text{Chloroform-}d$ )**  $\delta$  12.18 (s, 1H), 9.01 – 8.95 (m, 2H), 8.21 (dd,  $J$  = 8.3, 1.7 Hz, 1H), 7.62 – 7.55 (m, 2H), 7.52 (dd,  $J$  = 8.2, 4.1 Hz, 1H), 4.98 (dd,  $J$  = 2.8, 1.6 Hz, 1H), 4.88 (dt,  $J$  = 2.7, 1.4 Hz, 1H), 4.78 (dt,  $J$  = 2.6, 1.3 Hz, 1H), 4.48 (pd,  $J$  = 2.5, 1.3 Hz, 2H), 4.34 (dd,  $J$  = 2.8,

1.6 Hz, 1H), 4.30 (t,  $J = 2.8$  Hz, 1H), 4.03 (m,  $J = 16.8, 8.1, 5.0$  Hz, 4H), 3.06 (s, 2H), 2.90 (m,  $J = 11.5, 6.2, 3.0$  Hz, 2H), 2.70 – 2.52 (m, 2H), 1.62 – 1.42 (m, 2H), 1.28 – 1.13 (m, 2H), 0.84 (t,  $J = 7.3$  Hz, 3H).

**$^{13}\text{C}$  NMR (100 MHz,  $\text{CDCl}_3$ )**  $\delta$  204.3, 168.2, 148.4, 139.0, 136.5, 135.9, 128.4, 127.7, 121.8, 121.6, 117.7, 113.4, 80.7, 75.5, 74.9, 73.0, 71.6, 71.3, 68.7, 67.8, 66.6, 61.0, 55.2, 39.9, 26.6, 22.5, 14.0.

**HRMS (ESI)**  $m/z$ :  $[\text{M} + \text{Na}]^+$  Calcd for  $\text{C}_{29}\text{H}_{31}\text{FeN}_3\text{O}_3\text{Na}$  548.1607; found: 548.1608.

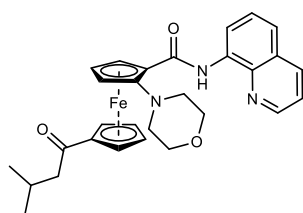

**1-Morpholino-2-((8-quinolinylamino)carbonyl)-1'-2-methyl-1-butyryl-ferrocene (3i)**

A purification by flash chromatography in petroleum ether : ethyl acetate = 4 : 1 to give **3i** as yellow foam (24.2 mg, 46%).

**$^1\text{H}$  NMR (400 MHz,  $\text{Chloroform-}d$ )**  $\delta$  12.19 (s, 1H), 9.03 – 8.91 (m, 2H), 8.21 (dd,  $J = 8.3, 1.7$  Hz, 1H), 7.62 – 7.55 (m, 2H), 7.52 (dd,  $J = 8.3, 4.2$  Hz, 1H), 4.98 (dd,  $J = 2.8, 1.6$  Hz, 1H), 4.89 (dt,  $J = 2.6, 1.4$  Hz, 1H), 4.76 (dt,  $J = 2.7, 1.4$  Hz, 1H), 4.47 (dt,  $J = 2.6, 1.3$  Hz, 2H), 4.34 (dd,  $J = 2.8, 1.6$  Hz, 1H), 4.31 (t,  $J = 2.8$  Hz, 1H), 4.10 – 3.92 (m, 4H), 3.06 (s, 2H), 2.90 (m,  $J = 11.6, 6.2, 3.0$  Hz, 2H), 2.58 – 2.41 (m, 2H), 2.13 (dt,  $J = 13.5, 6.7$  Hz, 1H), 0.90 (d,  $J = 6.6$  Hz, 3H), 0.84 (d,  $J = 6.7$  Hz, 3H).

**$^{13}\text{C}$  NMR (100 MHz,  $\text{CDCl}_3$ )**  $\delta$  203.9, 168.2, 148.4, 139.0, 136.5, 135.9, 128.4, 127.7, 121.8, 121.6, 117.6, 113.4, 80.9, 75.8, 75.0, 73.0, 71.5, 71.4, 68.6, 67.9, 66.6, 61.0, 55.1, 49.0, 25.2, 22.8.

**HRMS (ESI)**  $m/z$ :  $[\text{M} + \text{Na}]^+$  Calcd for  $\text{C}_{29}\text{H}_{31}\text{FeN}_3\text{O}_3\text{Na}$  548.1607; found: 548.1609.

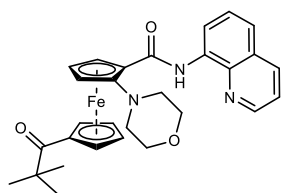

**1-Morpholino-2-((8-quinolinylamino)carbonyl)-1'-2,2-dimethyl-1-propionyl-ferrocene (3j)**

A purification by flash chromatography in petroleum ether : ethyl acetate = 4 : 1 to give **3j** as yellow

foam (33.6 mg, 64%).

**<sup>1</sup>H NMR (400 MHz, Chloroform-*d*)**  $\delta$  12.20 (s, 1H), 8.99 – 8.91 (m, 2H), 8.20 (dd,  $J$  = 8.2, 1.7 Hz, 1H), 7.61 – 7.54 (m, 2H), 7.52 (dd,  $J$  = 8.3, 4.2 Hz, 1H), 5.02 (dt,  $J$  = 2.7, 1.4 Hz, 1H), 4.99 (dd,  $J$  = 2.9, 1.5 Hz, 1H), 4.84 (dt,  $J$  = 2.6, 1.3 Hz, 1H), 4.42 (m,  $J$  = 3.8, 2.6, 1.4 Hz, 2H), 4.32 (dd,  $J$  = 2.7, 1.6 Hz, 1H), 4.27 (t,  $J$  = 2.8 Hz, 1H), 4.07 – 3.93 (m, 4H), 3.11 (s, 2H), 2.91 (m,  $J$  = 11.6, 6.0, 3.2 Hz, 2H), 1.29 (s, 9H).

**<sup>13</sup>C NMR (100 MHz, CDCl<sub>3</sub>)**  $\delta$  209.8, 168.4, 148.4, 139.0, 136.5, 135.9, 128.4, 127.7, 121.8, 121.5, 117.6, 113.4, 77.7, 75.3, 75.3, 73.9, 72.6, 71.9, 68.8, 68.5, 66.6, 61.4, 55.1, 44.5, 28.2.

**HRMS (ESI)**  $m/z$ :  $[M + Na]^+$  Calcd for C<sub>29</sub>H<sub>31</sub>FeN<sub>3</sub>O<sub>3</sub>Na 548.1607; found: 548.1606.

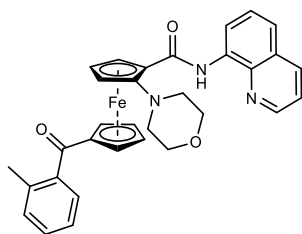

**1-Morpholino-2-((8-quinolinylamino)carbonyl)-1'-(*o*-tolyl)acetyl-ferrocene (3k)**

A purification by flash chromatography in petroleum ether : ethyl acetate = 4 : 1 to give **3k** as yellow foam (33.5 mg, 60%).

**<sup>1</sup>H NMR (400 MHz, Chloroform-*d*)**  $\delta$  12.18 (s, 1H), 8.95 (dd,  $J$  = 4.2, 1.7 Hz, 1H), 8.93 (dd,  $J$  = 7.2, 1.9 Hz, 1H), 8.21 (dd,  $J$  = 8.3, 1.7 Hz, 1H), 7.61 – 7.55 (m, 2H), 7.54 – 7.48 (m, 2H), 7.36 (td,  $J$  = 7.5, 1.5 Hz, 1H), 7.27 (s, 1H), 7.25 – 7.20 (m, 1H), 5.00 (dq,  $J$  = 2.5, 1.4 Hz, 2H), 4.73 (dt,  $J$  = 2.6, 1.3 Hz, 1H), 4.54 (td,  $J$  = 2.6, 1.3 Hz, 1H), 4.47 (td,  $J$  = 2.5, 1.2 Hz, 1H), 4.43 – 4.38 (m, 2H), 3.97 (dt,  $J$  = 6.2, 2.9 Hz, 4H), 3.06 (d,  $J$  = 8.0 Hz, 2H), 2.89 (dt,  $J$  = 11.6, 4.5 Hz, 2H), 2.40 (s, 3H).

**<sup>13</sup>C NMR (100 MHz, CDCl<sub>3</sub>)**  $\delta$  201.4, 168.1, 148.4, 139.5, 139.0, 136.5, 136.2, 135.8, 131.3, 130.3, 128.4, 127.8, 127.7, 125.2, 121.8, 121.6, 117.7, 113.7, 80.3, 77.5, 75.8, 73.3, 73.0, 72.8, 68.7, 68.4, 66.5, 61.4, 55.1, 20.1.

**HRMS (ESI)**  $m/z$ :  $[M + Na]^+$  Calcd for C<sub>32</sub>H<sub>29</sub>FeN<sub>3</sub>O<sub>3</sub>Na 582.1450; found: 582.1452.

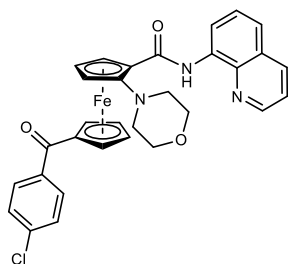

**1-Morpholino-2-((8-quinolinylamino)carbonyl)-1'-p-chlorophenylacetyl-ferrocene (3l)**

A purification by flash chromatography in petroleum ether : ethyl acetate= 4 : 1 to give **3l** as yellow foam (26.1 mg, 45%)

**<sup>1</sup>H NMR (400 MHz, Chloroform-*d*)**  $\delta$  12.11 (s, 1H), 8.93 (dd,  $J$  = 4.2, 1.7 Hz, 1H), 8.89 (dd,  $J$  = 7.0, 2.1 Hz, 1H), 8.21 (dd,  $J$  = 8.2, 1.7 Hz, 1H), 7.73 (d,  $J$  = 8.5 Hz, 2H), 7.62 – 7.55 (m, 2H), 7.52 (dd,  $J$  = 8.2, 4.2 Hz, 1H), 7.28 (d,  $J$  = 8.5 Hz, 2H), 5.08 (dt,  $J$  = 2.5, 1.3 Hz, 1H), 4.99 (dd,  $J$  = 2.7, 1.7 Hz, 1H), 4.89 (dt,  $J$  = 2.7, 1.3 Hz, 1H), 4.59 (td,  $J$  = 2.6, 1.3 Hz, 1H), 4.56 (td,  $J$  = 2.6, 1.2 Hz, 1H), 4.31 (p,  $J$  = 2.7 Hz, 2H), 4.03 – 3.90 (m, 4H), 3.04 (s, 2H), 2.88 (ddd,  $J$  = 11.5, 5.9, 3.4 Hz, 2H).

**<sup>13</sup>C NMR (100 MHz, CDCl<sub>3</sub>)**  $\delta$  196.8, 167.8, 148.3, 139.0, 138.2, 137.5, 136.5, 135.8, 129.8, 128.6, 128.4, 127.7, 121.8, 121.7, 117.7, 113.8, 79.3, 76.3, 75.7, 73.5, 73.4, 73.2, 69.0, 68.7, 66.5, 61.6, 55.0.

**HRMS (ESI)**  $m/z$ :  $[M + Na]^+$  Calcd for C<sub>31</sub>H<sub>26</sub>ClFeN<sub>3</sub>O<sub>3</sub>Na 602.0904; found: 602.0908.

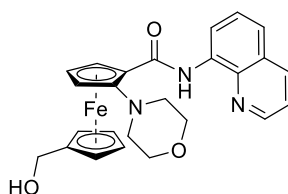

**1-Morpholino-2-((8-quinolinylamino)carbonyl)-1'-methanol-ferrocene (3m)**

A purification by flash chromatography in petroleum ether : ethyl acetate= 4 : 1 to give **3m** as yellow foam (34.4 mg, 73%)

**<sup>1</sup>H NMR (400 MHz, Chloroform-*d*)**  $\delta$  12.28 (s, 1H), 9.02 (d,  $J$  = 7.3 Hz, 1H), 8.95 (d,  $J$  = 4.2 Hz, 1H), 8.21 (d,  $J$  = 8.2 Hz, 1H), 7.62 – 7.48 (m, 3H), 4.99 (d,  $J$  = 2.6 Hz, 1H), 4.39 (d,  $J$  = 13.4 Hz, 3H), 4.30 – 4.24 (m, 2H), 4.21 (d,  $J$  = 5.6 Hz, 2H), 4.17 (d,  $J$  = 3.2 Hz, 1H), 4.14 – 3.96 (m, 5H), 3.11 (t,  $J$  = 8.8 Hz, 2H), 3.01 – 2.92 (m, 2H).



**<sup>13</sup>C NMR (101 MHz, CDCl<sub>3</sub>)** δ 170.7, 148.3, 139.1, 136.6, 135.8, 128.5, 127.8, 121.8, 118.2, 112.0, 92.1, 71.4, 70.2, 70.0, 69.2, 68.3, 67.0, 66.6, 61.2, 59.6, 55.7, 14.3.

**HRMS (ESI)** m/z: [M + Na]<sup>+</sup> Calcd for C<sub>25</sub>H<sub>25</sub>FeN<sub>3</sub>O<sub>3</sub>Na 494.1143; found: 494.1136.

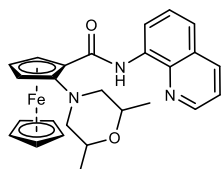

**1-(2,6-Dimethylmorpholino)-2-((8-quinolinylamino)carbonyl)ferrocene (4a)**

A purification by flash chromatography in petroleum ether : ethyl acetate= 4 : 1 to give **4a** as yellow foam (25.3mg, 54%).

**<sup>1</sup>H NMR (400 MHz, Chloroform-*d*)** δ 12.30 (s, 1H), 9.00 (dd, *J* = 7.7, 1.5 Hz, 1H), 8.89 (dd, *J* = 4.2, 1.7 Hz, 1H), 8.19 (dd, *J* = 8.3, 1.8 Hz, 1H), 7.59 (t, *J* = 7.9 Hz, 1H), 7.56 – 7.46 (m, 2H), 4.94 (t, *J* = 2.2 Hz, 1H), 4.46 (m, *J* = 12.7, 6.4, 2.2 Hz, 1H), 4.31 (d, *J* = 2.8 Hz, 2H), 4.21 (s, 5H), 4.03 (m, *J* = 12.5, 6.1, 3.1 Hz, 1H), 3.59 (dt, *J* = 11.0, 1.9 Hz, 1H), 2.89 (dt, *J* = 11.5, 2.0 Hz, 1H), 2.59 – 2.49 (m, 1H), 2.19 – 2.09 (m, 1H), 1.41 (d, *J* = 6.3 Hz, 3H), 0.99 (d, *J* = 6.3 Hz, 3H).

**<sup>13</sup>C NMR (100 MHz, CDCl<sub>3</sub>)** δ 169.6, 148.2, 139.2, 136.4, 136.3, 128.4, 127.7, 121.6, 121.2, 117.6, 111.9, 72.1, 71.2, 70.8, 67.1, 66.6, 63.7, 59.8, 58.4, 19.6, 19.0.

**HRMS (ESI)** m/z: [M]<sup>+</sup> Calcd for C<sub>26</sub>H<sub>27</sub>FeN<sub>3</sub>O<sub>2</sub> 469.1453; found: 469.1448.

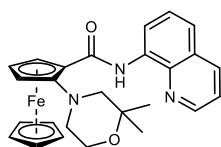

**1-(2,2-Dimethylmorpholino)-2-((8-quinolinylamino)carbonyl)ferrocene (4b)**

A purification by flash chromatography in petroleum ether : ethyl acetate= 4 : 1 to give **4b** as yellow foam (12.2 mg, 26%).

**<sup>1</sup>H NMR (400 MHz, Chloroform-*d*)** δ 11.59 (s, 1H), 8.94 – 8.88 (m, 2H), 8.20 (dd, *J* = 8.3, 1.7 Hz, 1H), 7.62 – 7.52 (m, 2H), 7.48 (dd, *J* = 8.3, 4.2 Hz, 1H), 4.90 (dd, *J* = 2.8, 1.6 Hz, 1H), 4.32 – 4.27 (m, 2H), 4.23 (s, 5H), 4.09 (m, *J* = 11.1, 7.5, 3.0 Hz, 1H), 3.95 – 3.79 (m, 1H), 3.03 – 2.80 (m, 3H), 2.64 (d, *J* = 11.2 Hz, 1H), 1.60 (s, 3H), 1.26 (s, 3H).

**<sup>13</sup>C NMR (100 MHz, CDCl<sub>3</sub>)** δ 169.6, 148.1, 139.3, 136.5, 135.6, 128.4, 127.6, 121.6, 121.5, 118.3, 112.6, 72.2, 71.5, 70.8, 67.3, 66.3, 63.9, 61.6, 59.3, 56.0, 26.2, 24.8.

**HRMS (ESI)** m/z: [M]<sup>+</sup> Calcd for C<sub>26</sub>H<sub>27</sub>FeN<sub>3</sub>O<sub>2</sub> 469.1453; found: 469.1450.

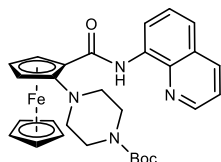

**1-(4-tert-Butoxycarbonyl piperazino)-2-((8-quinolinylamino)carbonyl)ferrocene (4c)**

A purification by flash chromatography in petroleum ether : ethyl acetate = 4 : 1 to give **4c** as yellow foam (24.3mg, 45%).

**<sup>1</sup>H NMR (400 MHz, Chloroform-*d*)** δ 12.31 (s, 1H), 9.00 (dd, *J* = 7.6, 1.4 Hz, 1H), 8.86 (dd, *J* = 4.2, 1.6 Hz, 1H), 8.19 (dd, *J* = 8.3, 1.7 Hz, 1H), 7.58 (t, *J* = 7.9 Hz, 1H), 7.55 – 7.45 (m, 2H), 4.94 (dd, *J* = 2.6, 1.6 Hz, 1H), 4.31 (d, *J* = 2.4 Hz, 2H), 4.22 (s, 5H), 3.75 (s, 4H), 2.88 (dt, *J* = 10.8, 5.0 Hz, 4H), 1.47 (s, 9H).

**<sup>13</sup>C NMR (100 MHz, CDCl<sub>3</sub>)** δ 169.6, 155.0, 148.1, 139.1, 136.5, 136.3, 128.5, 127.8, 121.7, 121.2, 117.5, 112.1, 80.0, 72.2, 70.9, 67.0, 66.6, 59.9, 54.8, 28.6.

**HRMS (ESI)** m/z: [M + Na]<sup>+</sup> Calcd for C<sub>29</sub>H<sub>32</sub>FeN<sub>4</sub>O<sub>3</sub>Na 563.1716; found: 563.1719.

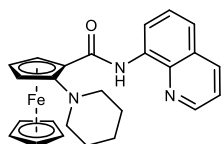

**1-Piperidino-2-((8-quinolinylamino)carbonyl)ferrocene (4d)**

A purification by flash chromatography in petroleum ether : tetrahydrofuran = 12 : 1 to give **4d** as yellow foam (37.3 mg, 85%).

**<sup>1</sup>H NMR (400 MHz, Chloroform-*d*)** δ 12.44 (s, 1H), 9.00 (d, *J* = 7.6 Hz, 1H), 8.91 (d, *J* = 3.2 Hz, 1H), 8.18 (d, *J* = 8.2 Hz, 1H), 7.58 (t, *J* = 7.9 Hz, 1H), 7.54 – 7.45 (m, 2H), 4.89 (s, 1H), 4.33 – 4.25 (m, 2H), 4.20 (s, 5H), 3.06 (s, 2H), 2.85 (m, *J* = 11.2, 5.4 Hz, 2H), 1.87 (t, *J* = 5.9 Hz, 4H), 1.58 (s, 2H).

**<sup>13</sup>C NMR (101 MHz, CDCl<sub>3</sub>)** δ 170.0, 147.9, 139.4, 136.8, 136.2, 128.4, 127.7, 121.6, 121.0, 117.5, 113.9, 72.3, 70.8, 66.6, 66.2, 59.3, 56.6, 25.8, 24.6.

**HRMS (ESI)** m/z:  $[M + H]^+$  Calcd for  $C_{25}H_{26}FeN_3O$  440.1347; found: 440.1422.

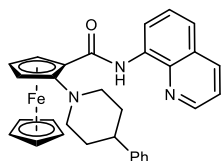

**1-(4-Phenylpiperidino)-2-((8-quinolinylamino)carbonyl)ferrocene (4e)**

A purification by flash chromatography in petroleum ether : ethyl acetate= 4 : 1 to give **4e** as yellow foam (30.9mg, 60%).

**$^1H$  NMR (400 MHz, Chloroform-*d*)**  $\delta$  12.43 (s, 1H), 8.99 (dd,  $J = 7.6, 1.4$  Hz, 1H), 8.90 (dd,  $J = 4.2, 1.7$  Hz, 1H), 8.21 (dd,  $J = 8.3, 1.7$  Hz, 1H), 7.60 (t,  $J = 7.9$  Hz, 1H), 7.53 (dd,  $J = 8.2, 1.4$  Hz, 1H), 7.47 (dd,  $J = 8.2, 4.2$  Hz, 1H), 7.28 (s, 2H), 7.24 (s, 1H), 7.20 (d,  $J = 7.2$  Hz, 1H), 7.12 (d,  $J = 6.9$  Hz, 2H), 4.91 (dd,  $J = 2.8, 1.6$  Hz, 1H), 4.35 (dd,  $J = 2.7, 1.6$  Hz, 1H), 4.30 (t,  $J = 2.7$  Hz, 1H), 4.23 (s, 5H), 3.94 (d,  $J = 11.4$  Hz, 1H), 3.20 (d,  $J = 11.8$  Hz, 1H), 2.88 (t,  $J = 11.4$  Hz, 1H), 2.70 – 2.59 (m, 1H), 2.52 (m,  $J = 11.8, 7.6, 3.1$  Hz, 2H), 2.14 (d,  $J = 12.3$  Hz, 1H), 2.07 – 1.94 (m, 1H), 1.65 (d,  $J = 12.7$  Hz, 1H).

**$^{13}C$  NMR (100 MHz,  $CDCl_3$ )**  $\delta$  169.9, 148.4, 146.3, 139.4, 136.4, 128.5, 128.5, 127.7, 127.0, 126.3, 121.4, 121.1, 117.6, 113.3, 72.4, 70.9, 66.6, 66.2, 59.2, 59.1, 53.3, 42.6, 33.6, 32.7.

**HRMS (ESI)** m/z:  $[M]^+$  Calcd for  $C_{31}H_{29}FeN_3O$  515.1660; found: 515.1656.

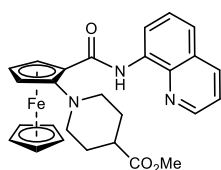

**1-(4-Methoxycarbonylpiperidino)-2-((8-quinolinylamino)carbonyl)ferrocene (4f)**

A purification by flash chromatography in petroleum ether : ethyl acetate= 4 : 1 to give **4f** as yellow foam (28.3 mg, 57%).

**$^1H$  NMR (400 MHz, Chloroform-*d*)**  $\delta$  12.32 (s, 1H), 9.03 (dd,  $J = 7.7, 1.5$  Hz, 1H), 9.00 (dd,  $J = 4.3, 1.7$  Hz, 1H), 8.17 (dd,  $J = 8.2, 1.8$  Hz, 1H), 7.57 (t,  $J = 7.9$  Hz, 1H), 7.53 – 7.47 (m, 2H), 4.92 (dd,  $J = 2.6, 1.7$  Hz, 1H), 4.31 – 4.27 (m, 2H), 4.20 (s, 5H), 3.76 (d,  $J = 11.3$  Hz, 1H), 3.69 (s, 3H), 3.11 (dt,  $J = 11.3, 3.7$  Hz, 1H), 2.74 (td,  $J = 11.2, 2.6$  Hz, 1H), 2.57 – 2.39 (m, 3H), 2.18 (m,  $J = 15.2, 7.3, 4.0$  Hz, 2H), 1.81 (d,  $J = 12.9$  Hz, 1H).

**<sup>13</sup>C NMR (100 MHz, CDCl<sub>3</sub>)** δ 175.8, 169.8, 148.5, 139.2, 136.5, 136.2, 128.4, 127.6, 121.6, 121.1, 117.4, 112.8, 72.2, 70.9, 66.9, 66.4, 59.5, 57.4, 52.7, 51.8, 41.3, 28.4, 28.0.

**HRMS (ESI)** m/z: [M]<sup>+</sup> Calcd for C<sub>27</sub>H<sub>27</sub>FeN<sub>3</sub>O<sub>3</sub> 497.1402; found: 497.1398.

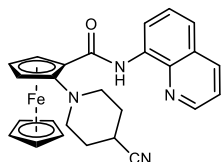

**1-(4-Cyanopiperidin-1-yl)-2-((8-quinolinylamino)carbonyl)ferrocene (4g)**

A purification by flash chromatography in petroleum ether : ethyl acetate = 4 : 1 to give **4g** as yellow foam (28.3mg, 61%).

**<sup>1</sup>H NMR (400 MHz, Chloroform-*d*)** δ 12.18 (s, 1H), 9.04 (dd, *J* = 7.6, 1.5 Hz, 1H), 8.94 (dd, *J* = 4.3, 1.7 Hz, 1H), 8.21 (dd, *J* = 8.2, 1.7 Hz, 1H), 7.59 (t, *J* = 7.9 Hz, 1H), 7.57 – 7.48 (m, 2H), 4.94 (dd, *J* = 2.7, 1.6 Hz, 1H), 4.31 (p, *J* = 2.7 Hz, 2H), 4.21 (s, 5H), 3.49 (s, 1H), 3.16 – 3.06 (m, 1H), 3.00 – 2.67 (m, 3H), 2.34 (qt, *J* = 8.7, 3.6 Hz, 3H), 2.16 (s, 1H).

**<sup>13</sup>C NMR (100 MHz, CDCl<sub>3</sub>)** δ 169.6, 148.0, 139.0, 136.6, 136.3, 128.5, 127.8, 122.0, 121.8, 121.3, 117.6, 112.1, 72.2, 70.9, 67.1, 66.6, 59.8, 28.8, 28.6, 26.4.

**HRMS (ESI)** m/z: [M]<sup>+</sup> Calcd for C<sub>26</sub>H<sub>24</sub>FeN<sub>4</sub>O 464.1300; found: 464.1292.

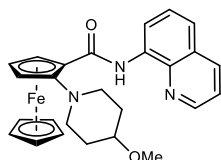

**1-(4-Methoxypiperidino)-2-((8-quinolinylamino)carbonyl)ferrocene (4h)**

A purification by flash chromatography in petroleum ether : ethyl acetate = 4 : 1 to give **4h** as yellow foam (26.3 mg, 56%).

**<sup>1</sup>H NMR (400 MHz, Chloroform-*d*)** δ 12.42 (s, 1H), 9.03 (dd, *J* = 7.6, 1.4 Hz, 1H), 8.94 (dd, *J* = 4.2, 1.7 Hz, 1H), 8.17 (dd, *J* = 8.3, 1.7 Hz, 1H), 7.57 (t, *J* = 7.9 Hz, 1H), 7.54 – 7.44 (m, 2H), 4.92 (dd, *J* = 2.8, 1.6 Hz, 1H), 4.31 (dd, *J* = 2.7, 1.5 Hz, 1H), 4.28 (t, *J* = 2.7 Hz, 1H), 4.20 (s, 5H), 3.37 (s, 5H), 3.09 (dt, *J* = 10.1, 4.3 Hz, 1H), 2.76 (m, *J* = 11.7, 8.8, 3.4 Hz, 2H), 2.21 – 2.00 (m, 4H).

**<sup>13</sup>C NMR (100 MHz, CDCl<sub>3</sub>)** δ 169.9, 148.1, 139.2, 136.5, 136.2, 128.4, 127.6, 121.7, 121.1, 117.5, 112.8, 72.2, 70.8, 66.7, 66.4, 59.6, 55.8, 52.3, 30.7, 30.6.

**HRMS (ESI)** m/z: [M]<sup>+</sup> Calcd for C<sub>26</sub>H<sub>27</sub>FeN<sub>3</sub>O<sub>2</sub> 469.1453; found: 469.1449.

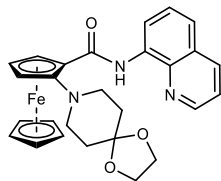

**1-(1,4-Dioxo-8-azaspiro[4.5]decane)-2-((8-quinolinylamino)carbonyl)ferrocene (4i)**

A purification by flash chromatography in petroleum ether : ethyl acetate= 4 : 1 to give **4i** as yellow foam (31.3 mg, 63%).

**<sup>1</sup>H NMR (400 MHz, Chloroform-*d*)** δ 12.45 (s, 1H), 9.06 (dd, *J* = 7.7, 1.5 Hz, 1H), 8.98 (dd, *J* = 4.2, 1.7 Hz, 1H), 8.17 (dd, *J* = 8.3, 1.7 Hz, 1H), 7.57 (t, *J* = 7.9 Hz, 1H), 7.53 – 7.47 (m, 2H), 4.93 (dd, *J* = 2.9, 1.5 Hz, 1H), 4.34 (t, *J* = 2.1 Hz, 1H), 4.29 (t, *J* = 2.7 Hz, 1H), 4.20 (s, 5H), 4.00 (s, 4H), 3.21 (s, 2H), 3.02 (dt, *J* = 11.3, 5.5 Hz, 2H), 2.23 – 1.98 (m, 4H).

**<sup>13</sup>C NMR (100 MHz, CDCl<sub>3</sub>)** δ 169.9, 148.1, 139.2, 136.6, 136.3, 128.4, 127.7, 121.8, 121.1, 117.4, 112.4, 107.5, 72.1, 70.9, 66.8, 66.5, 64.5, 60.0, 53.7, 34.9.

**HRMS (ESI)** m/z: [M]<sup>+</sup> Calcd for C<sub>27</sub>H<sub>27</sub>FeN<sub>3</sub>O<sub>3</sub> 497.1402; found: 497.1394.

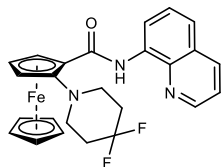

**1-(4,4-Difluoropiperidino)-2-((8-quinolinylamino)carbonyl)ferrocene (4j)**

A purification by flash chromatography in petroleum ether : ethyl acetate= 4 : 1 to give **4j** as yellow foam (10.9 mg, 23%).

**<sup>1</sup>H NMR (400 MHz, Chloroform-*d*)** δ 12.27 (s, 1H), 9.08 (dd, *J* = 7.7, 1.5 Hz, 1H), 8.87 (dd, *J* = 4.3, 1.7 Hz, 1H), 8.20 (dd, *J* = 8.2, 1.7 Hz, 1H), 7.59 (t, *J* = 7.9 Hz, 1H), 7.56 – 7.47 (m, 2H), 4.96 (t, *J* = 2.2 Hz, 1H), 4.33 (d, *J* = 2.2 Hz, 2H), 4.21 (s, 5H), 3.26 (s, 2H), 3.04 (m, *J* = 11.7, 7.0, 4.4 Hz, 2H), 2.58 – 2.24 (m, 4H).

**<sup>13</sup>C NMR (100 MHz, CDCl<sub>3</sub>)** δ 169.6, 147.8, 139.0, 136.6, 136.3, 128.5, 127.8, 121.8, 121.3, 117.6, 111.4, 72.2, 70.9, 67.1, 66.7, 60.1, 34.4, 34.2, 33.9.

**HRMS (ESI)** m/z: [M + Na]<sup>+</sup> Calcd for C<sub>25</sub>H<sub>23</sub>F<sub>2</sub>FeN<sub>3</sub>ONa 498.1051; found: 498.1054.

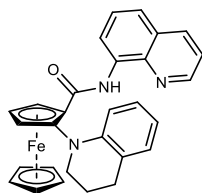

**1-(1,2,3,4-Tetrahydroquinolino)-2-((8-quinolinylamino)carbonyl)ferrocene (4k)**

A purification by flash chromatography in petroleum ether : tetrahydrofuran = 12 : 1 to give **4k** as yellow foam (2.4 mg, trace).

**<sup>1</sup>H NMR (400 MHz, Chloroform-*d*)**  $\delta$  11.35 (s, 1H), 8.84 (dd,  $J$  = 7.7, 1.4 Hz, 1H), 8.68 (dd,  $J$  = 4.2, 1.7 Hz, 1H), 8.09 (dd,  $J$  = 8.3, 1.7 Hz, 1H), 7.50 (t,  $J$  = 7.9 Hz, 1H), 7.43 (dd,  $J$  = 8.3, 1.4 Hz, 1H), 7.39 (dd,  $J$  = 8.3, 4.2 Hz, 1H), 6.98 – 6.91 (m, 1H), 6.79 (t,  $J$  = 7.8 Hz, 1H), 6.58 (t,  $J$  = 7.3 Hz, 1H), 6.36 (d,  $J$  = 8.3 Hz, 1H), 5.11 (dd,  $J$  = 2.9, 1.6 Hz, 1H), 4.53 – 4.44 (m, 2H), 4.34 (s, 5H), 4.31 (dd,  $J$  = 2.7, 1.6 Hz, 1H), 3.76 (td,  $J$  = 10.6, 3.1 Hz, 1H), 2.98 (m,  $J$  = 11.4, 5.6 Hz, 2H), 2.85 (m,  $J$  = 11.0, 10.0, 5.3 Hz, 1H), 2.21 (d,  $J$  = 5.4 Hz, 1H).

**<sup>13</sup>C NMR (101 MHz, CDCl<sub>3</sub>)**  $\delta$  169.1, 147.7, 139.3, 138.5, 136.2, 135.0, 131.9, 128.6, 128.2, 127.6, 126.7, 124.6, 121.5, 121.4, 121.2, 119.1, 117.3, 115.0, 74.8, 71.2, 67.6, 67.0, 65.2, 53.6, 27.8, 22.8.

**HRMS (ESI)**  $m/z$ : [M + H]<sup>+</sup> Calcd for C<sub>29</sub>H<sub>26</sub>FeN<sub>3</sub>O 488.1347; found: 488.1415.

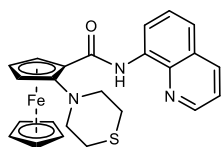

**1-Thiomorpholino-2-((8-quinolinylamino)carbonyl)ferrocene (4l)**

A purification by flash chromatography in petroleum ether : ethyl acetate = 4 : 1 to give **4l** as yellow foam (13.3mg, 29%).

**<sup>1</sup>H NMR (400 MHz, Chloroform-*d*)**  $\delta$  12.29 (s, 1H), 9.10 – 8.99 (m, 2H), 8.21 (dd,  $J$  = 8.2, 1.7 Hz, 1H), 7.59 (t,  $J$  = 7.9 Hz, 1H), 7.55 – 7.49 (m, 2H), 4.94 (dd,  $J$  = 2.8, 1.6 Hz, 1H), 4.32 (t,  $J$  = 2.8 Hz, 1H), 4.29 (dd,  $J$  = 2.8, 1.6 Hz, 1H), 4.20 (s, 5H), 3.46 (s, 2H), 3.12 (m,  $J$  = 21.0, 10.0 Hz, 6H).

**<sup>13</sup>C NMR (100 MHz, CDCl<sub>3</sub>)**  $\delta$  169.6, 148.1, 139.0, 136.5, 136.4, 128.5, 127.8, 121.8, 121.2, 117.5, 113.6, 72.1, 70.9, 66.9, 66.7, 60.3, 57.5, 27.6.

**HRMS (ESI)**  $m/z$ : [M + Na]<sup>+</sup> Calcd for C<sub>24</sub>H<sub>23</sub>FeN<sub>3</sub>OSNa 480.0803; found: 480.0804.

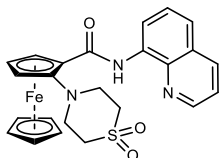

**1-(4,4-Dioxidothiomorpholino)-2-((8-quinolinylamino)carbonyl)ferrocene (4m)**

A purification by flash chromatography in petroleum ether : ethyl acetate = 4 : 1 to give **4m** as yellow foam (32.8 mg, 67%).

**<sup>1</sup>H NMR (400 MHz, Chloroform-*d*)**  $\delta$  12.02 (s, 1H), 9.12 (dd,  $J = 7.5, 1.6$  Hz, 1H), 9.06 (dd,  $J = 4.3, 1.7$  Hz, 1H), 8.24 (dd,  $J = 8.3, 1.7$  Hz, 1H), 7.61 (t,  $J = 7.8$  Hz, 2H), 7.59 – 7.51 (m, 2H), 5.02 (dd,  $J = 2.9, 1.5$  Hz, 1H), 4.39 (t,  $J = 2.8$  Hz, 1H), 4.35 (dd,  $J = 2.7, 1.5$  Hz, 1H), 4.23 (s, 5H), 3.73 (s, 4H), 3.46 (d,  $J = 9.4$  Hz, 4H).

**<sup>13</sup>C NMR (100 MHz, CDCl<sub>3</sub>)**  $\delta$  169.0, 148.4, 138.8, 137.1, 136.0, 128.6, 127.9, 122.1, 121.7, 117.8, 110.8, 72.0, 71.1, 67.6, 67.2, 61.0, 53.8, 51.9.

**HRMS (ESI)**  $m/z$ : [M + Na]<sup>+</sup> Calcd for C<sub>24</sub>H<sub>23</sub>FeN<sub>3</sub>O<sub>3</sub>Na 512.0702; found: 512.0700.

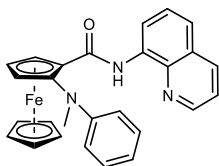

**1-(N-Methylphenyl)-2-((8-quinolinylamino)carbonyl)ferrocene (4n)**

A purification by flash chromatography in petroleum ether : tetrahydrofuran = 12 : 1 to give **4n** as yellow foam (8.3 mg, 18%).

**<sup>1</sup>H NMR (400 MHz, Chloroform-*d*)**  $\delta$  11.69 (s, 1H), 8.82 – 8.76 (m, 2H), 8.10 (dd,  $J = 8.2, 1.7$  Hz, 1H), 7.49 (t,  $J = 7.9$  Hz, 1H), 7.45 – 7.39 (m, 2H), 7.06 (dd,  $J = 8.8, 7.2$  Hz, 2H), 6.78 (d,  $J = 7.8$  Hz, 2H), 6.69 (t,  $J = 7.3$  Hz, 1H), 5.09 (dd,  $J = 2.9, 1.5$  Hz, 1H), 4.51 (t,  $J = 2.8$  Hz, 1H), 4.35 (s, 6H), 3.88 (s, 3H).

**<sup>13</sup>C NMR (100 MHz, CDCl<sub>3</sub>)**  $\delta$  168.6, 150.9, 148.1, 139.1, 136.1, 135.7, 128.6, 128.1, 127.6, 121.5, 120.9, 119.5, 116.6, 116.3, 107.3, 74.1, 71.2, 67.3, 67.1, 65.4, 44.1.

**HRMS (ESI)**  $m/z$ : [M + Na]<sup>+</sup> Calcd for C<sub>27</sub>H<sub>23</sub>FeN<sub>3</sub>ONa 484.1083; found: 484.1086.

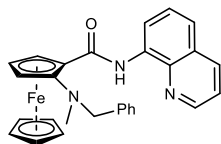

**1-(N-Benzylmethyl)-2-((8-quinolinylamino)carbonyl)ferrocene (4o)**

A purification by flash chromatography in petroleum ether : tetrahydrofuran = 12 : 1 to give **4o** as yellow foam (7.1 mg, 15%).

**<sup>1</sup>H NMR (400 MHz, Chloroform-*d*)**  $\delta$  12.27 (s, 1H), 8.93 (d,  $J$  = 7.6 Hz, 1H), 8.59 (dd,  $J$  = 4.2, 1.7 Hz, 1H), 8.16 (dd,  $J$  = 8.2, 1.7 Hz, 1H), 7.58 (t,  $J$  = 7.9 Hz, 1H), 7.52 (d,  $J$  = 8.2 Hz, 1H), 7.45 – 7.38 (m, 3H), 7.26 – 7.19 (m, 3H), 4.95 (s, 1H), 4.49 (d,  $J$  = 13.1 Hz, 1H), 4.32 (s, 1H), 4.26 (s, 6H), 3.85 (d,  $J$  = 13.1 Hz, 1H), 2.71 (s, 3H).

**<sup>13</sup>C NMR (100 MHz, CDCl<sub>3</sub>)**  $\delta$  169.7, 148.9, 148.3, 139.5, 137.2, 136.1, 129.9, 128.3, 128.2, 127.6, 127.4, 121.4, 121.2, 117.7, 113.3, 72.5, 70.9, 66.9, 66.3, 62.9, 60.5, 43.9.

**HRMS (ESI)**  $m/z$ : [M]<sup>+</sup> Calcd for C<sub>28</sub>H<sub>25</sub>FeN<sub>3</sub>O 475.1347; found: 475.1340.

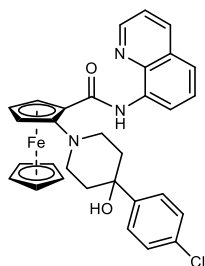

**1-(4-(4-Chlorophenyl)-4-hydroxypiperidin-1-yl)-2-((8-quinolinylamino)carbonyl)ferrocene (4p)**

A purification by flash chromatography in petroleum ether : ethyl acetate = 4 : 1 to give **4p** as yellow foam (35.6 mg, 63%).

**<sup>1</sup>H NMR (400 MHz, Chloroform-*d*)**  $\delta$  12.41 (s, 1H), 8.96 (d,  $J$  = 7.5 Hz, 1H), 8.71 (d,  $J$  = 2.6 Hz, 1H), 8.21 (d,  $J$  = 8.3 Hz, 1H), 7.59 (t,  $J$  = 7.9 Hz, 1H), 7.53 (d,  $J$  = 8.2 Hz, 1H), 7.43 (dd,  $J$  = 8.2, 4.2 Hz, 1H), 7.28 (d,  $J$  = 8.7 Hz, 3H), 7.23 (d,  $J$  = 8.6 Hz, 3H), 4.89 (s, 1H), 4.38 (s, 1H), 4.30 (t,  $J$  = 2.7 Hz, 1H), 4.21 (s, 5H), 3.68 (d,  $J$  = 10.7 Hz, 1H), 3.31 – 3.20 (t, 1H), 2.99 – 2.86 (m, 2H), 2.71 (m,  $J$  = 12.7, 4.4 Hz, 1H), 2.41 – 2.29 (m, 1H), 2.13 – 2.02 (m, 1H), 1.88 (s, 1H), 1.60 (d,  $J$  = 13.5 Hz, 1H).

**<sup>13</sup>C NMR (100 MHz, CDCl<sub>3</sub>)**  $\delta$  170.0, 148.2, 147.0, 139.4, 136.6, 136.3, 133.0, 128.6, 128.4, 127.8,



126.4, 121.3, 121.2, 117.8, 112.9, 72.2, 71.0, 70.9, 66.7, 66.4, 59.6, 53.9, 48.6, 38.7, 37.8.

**HRMS (ESI)** m/z:  $[M]^+$  Calcd for  $C_{31}H_{28}ClFeN_3O_2$  565.1219; found: 565.1215.

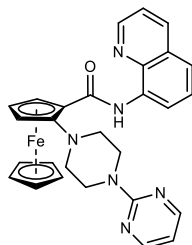

**1-(4-(Pyrimidin-2-yl)piperazin-1-yl)-2-((8-quinolinylamino)carbonyl)ferrocene (4q)**

A purification by flash chromatography in petroleum ether : ethyl acetate = 4 : 1 to give **4q** as yellow foam (31.1 mg, 60%).

**$^1H$  NMR (400 MHz, Chloroform-*d*)**  $\delta$  12.43 (s, 1H), 9.02 (d,  $J$  = 7.7 Hz, 1H), 8.82 (d,  $J$  = 2.5 Hz, 1H), 8.32 (d,  $J$  = 4.7 Hz, 2H), 8.16 (d,  $J$  = 6.6 Hz, 1H), 7.59 (t,  $J$  = 7.9 Hz, 1H), 7.51 (d,  $J$  = 6.8 Hz, 1H), 7.42 (dd,  $J$  = 8.3, 4.2 Hz, 1H), 6.50 (t,  $J$  = 4.8 Hz, 1H), 4.95 (s, 1H), 4.31 (s, 2H), 4.24 (s, 5H), 4.19 m,  $J$  = 6.3, 3.3 Hz, 4H), 3.17 (m,  $J$  = 10.7, 5.0 Hz, 2H), 2.99 (m,  $J$  = 10.8, 4.9 Hz, 2H).

**$^{13}C$  NMR (100 MHz,  $CDCl_3$ )**  $\delta$  169.7, 161.8, 157.9, 148.1, 139.2, 136.4, 128.5, 127.8, 121.7, 121.2, 117.6, 112.2, 110.0, 100.9, 72.3, 70.9, 67.1, 66.6, 59.9, 55.0, 43.6.

**HRMS (ESI)** m/z:  $[M + Na]^+$  Calcd for  $C_{28}H_{26}FeN_6ONa$  541.1410; found: 541.1412.

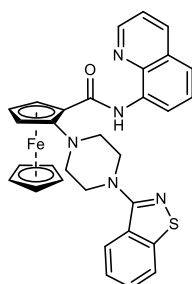

**1-(4-(Benzo[d]isothiazol-3-yl)piperazin-1-yl)-2-((8-quinolinylamino)carbonyl)ferrocene (4r)**

A purification by flash chromatography in petroleum ether : ethyl acetate = 4 : 1 to give **4r** as yellow foam (40.1 mg, 70%).

**$^1H$  NMR (400 MHz, Chloroform-*d*)**  $\delta$  12.40 (s, 1H), 9.02 (d,  $J$  = 6.3 Hz, 1H), 8.96 (d,  $J$  = 2.6 Hz, 1H), 8.15 (d,  $J$  = 8.2 Hz, 1H), 7.92 (d,  $J$  = 8.2 Hz, 1H), 7.83 (d,  $J$  = 8.1 Hz, 1H), 7.57 (t,  $J$  = 7.9 Hz,

1H), 7.54 – 7.41 (m, 3H), 7.35 (t,  $J = 7.5$  Hz, 1H), 4.98 (s, 1H), 4.41 (s, 1H), 4.35 (t,  $J = 2.8$  Hz, 1H), 4.25 (s, 5H), 3.93 (t,  $J = 5.0$  Hz, 4H), 3.41 – 3.32 (m, 2H), 3.24 – 3.14 (m, 2H).

**$^{13}\text{C}$  NMR (100 MHz,  $\text{CDCl}_3$ )**  $\delta$  169.7, 164.2, 152.9, 148.6, 139.1, 136.4, 136.3, 127.7, 127.7, 124.1, 124.0, 121.8, 121.2, 120.7, 117.5, 112.1, 72.3, 70.9, 67.1, 66.6, 60.0, 55.0, 49.9.

**HRMS (ESI)**  $m/z$ :  $[\text{M} + \text{Na}]^+$  Calcd for  $\text{C}_{31}\text{H}_{27}\text{FeN}_5\text{OSNa}$  596.1178; found: 596.1181.

## 6. Gram-scale synthesis

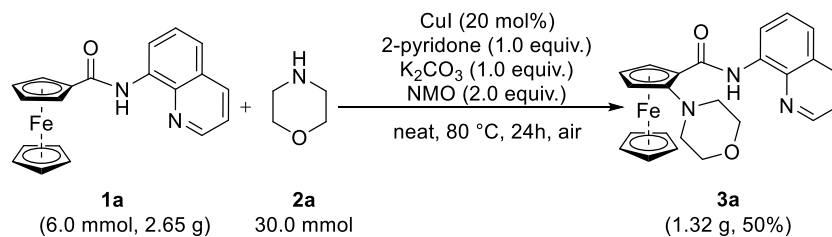

### Procedure for 6 mmol scale reaction of **1a**:

To a 50 mL Schlenk tube was added **1a** (6 mmol), **2a** (30.0 mmol), K<sub>2</sub>CO<sub>3</sub> (840.0 mg, 1.0 equiv), CuI (228 mg, 20 mol %), NMO (1.4 g, 2.0 equiv) and 2-pyridone (570 mg, 1.0 equiv). The reaction mixture was stirred at 80 °C (aluminum heat transfer block) for 24 h. After cooling to room temperature, the mixture was diluted with DCM, The crude mixture was purified by flash column chromatography on silica gel (hexanes/ethyl acetate = 10:1 to 4:1) affording the desired product **3a** as yellow solid, 1.32 g, 50% yield.

## 7. Removal of directing group.

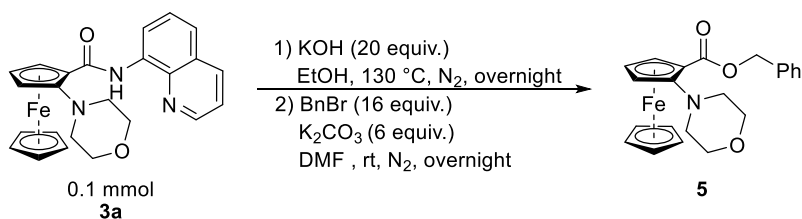

The product **3a** (44.1 mg, 0.1 mmol, 1.0 equiv.) was dissolved in MeOH (1 mL) and KOH (1.12g, 20 mmol, 20.0 equiv.) was added. The reaction mixture was refluxed with stirring for 12 h (The reaction was detected by TLC). The reaction mixture was cooled to room temperature and extracted with ethyl acetate (30 mL) and water (2 × 30 mL). The combined aqueous phase was acidified with 2 M HCl to pH = 2 and extracted with ether (3 × 30 mL). The combined ether phase was washed with brine (45 mL) and dried with Na<sub>2</sub>SO<sub>4</sub> and was concentrated under reduced pressure to give the crude product that used directly in the next step.

K<sub>2</sub>CO<sub>3</sub> (0.6 mmol), DMF (2.0 mL) and (bromomethyl)benzene (1.6 mmol) were charged in reaction vessel equipped with magnetic stirring bar under nitrogen atmosphere. The mixture was stirred at rt for 12 h. Ethyl acetate (10 mL) and 10% aqueous Na<sub>2</sub>S<sub>2</sub>O<sub>3</sub> (20 mL) were added to the mixture and the organic phase extracted by three portions of EtOAc. Combined organic layer was dried over MgSO<sub>4</sub> and the solvent evaporated in vacuo. Further purification was carried out by silica gel column chromatography using EtOAc/hexane to afford the desired **5** (30.4 mg, 75% yield).

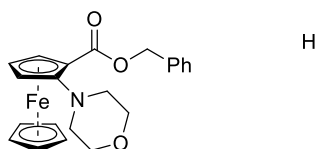

### **Benzyl 2-morpholinoferrocenezoate (5).**

**<sup>1</sup>H NMR (400 MHz, Chloroform-*d*)** δ 7.45 (d, *J* = 6.7 Hz, 2H), 7.40 (t, *J* = 7.2 Hz, 2H), 7.34 (t, *J* = 7.1 Hz, 1H), 5.32 (d, *J* = 12.4 Hz, 1H), 5.20 (d, *J* = 12.4 Hz, 1H), 4.73 (dd, *J* = 2.8, 1.6 Hz, 1H), 4.25 (dd, *J* = 2.8, 1.7 Hz, 1H), 4.18 (s, 6H), 3.79 (t, *J* = 4.7 Hz, 4H), 3.08 (m, *J* = 10.1, 4.9 Hz, 2H), 2.91 – 2.81 (m, 2H).

**<sup>13</sup>C NMR (100 MHz, CDCl<sub>3</sub>)** δ 171.4, 136.7, 128.7, 128.3, 128.3, 114.5, 69.7, 68.9, 67.1, 65.9, 65.8, 62.2, 61.7, 53.7.

**HRMS (ESI)** *m/z*: [M + H]<sup>+</sup> Calcd for C<sub>22</sub>H<sub>24</sub>FeNO<sub>3</sub> 406.1107; found: 406.1098.

## 8. Mechanistic Experiments.

### 8.1 Synthesis of deuterated substrate.

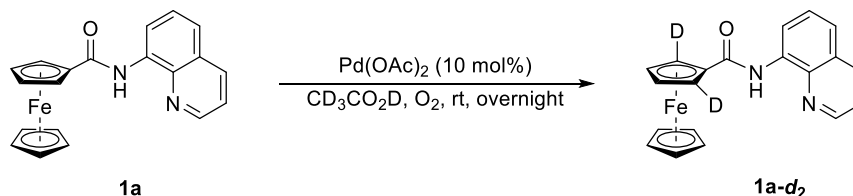

**1a** (1.0 mmol), CD<sub>3</sub>CO<sub>2</sub>D (10 ml) and Pd(OAc)<sub>2</sub> (10 mol %) were charged in reaction vessel equipped with magnetic stirring bar under O<sub>2</sub> atmosphere. The mixture was at rt. for 12 h. Ethyl acetate (10 mL) and 10% aqueous NaHCO<sub>3</sub> (10 mL) were added to the mixture and the organic phase extracted by three portions of EtOAc. Combined organic layer was dried over magnesium sulfate and the solvent evaporated in vacuo. Further purification was carried out by silica gel column chromatography using EtOAc/hexane to afford the desired **2a** (27.3 mg, 81% yield).

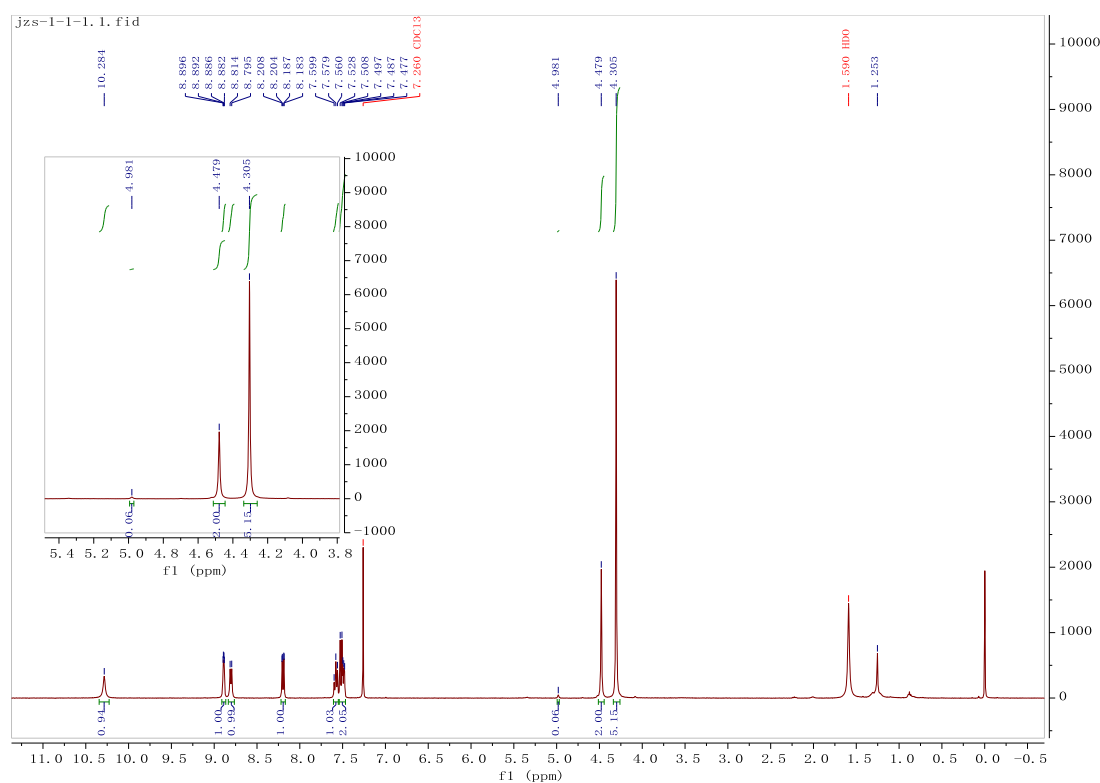

## 8.2 H/D exchange experiment

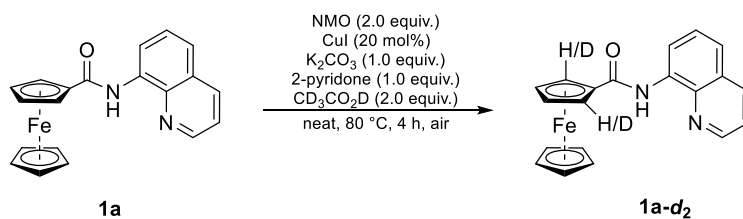

To a 10 mL Schlenk tube was added **1a** (0.1 mmol),  $\text{CD}_3\text{CO}_2\text{D}$  (0.2 mmol),  $\text{K}_2\text{CO}_3$  (14.0 mg, 1.0 equiv),  $\text{CuI}$  (3.8 mg, 20 mol %),  $\text{NMO}$  (23.4 mg, 2.0 equiv) and 2-pyridone (9.5 mg, 1.0 equiv), stirred at 80 °C (aluminum heat transfer block) for 4 h. After cooling to room temperature, the mixture was diluted with DCM, the resulting residue was purified by preparative TLC using Hexane/EtOAc as the eluent to afford the desired product. No H/D exchange was observed at the *ortho*-position of **1a**.

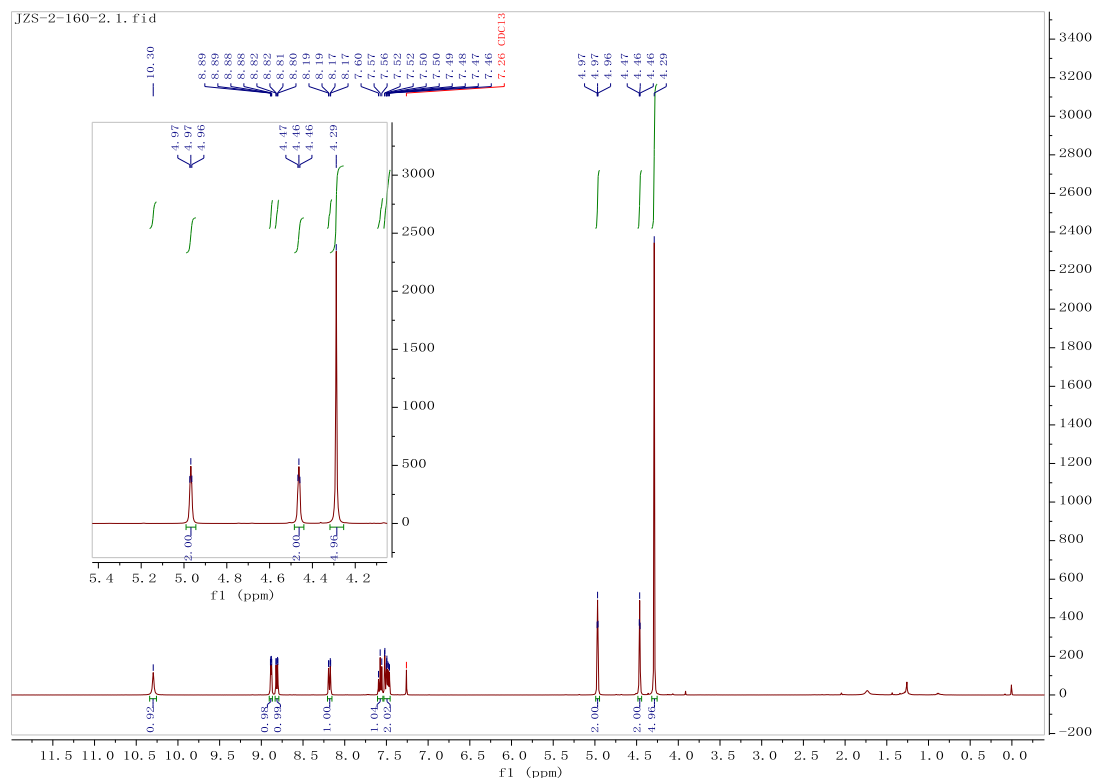

### 8.3 KIE experiment

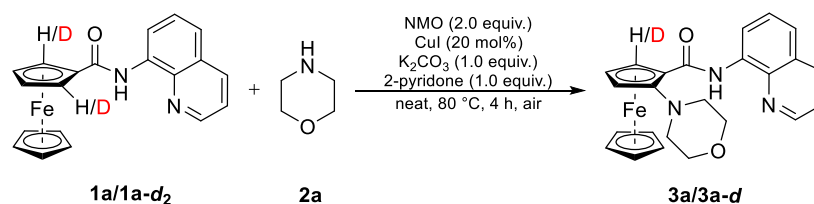

To a 50 mL Schlenk tube was added **1a** (0.1 mmol), or **1a-d<sub>2</sub>** (0.1 mmol), **2a** (0.5 mmol), K<sub>2</sub>CO<sub>3</sub> (14.0 mg, 1.0 equiv), CuI (3.8 mg, 20 mol %), NMO (23.4 mg, 2.0 equiv) and 2-pyridone (9.5 mg, 1.0 equiv), the tube was sealed up a cap and evacuated then refilled with air and kept stirring at 80 °C (aluminum heat transfer block). Then immediately quenched with DCM. The corresponding yield of each product was determined by <sup>1</sup>H NMR. A whole set of experiments was performed two times and their average values were used for the KIE calculation. KIE =  $k_{\text{H}}/k_{\text{D}}$  = 2.4.

| Time (min)  | 1 | 5 | 10  | 15 | 25 | 35  |
|-------------|---|---|-----|----|----|-----|
| <b>3a</b>   | 0 | 6 | 13  | 25 | 40 | --- |
| <b>3a-d</b> | 0 | 2 | --- | 7  | 15 | 25  |

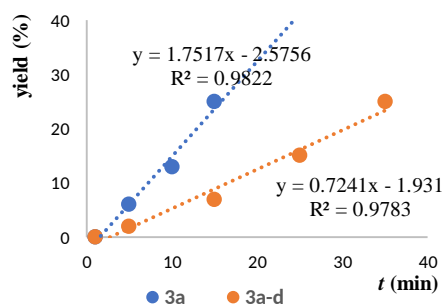

## 9. References.

- 1) Sattar, M.; Praveen, C.; Prasad, D.; Verma, A.; Kumar, S.; Kumar, S. *Adv. Synth. Catal.* **2016**, 358, 240.
- 2) Ivan, S.; Jakub, V.; Dusan, B.; Andrej, K. *Tetrahedron*. **2015** 71 8876-8884.
- 3) Daniela, H.; Harald, H.; and Peter, G. *J. Med. Chem.* **2009**, 52, 6860–6870.
- 4) Zubeda, B.; Bhavana, D.; Sridharb, B.; Basireddy, V.; Subba, R. *Synthesis*. **2018**, 50, 4089–4096.
- 5) Siu, Juno C.; Parry, Joseph B.; and Lin, S. *J. Am. Chem. Soc.* **2019**, 141, 2825–2831.



## 10. NMR Spectra.

### 2b-<sup>1</sup>H NMR

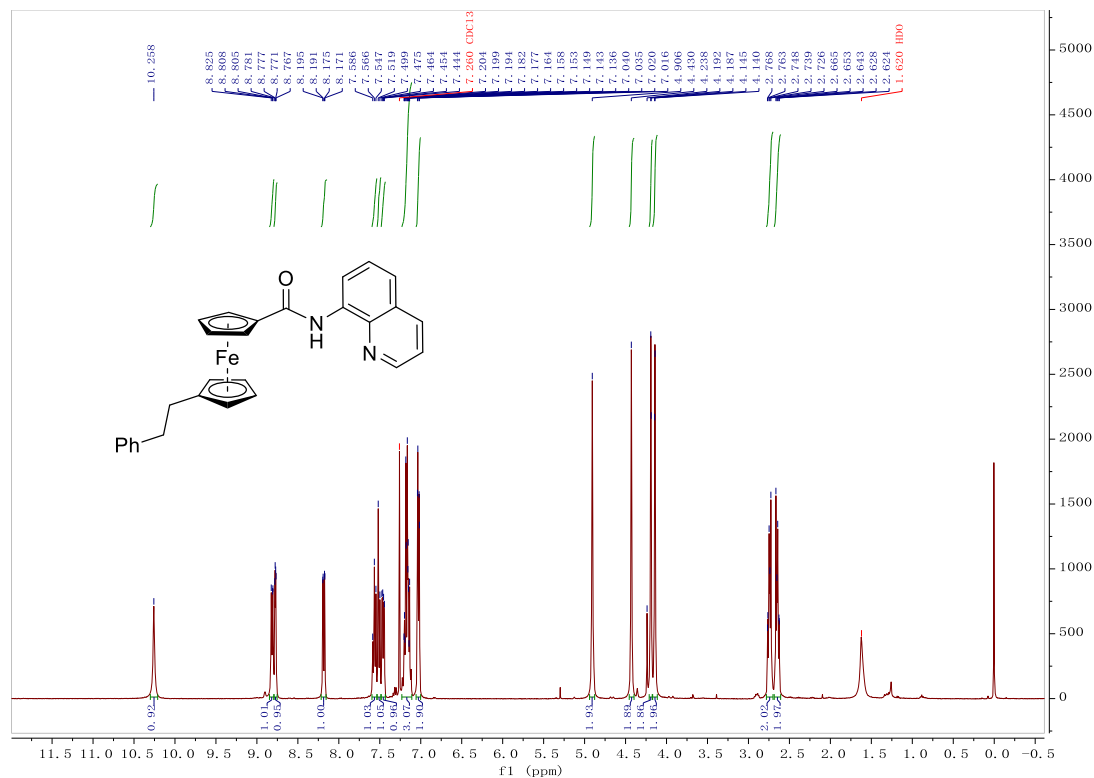

### 2b-<sup>13</sup>C NMR

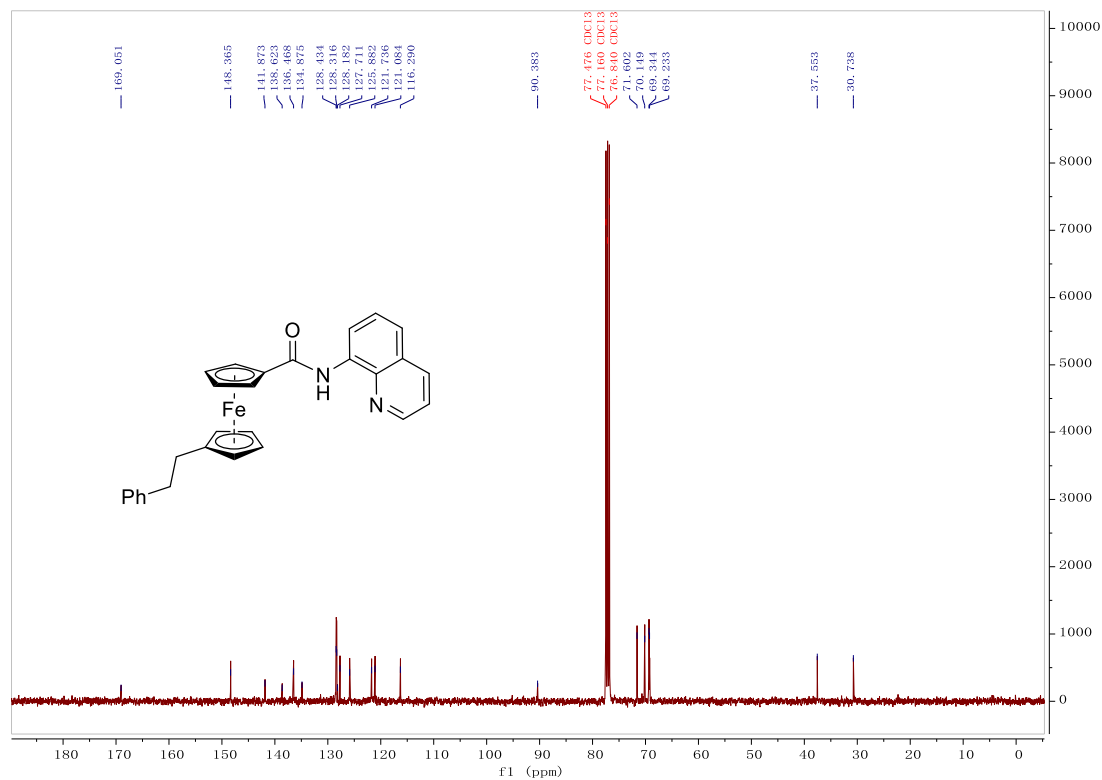

## 2c-<sup>1</sup>H NMR

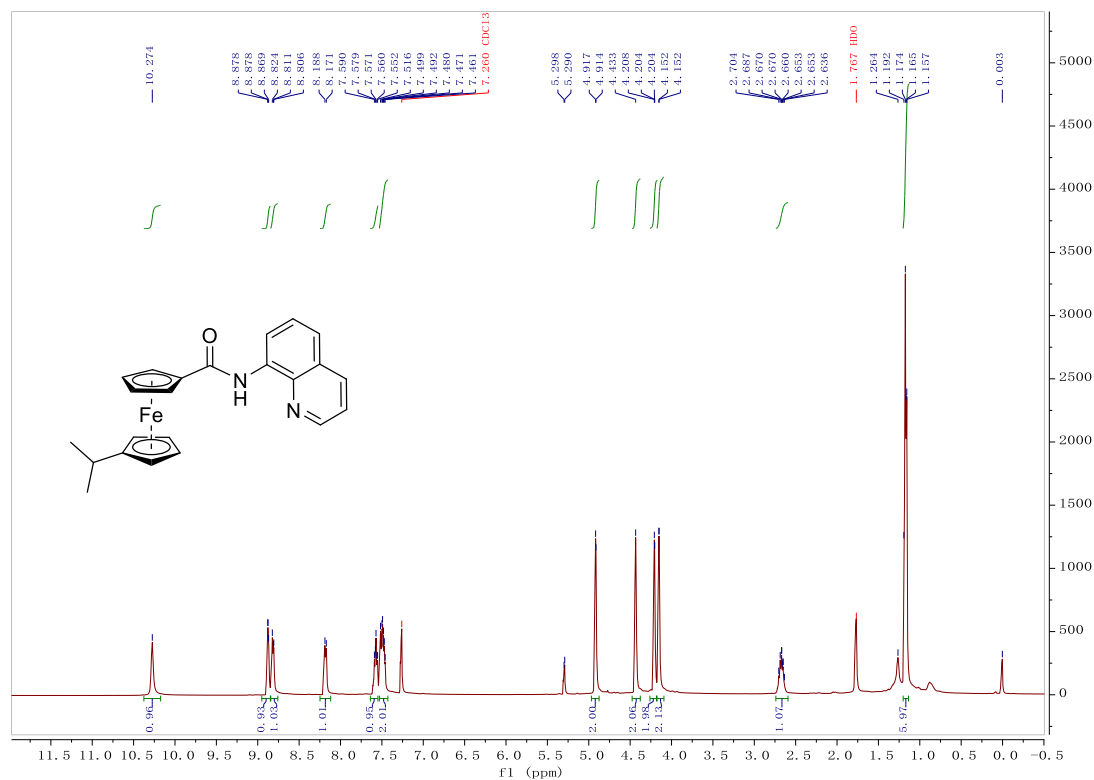

## 2c-<sup>13</sup>C NMR

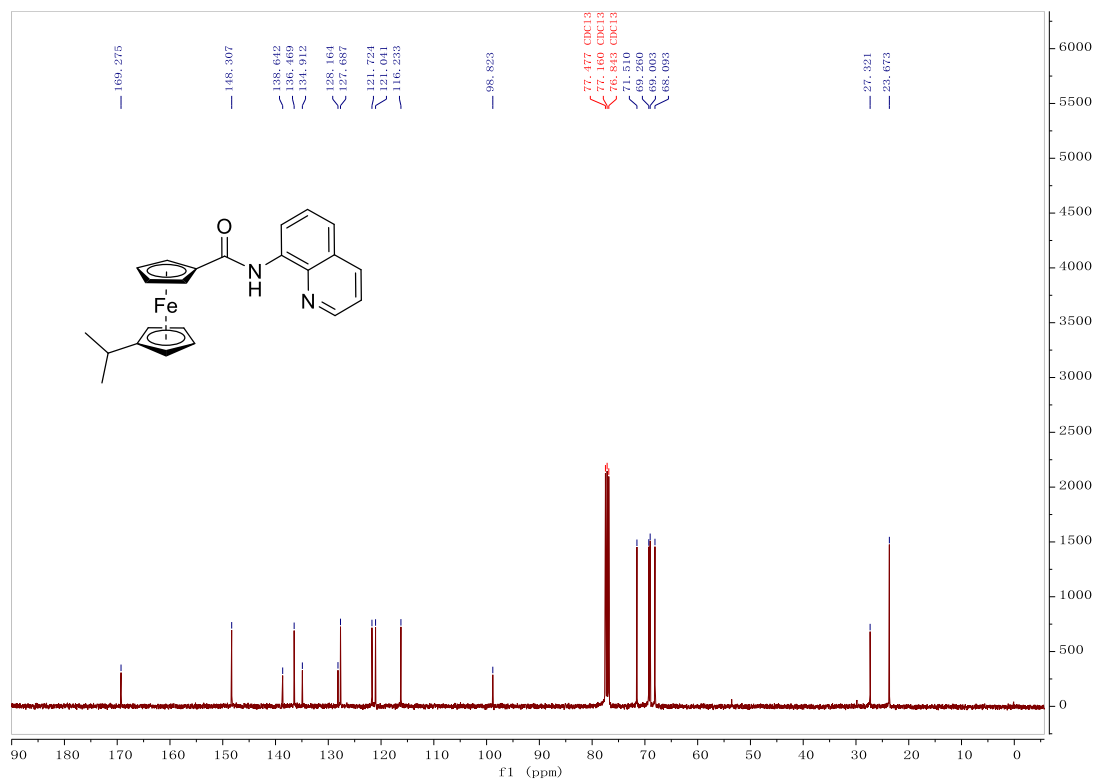

## 2d-<sup>1</sup>H NMR

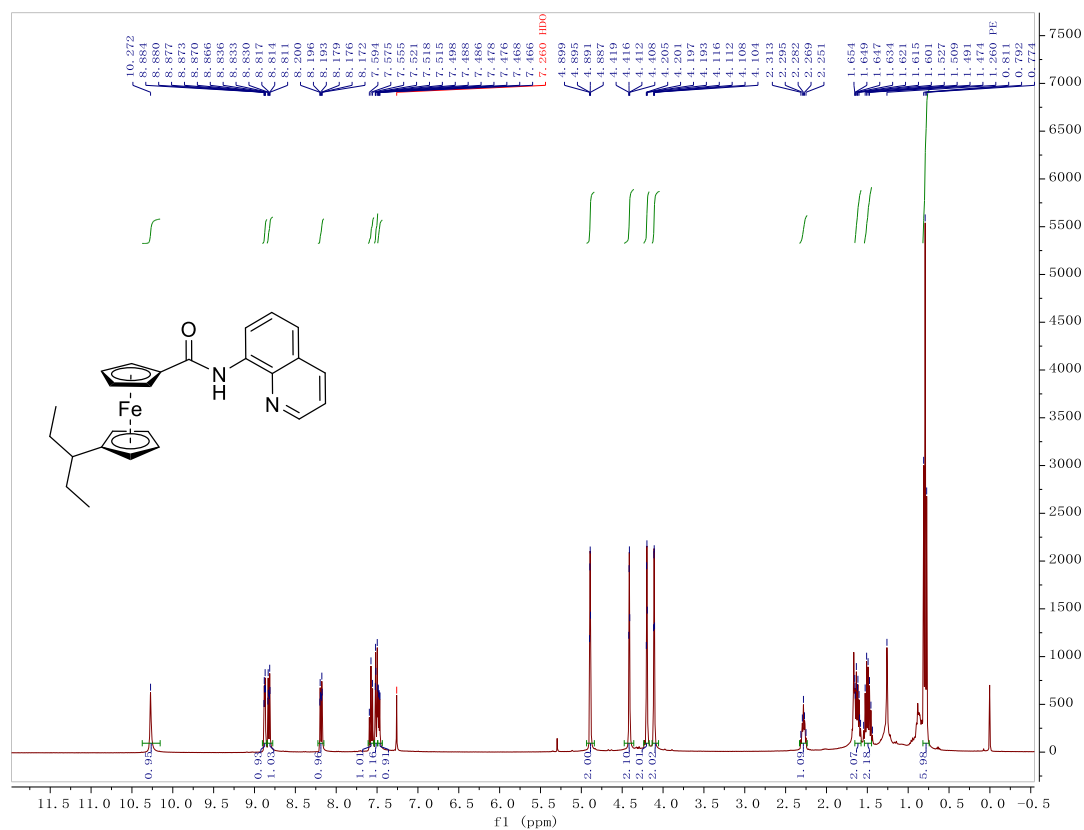

## 2e-<sup>1</sup>H NMR

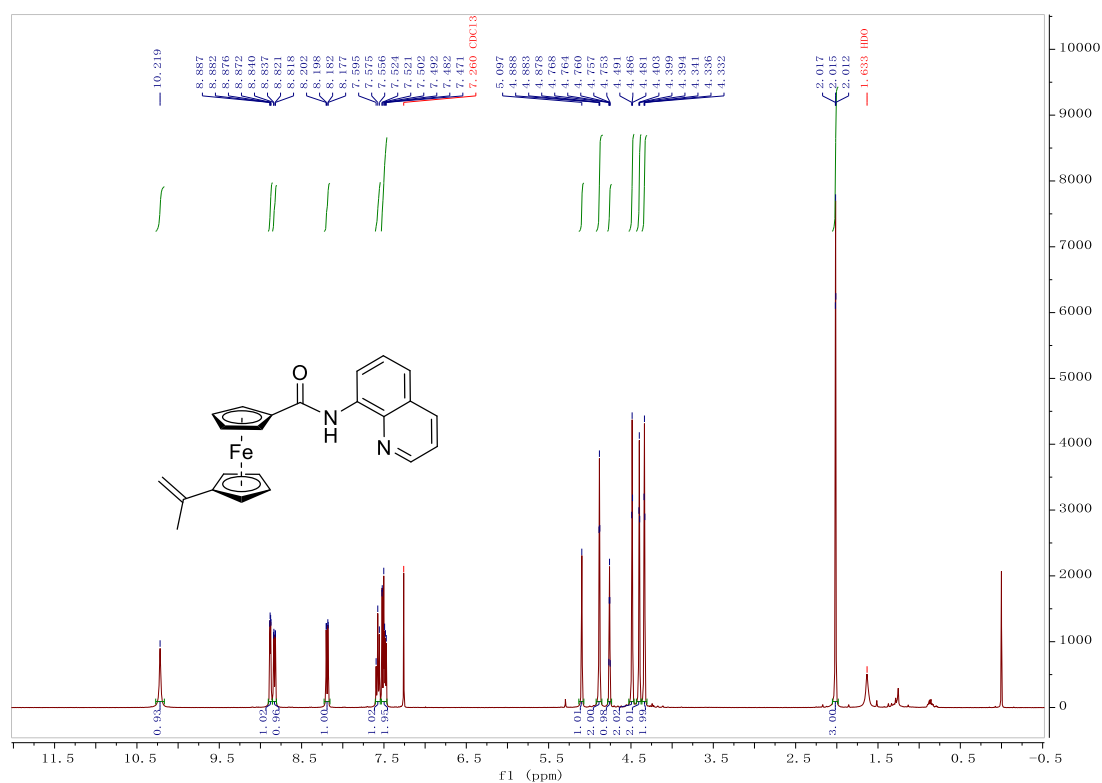

## 2e-<sup>13</sup>C NMR

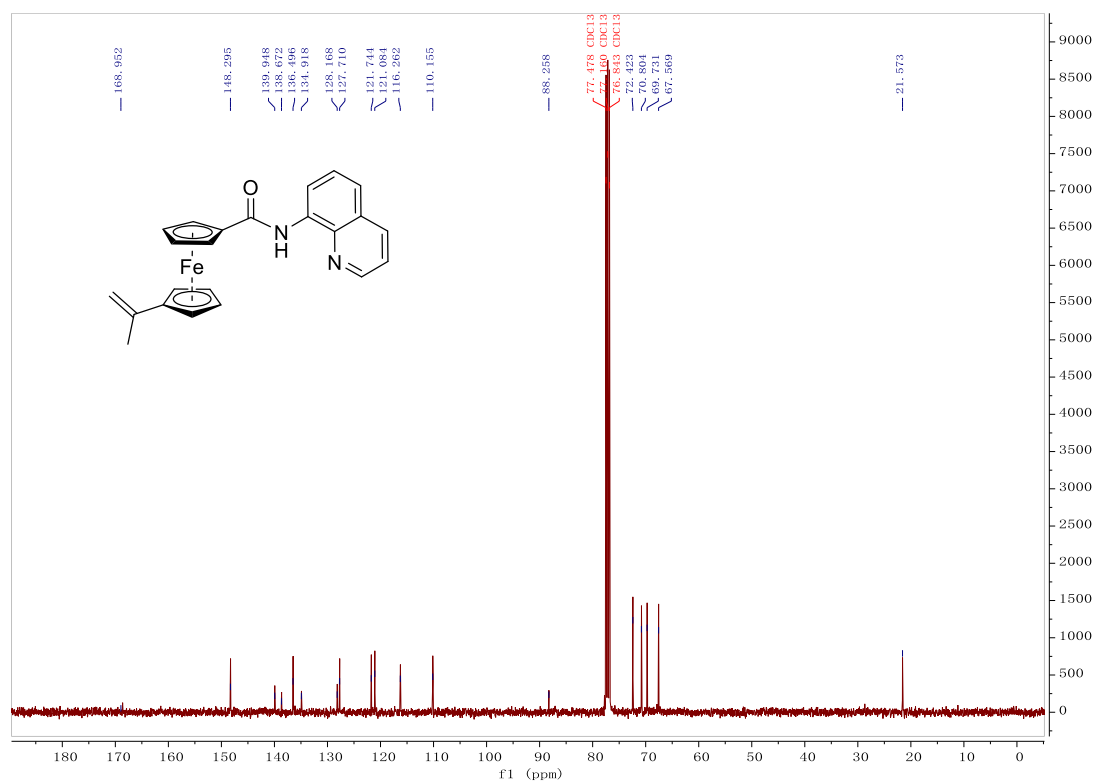

## 2f-<sup>1</sup>H NMR

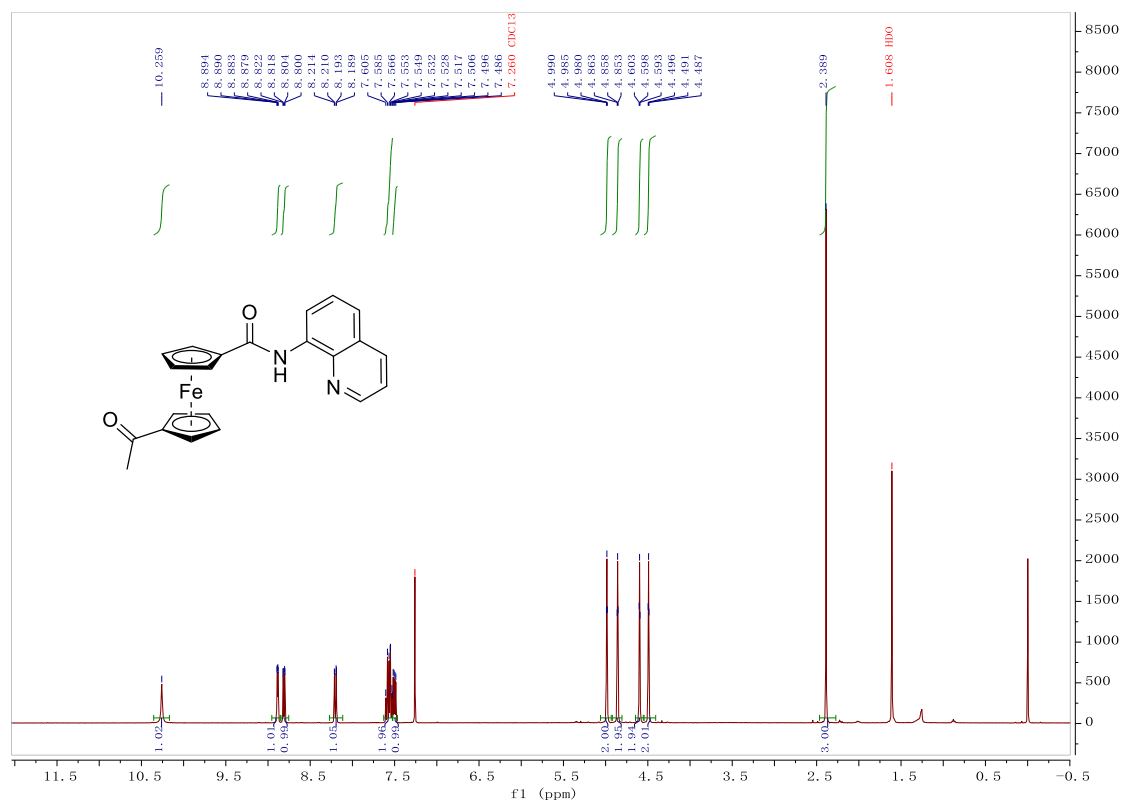

## 2f-<sup>13</sup>C NMR

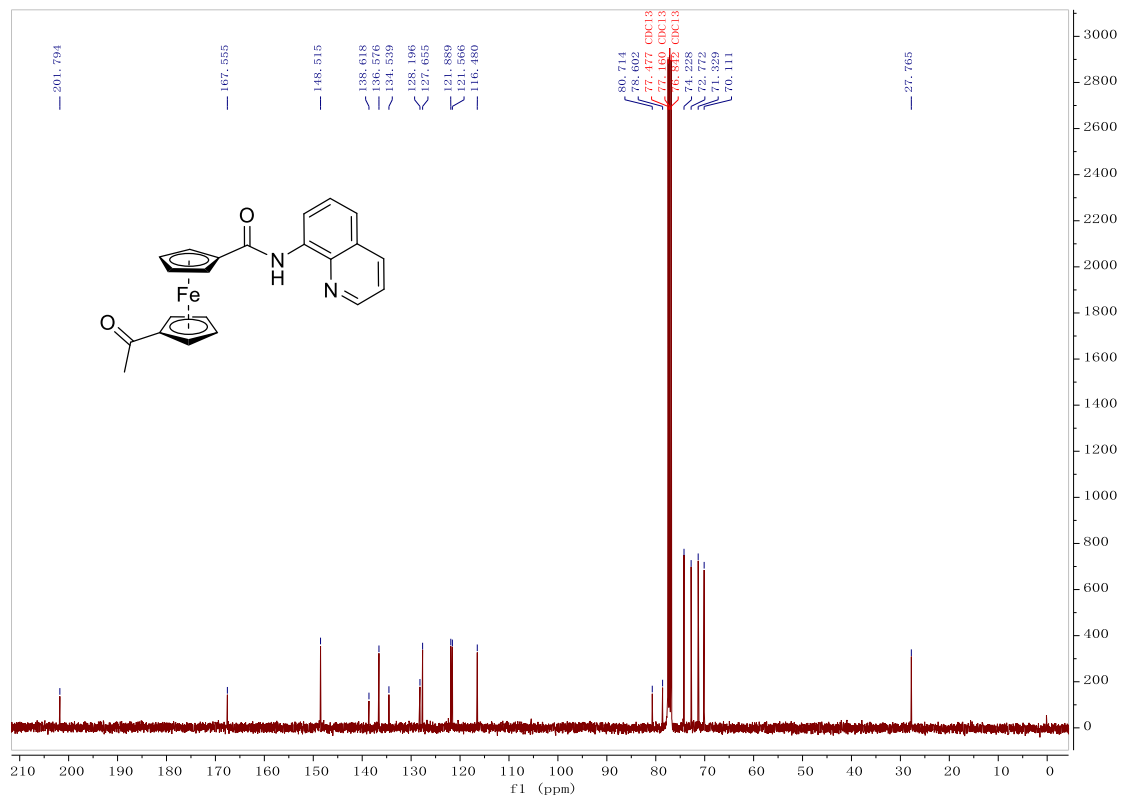

## 2g-<sup>1</sup>H NMR

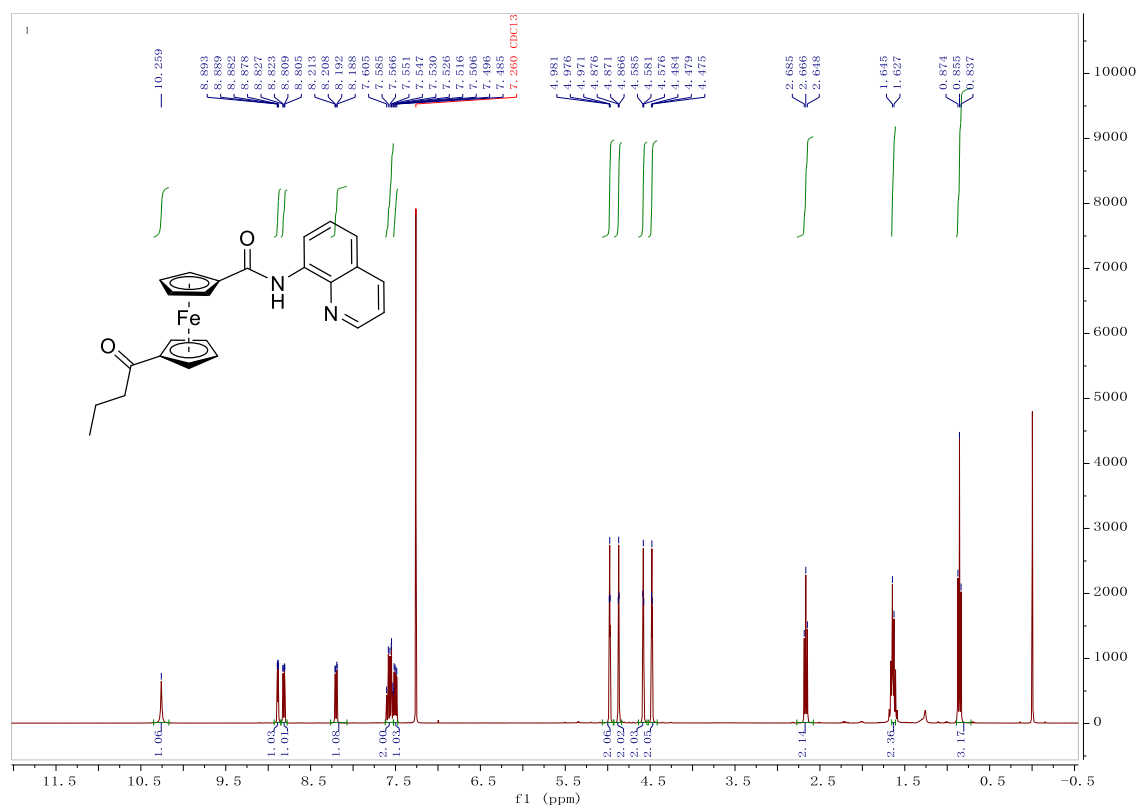

## 2g-<sup>13</sup>C NMR

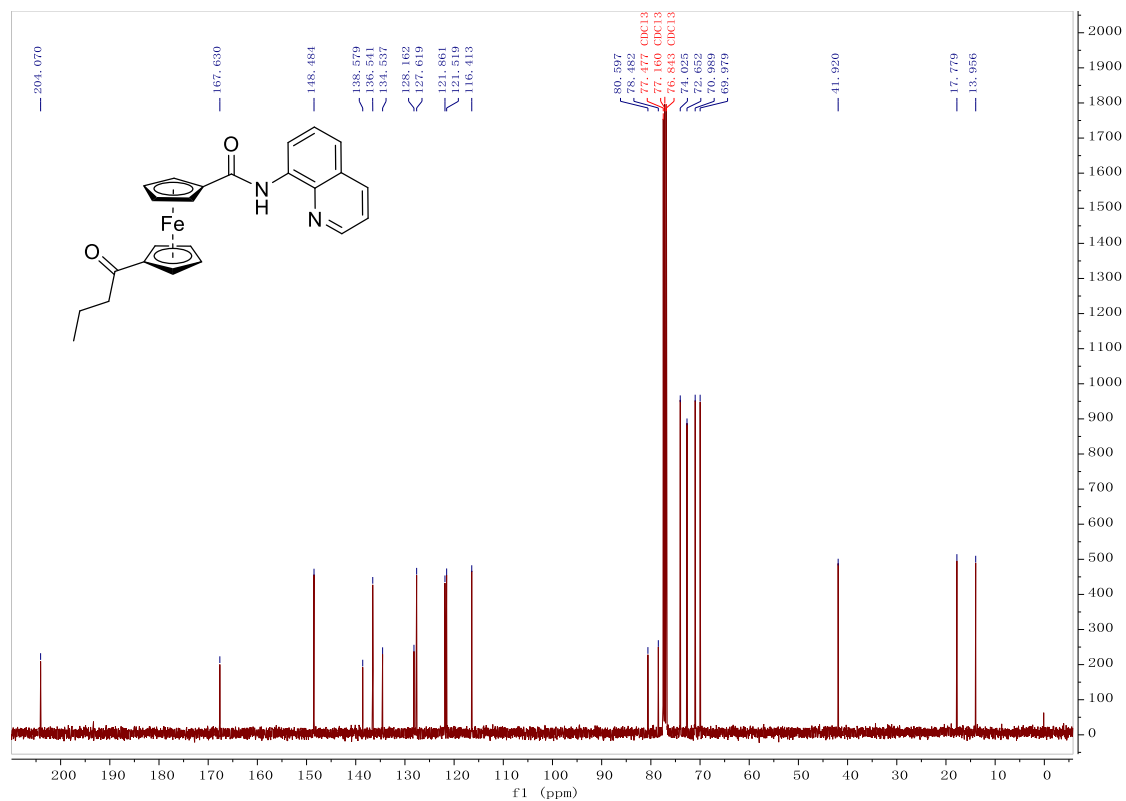

## 2h-<sup>1</sup>H NMR

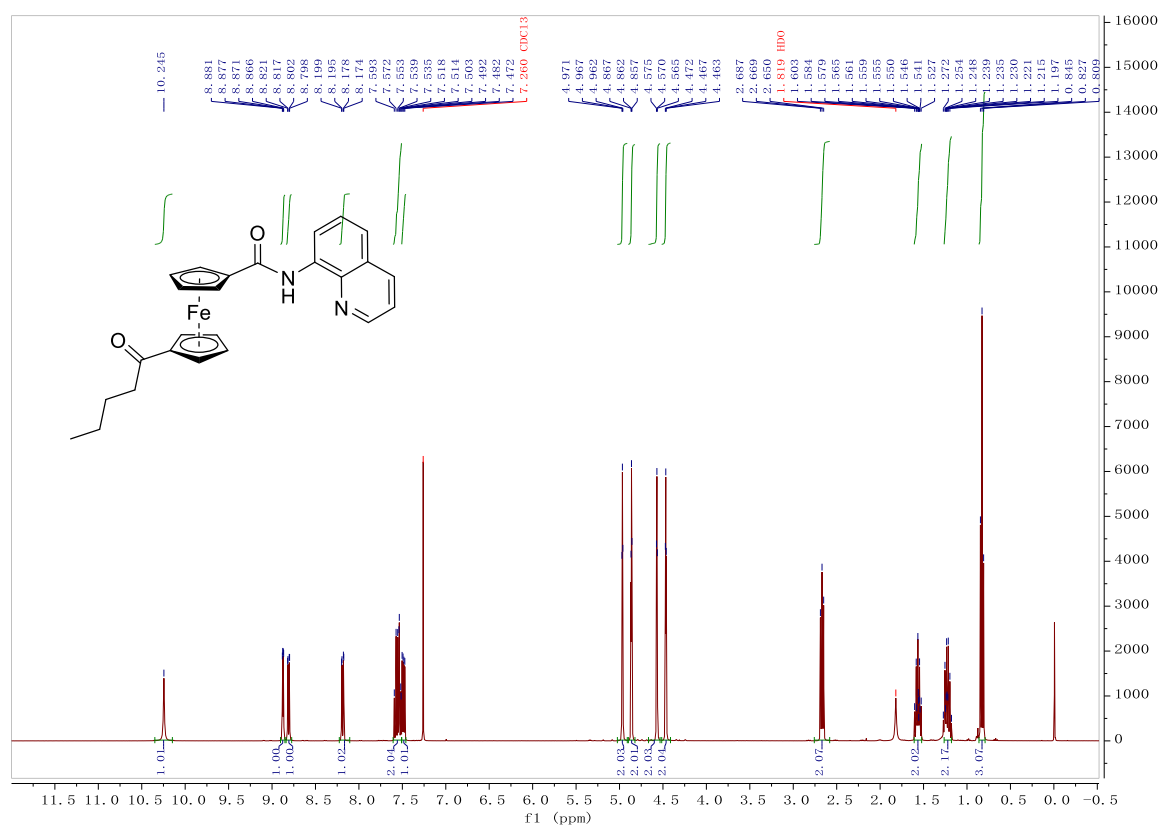

## 2h-<sup>13</sup>C NMR

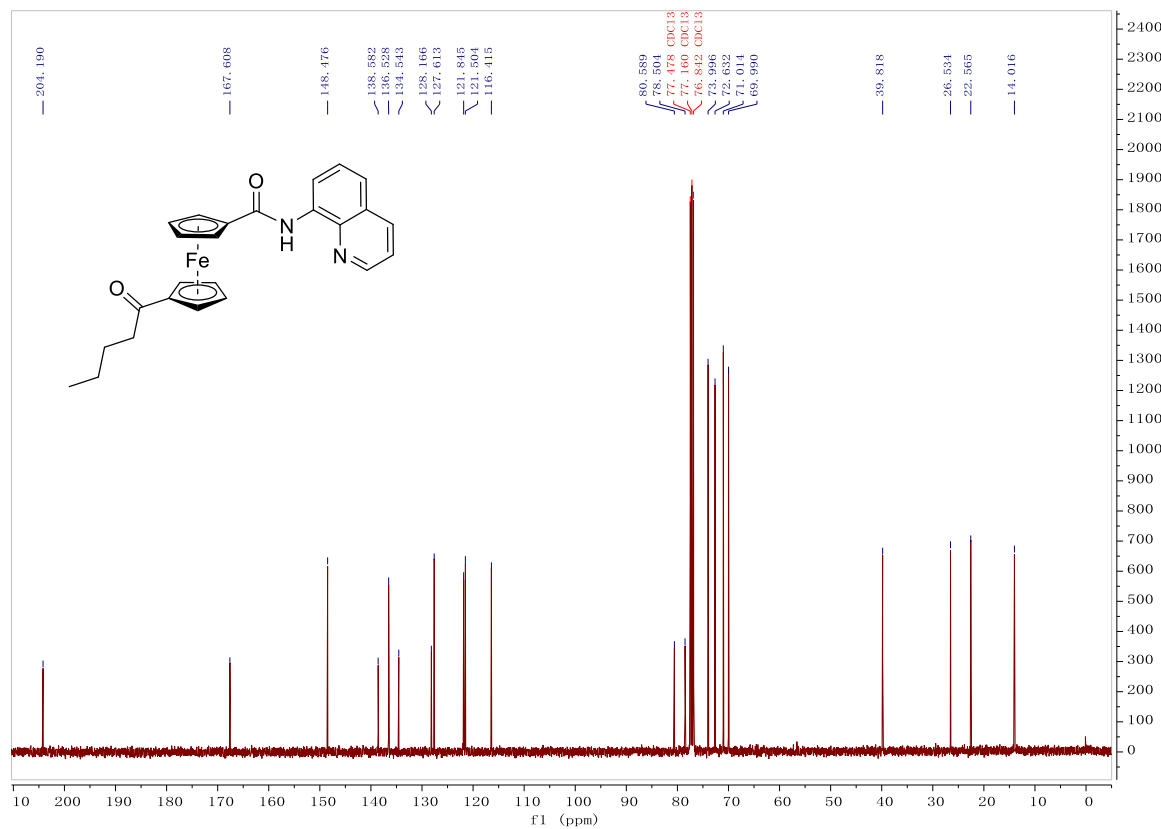

## 2i-<sup>1</sup>H NMR

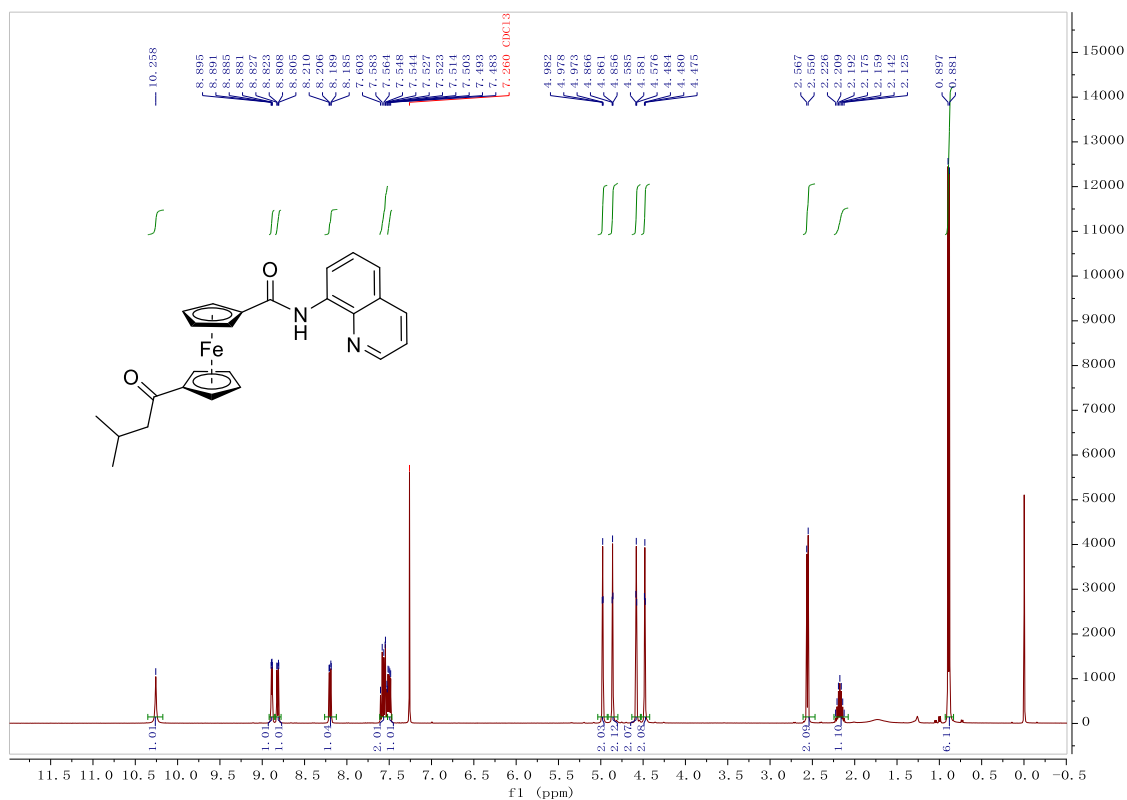

## 2i-<sup>13</sup>C NMR

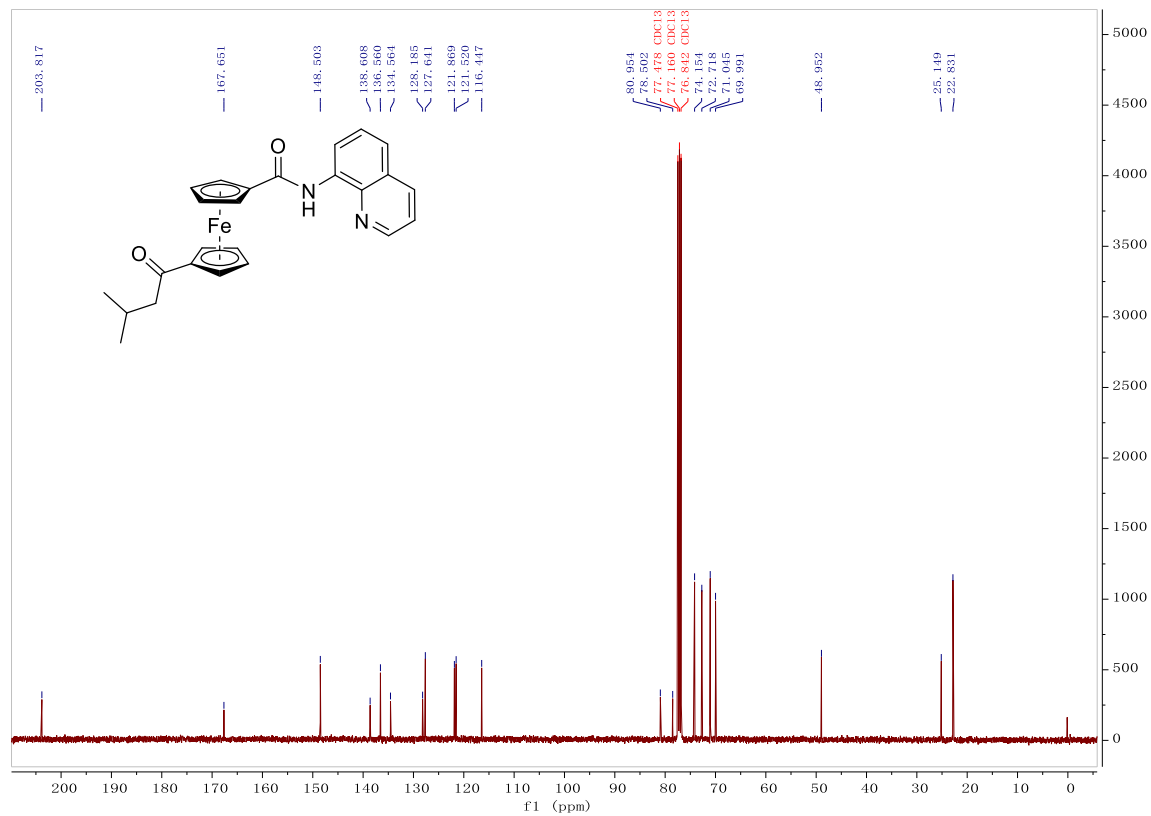



## 2j-<sup>1</sup>H NMR

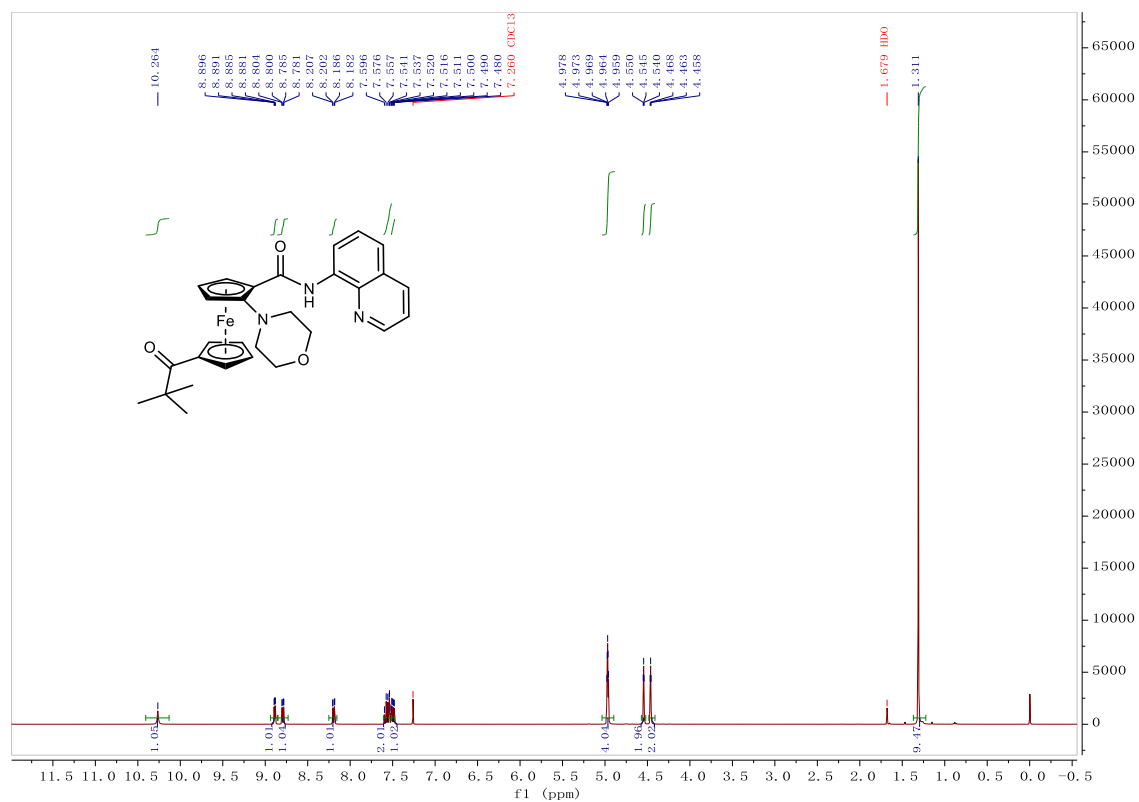

## 2j-<sup>13</sup>C NMR

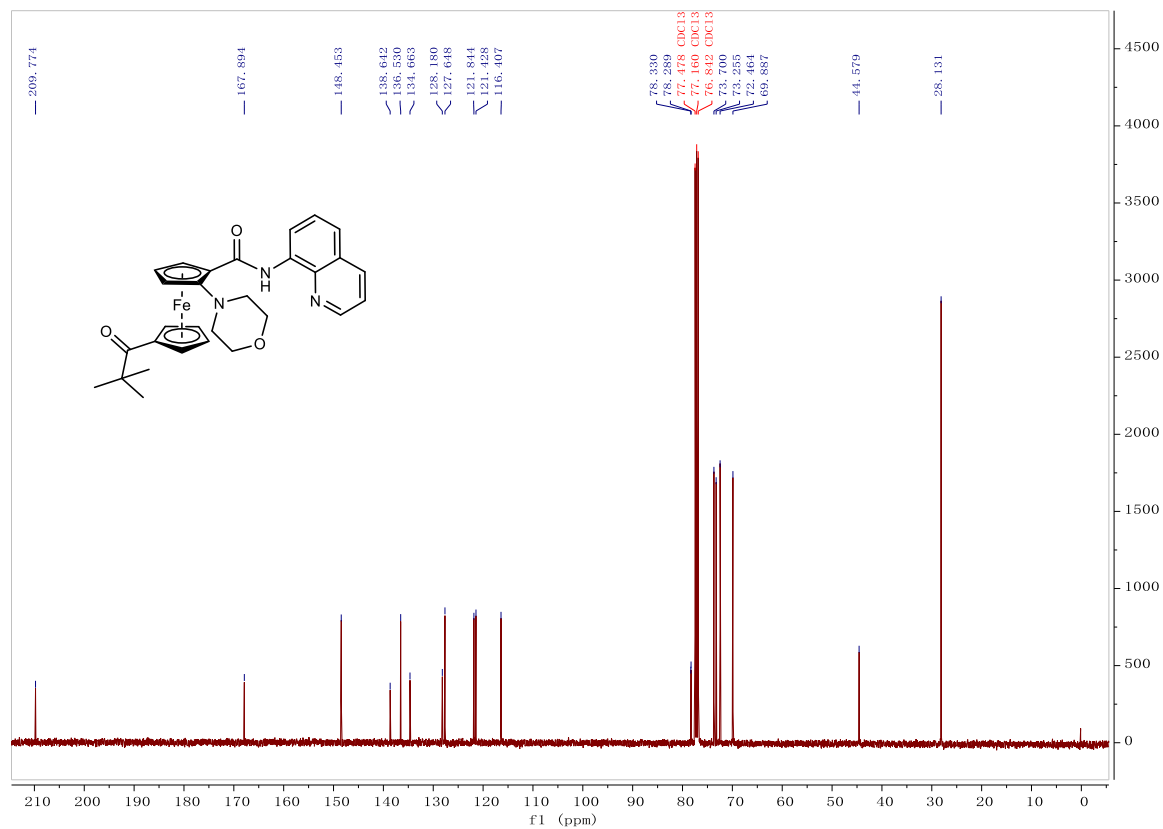

## 2k-<sup>1</sup>H NMR

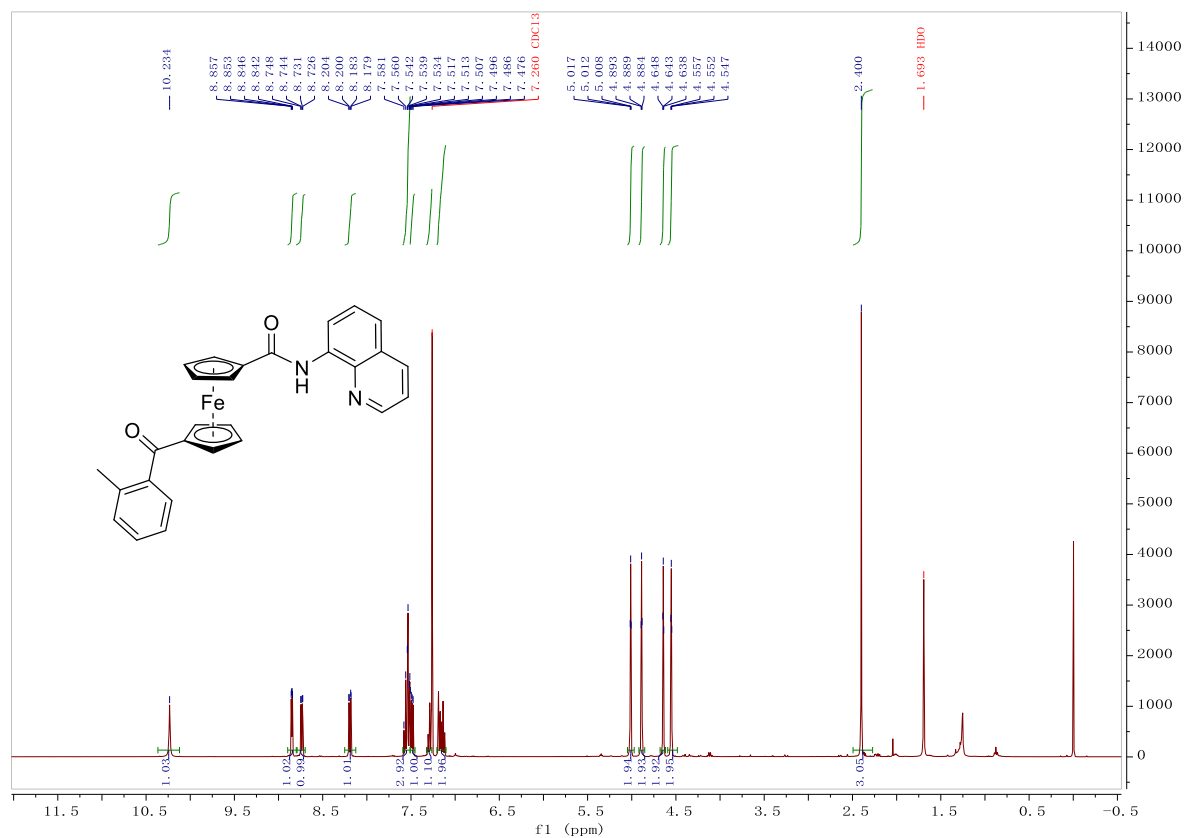

## 2k-<sup>13</sup>C NMR

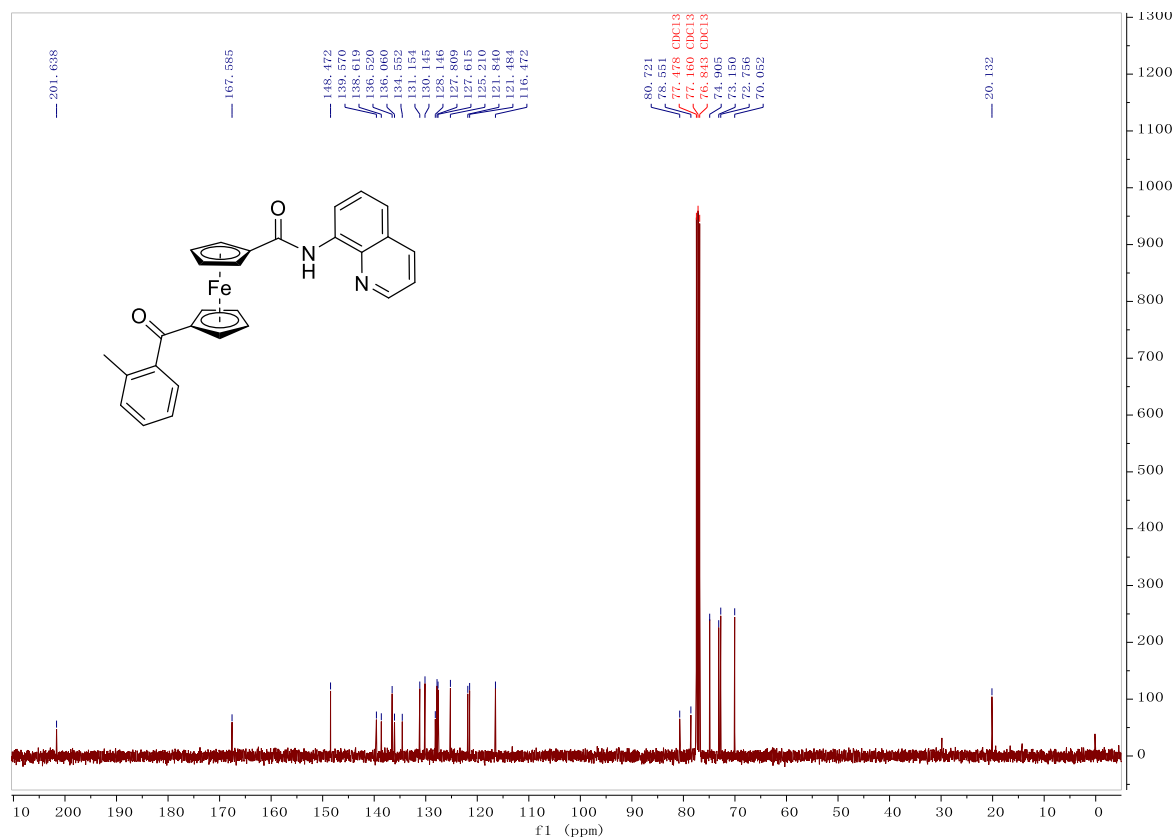

## 2l-<sup>1</sup>H NMR

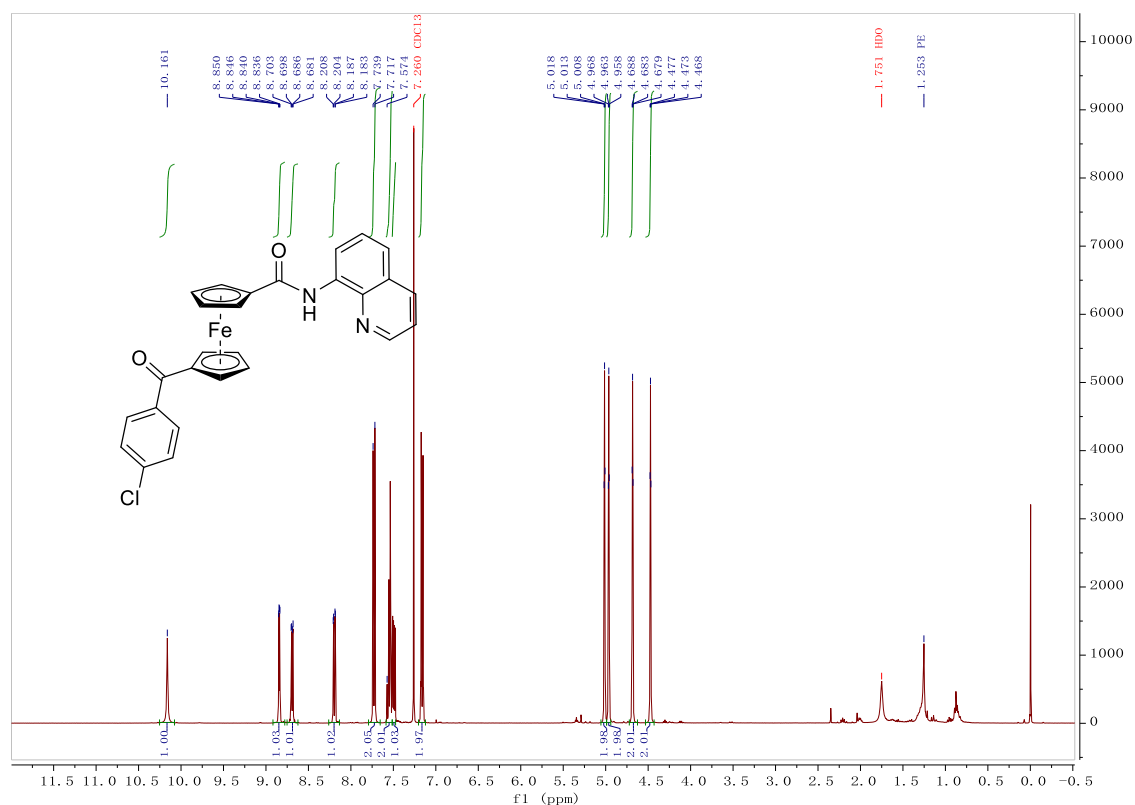

## 2l-<sup>13</sup>C NMR

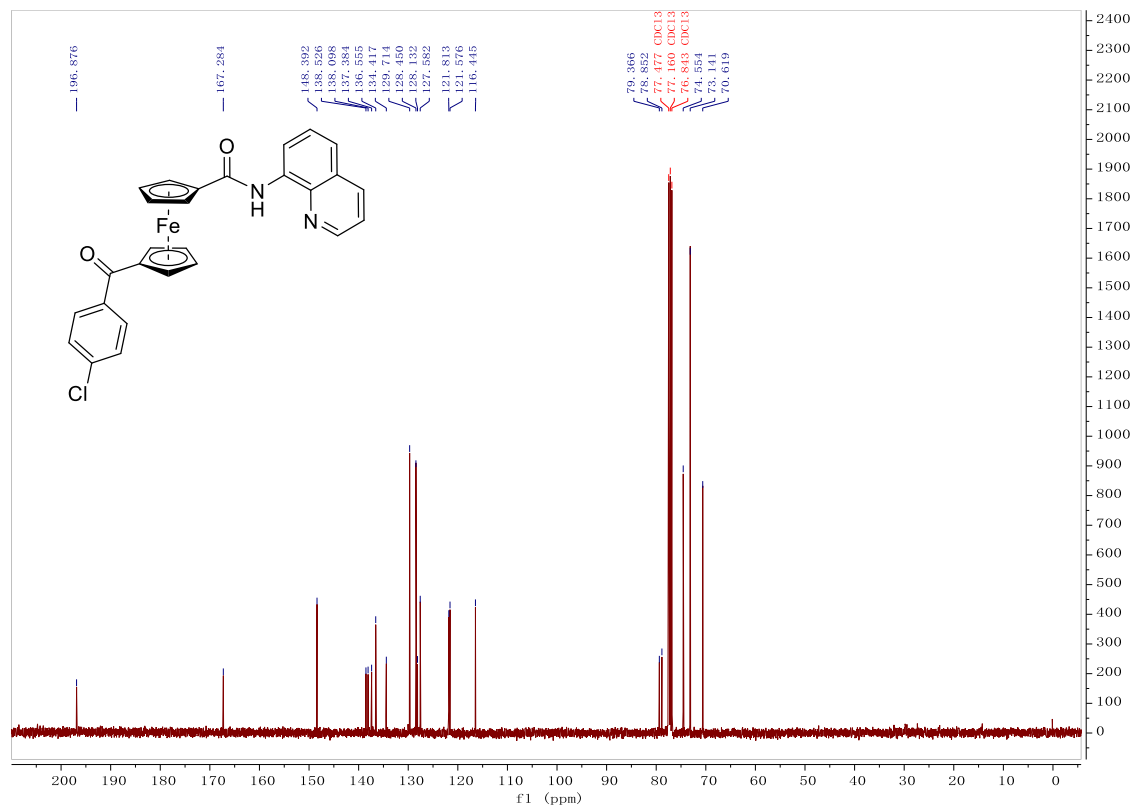

## 2m-<sup>1</sup>H NMR

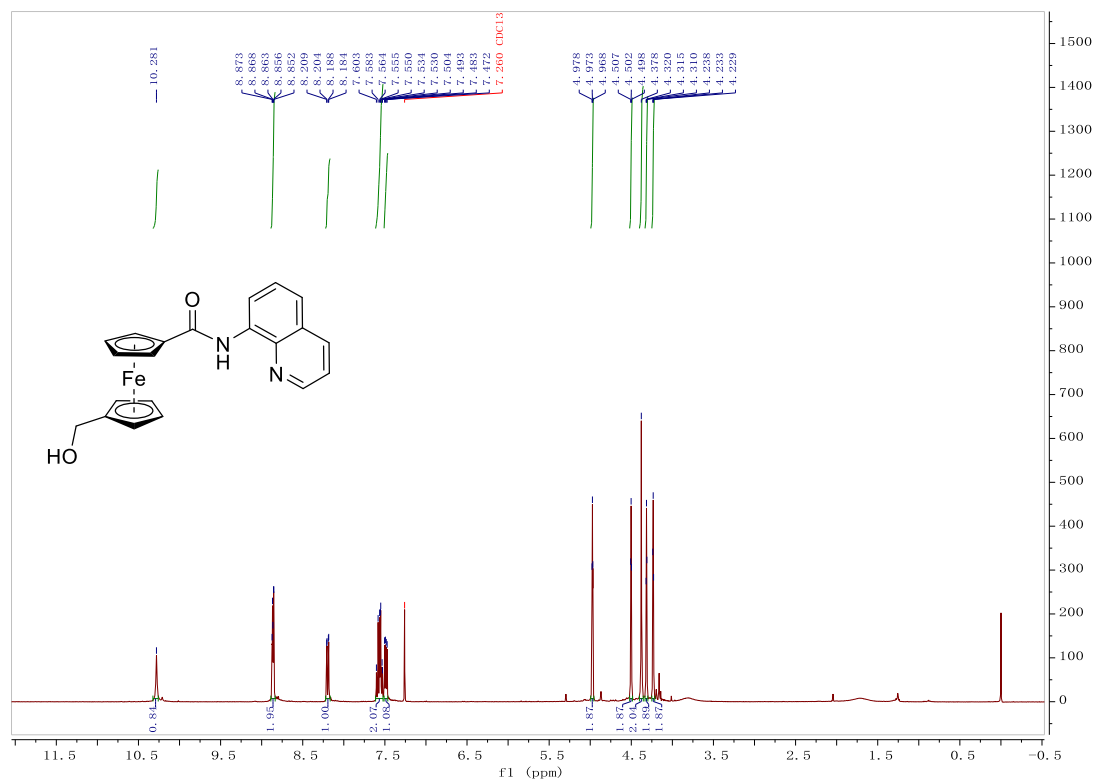

## 2m-<sup>13</sup>C NMR

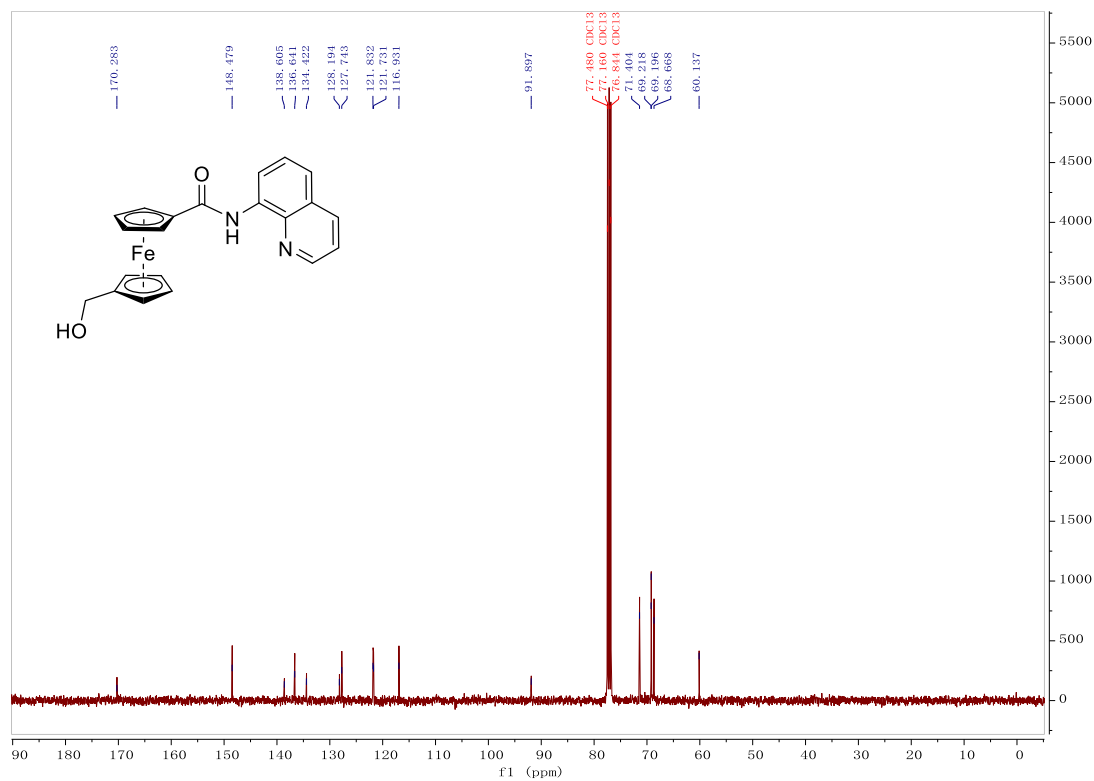

### 3b-<sup>1</sup>H NMR

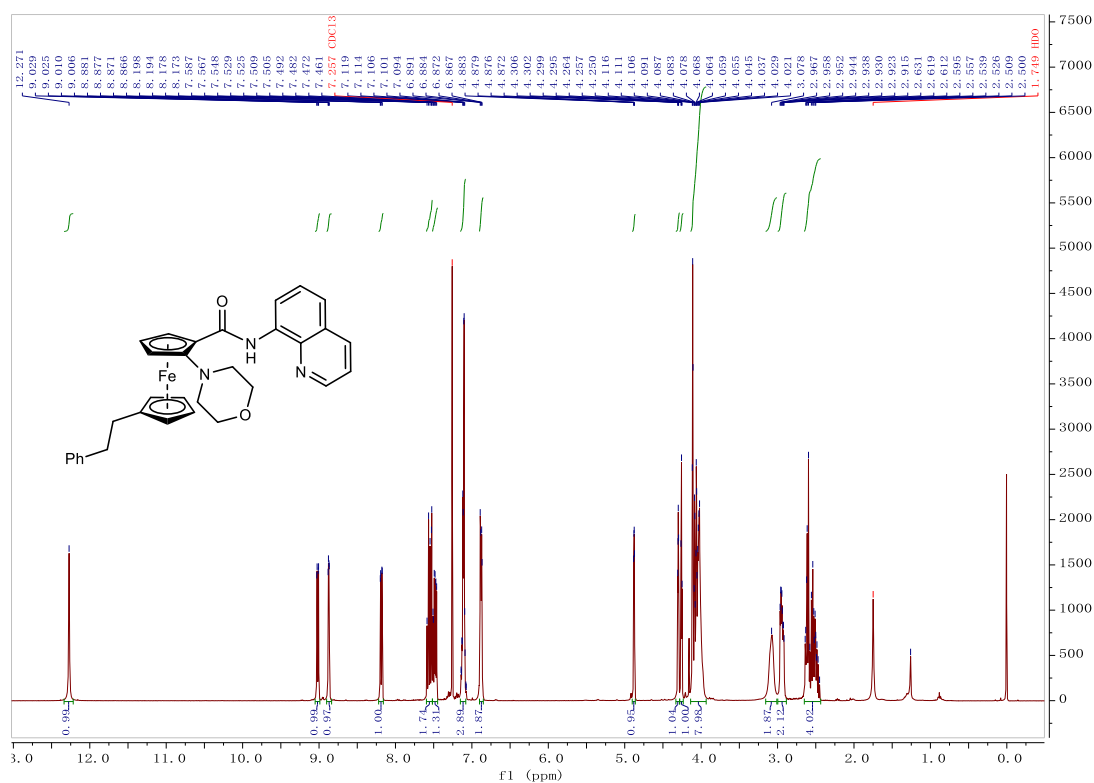

Chemical structure of compound 10 is shown in the top left. The <sup>13</sup>C NMR spectrum (CDCl<sub>3</sub>) shows peaks at the following chemical shifts (ppm): 169.556, 148.167, 139.622, 136.341, 128.413, 127.750, 121.632, 121.177, 117.565, 111.809, 98.688, 77.478 (CDCl<sub>3</sub>), 77.160 (CDCl<sub>3</sub>), 76.832 (CDCl<sub>3</sub>), 72.220, 70.985, 70.049, 68.981, 68.060, 67.465, 67.400, 66.646, 66.631, 55.498, 27.159, 23.872, 23.481, and 0.124.

### 3d-<sup>1</sup>H NMR

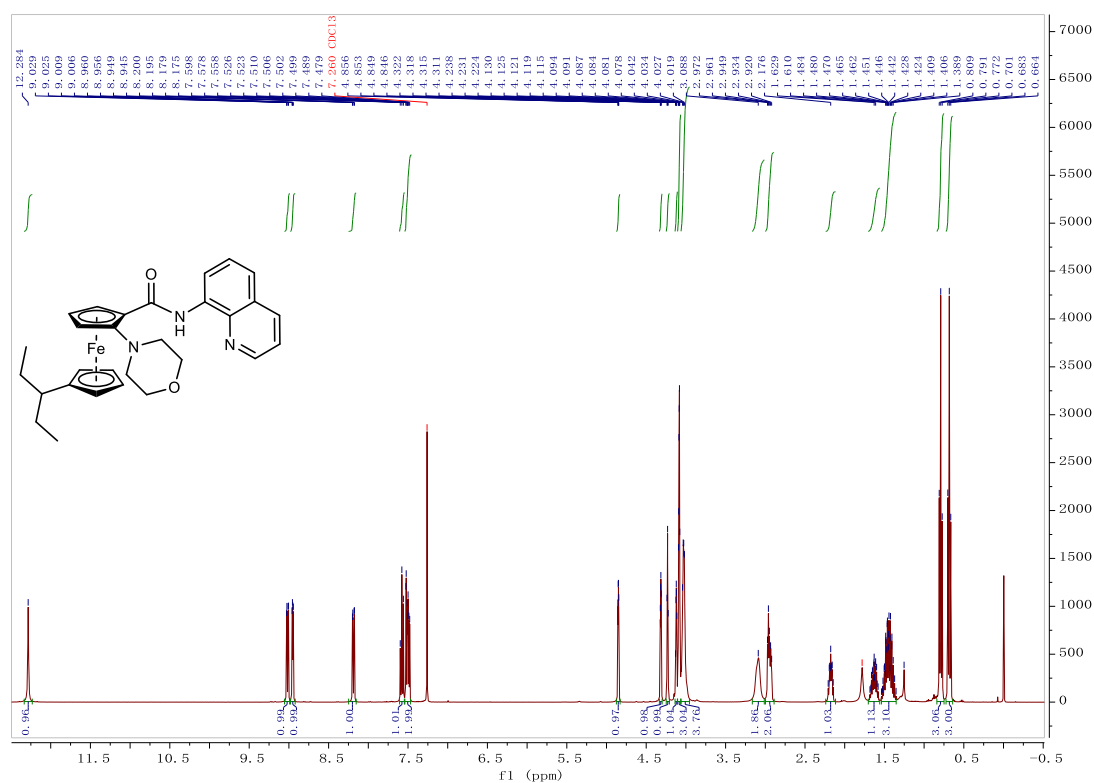

### 3d-<sup>13</sup>C NMR

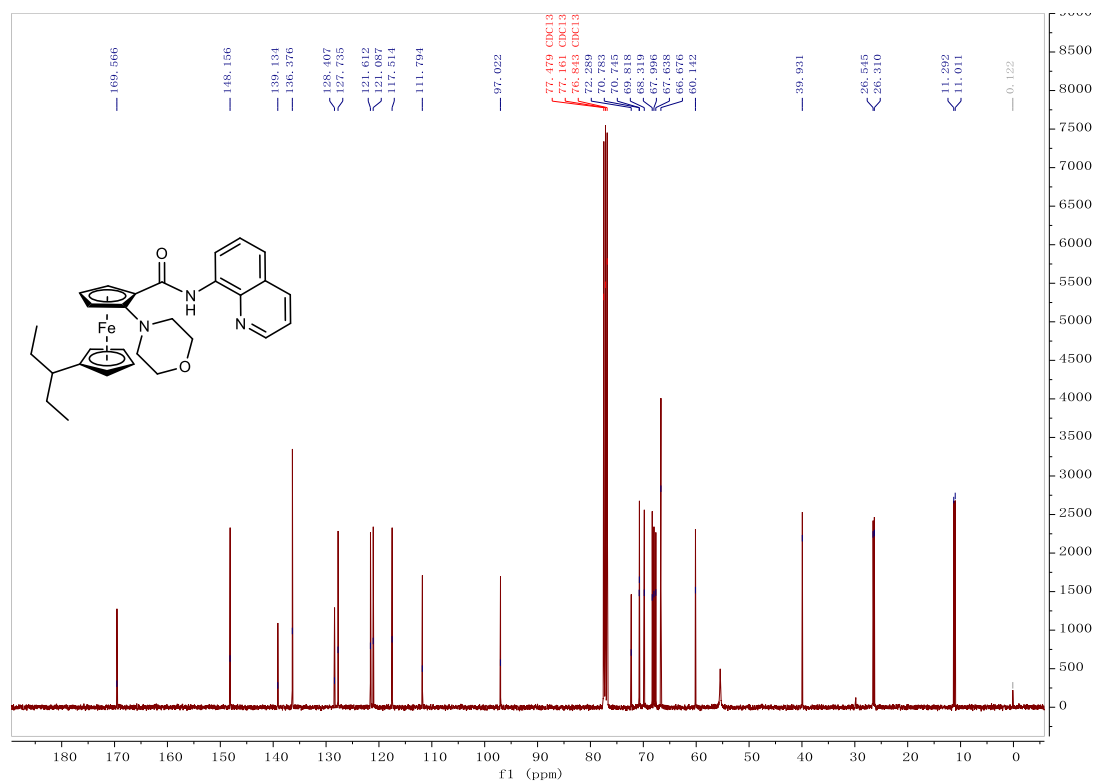

### 3e-<sup>1</sup>H NMR

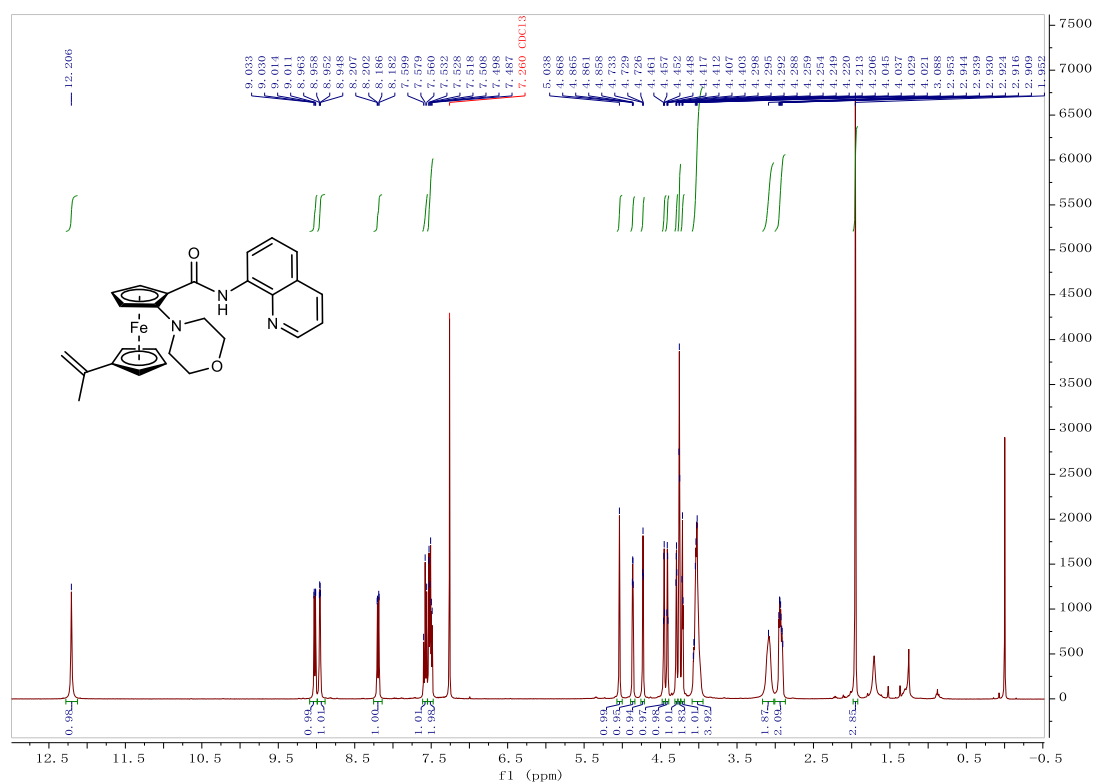

### 3e-<sup>13</sup>C NMR

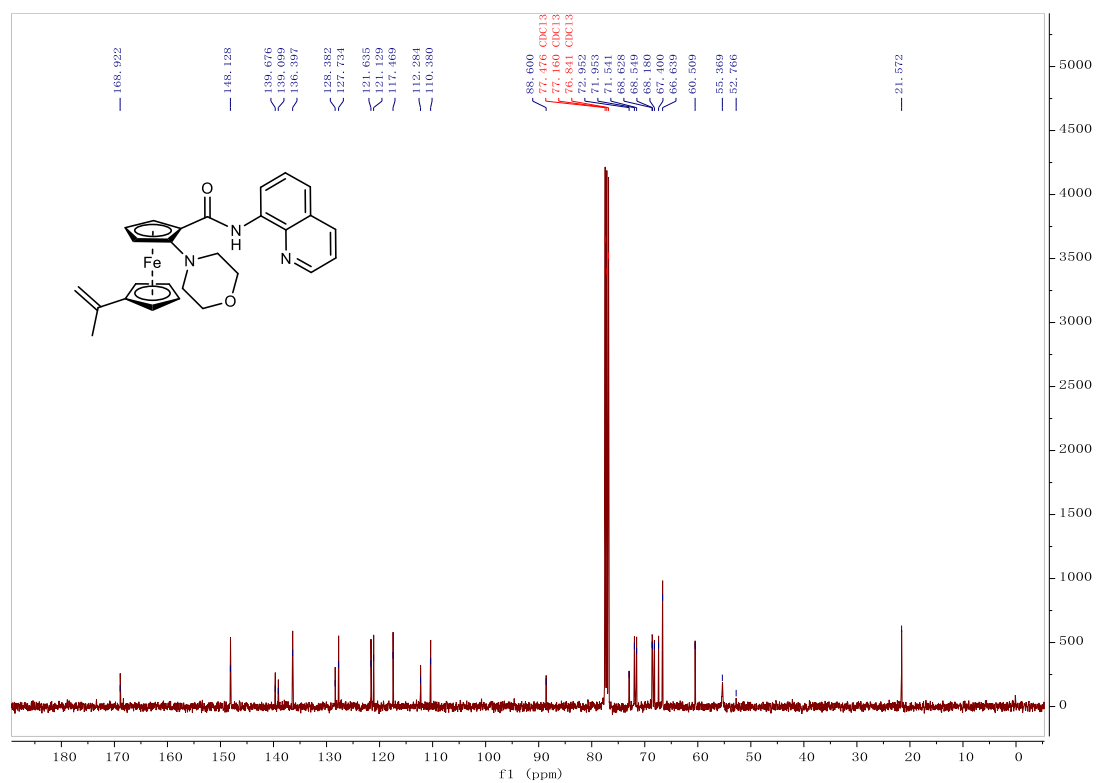



[illegible]

Chemical structure of compound 10 is shown. The structure is a ferrocene derivative with an acetyl group, a morpholine ring, and a quinoline-2-ylmethyl group.

<sup>13</sup>C NMR spectrum (CDCl<sub>3</sub>) of compound 10. The x-axis represents the chemical shift in ppm (f1), ranging from 0 to 240. The y-axis represents the intensity of the signal. The spectrum shows a large peak at 77.478 ppm (CDCl<sub>3</sub> solvent), and several other peaks in the aromatic and aliphatic regions.

Chemical shift values (ppm) labeled on the spectrum:

- 201.838
- 168.094
- 148.363
- 138.981
- 136.485
- 135.850
- 128.407
- 127.685
- 121.820
- 121.638
- 117.646
- 113.463
- 80.834
- 77.478 CDCl<sub>3</sub>
- 77.073
- 76.843 CDCl<sub>3</sub>
- 75.497
- 73.048
- 72.725
- 71.359
- 68.865
- 67.922
- 66.539
- 60.962
- 55.117
- 27.870
- 0.116

### 3g-<sup>1</sup>H NMR

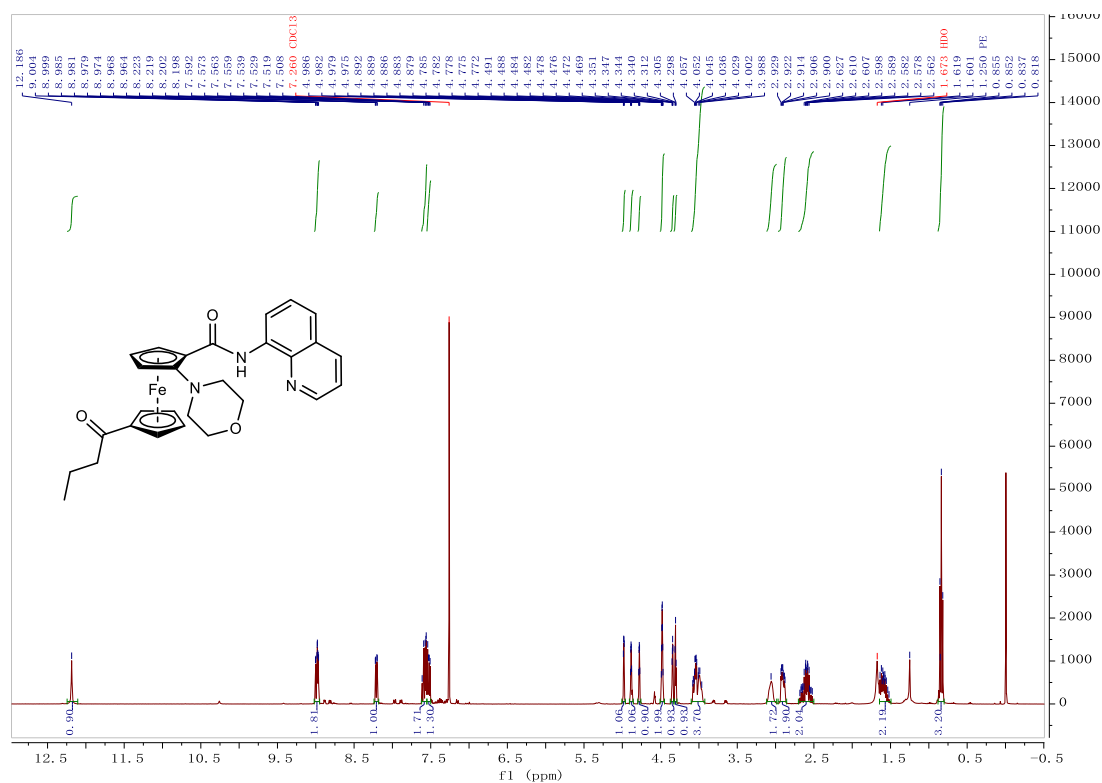

Chemical structure of compound 10 is shown as an inset. The structure is a ferrocene derivative with a 4-oxopentyl group on one cyclopentadienyl ring and a 1-(quinolin-2-yl)pyrrolidine-2-carboxamide group on the other.

<sup>1</sup>H NMR spectrum (CDCl<sub>3</sub>) of compound 10. The x-axis represents the chemical shift in ppm (f1), ranging from -0.5 to 12.5. The y-axis represents intensity, ranging from 0 to 34000. The spectrum shows several peaks, with integration values provided below the baseline. A list of chemical shifts (delta) is provided on the right side of the spectrum.

Chemical shifts (delta) listed on the right:

- 12.182
- 8.990
- 8.985
- 8.980
- 8.977
- 8.973
- 8.969
- 8.962
- 8.220
- 8.216
- 8.200
- 8.196
- 7.582
- 7.570
- 7.560
- 7.556
- 7.536
- 7.528
- 7.505
- 7.260 CXC13
- 4.984
- 4.980
- 4.977
- 4.973
- 4.889
- 4.885
- 4.882
- 4.879
- 4.875
- 4.862
- 4.784
- 4.780
- 4.777
- 4.774
- 4.770
- 4.686
- 4.485
- 4.482
- 4.478
- 4.475
- 4.471
- 4.467
- 4.464
- 4.346
- 4.342
- 4.339
- 4.335
- 4.328
- 4.299
- 4.292
- 4.052
- 4.045
- 4.035
- 4.029
- 4.007
- 4.000
- 3.990
- 3.982
- 3.972
- 2.919
- 2.911
- 2.903
- 2.898
- 2.892
- 2.882
- 2.872
- 2.623
- 2.618
- 2.602
- 2.587
- 2.582
- 2.572
- 1.719 HDO
- 1.546
- 1.518
- 1.250 PE
- 0.860
- 0.822
- 0.823

Integration values (from left to right):

- 0.98
- 1.92
- 1.00
- 1.73
- 1.27
- 0.97
- 0.96
- 0.97
- 0.97
- 1.00
- 3.96
- 1.76
- 2.03
- 2.05
- 2.39
- 3.08

Chemical structure of compound 10 is shown in the top left. The  $^1\text{H}$  NMR spectrum (CDCl<sub>3</sub>) is displayed below, with peaks labeled by their chemical shift (ppm) and integration values.

| Chemical Shift (ppm) | Integration |
|----------------------|-------------|
| 8.09                 | 0.02        |
| 7.77                 | 0.02        |
| 7.76                 | 0.02        |
| 7.58                 | 0.02        |
| 7.54                 | 0.02        |
| 7.48                 | 0.02        |
| 7.45                 | 0.02        |
| 7.35                 | 0.02        |
| 7.22                 | 0.02        |
| 7.15                 | 0.02        |
| 7.07                 | 0.02        |
| 6.87                 | 0.02        |
| 6.78                 | 0.02        |
| 6.67                 | 0.02        |
| 6.57                 | 0.02        |
| 6.59                 | 0.02        |
| 5.55                 | 0.02        |
| 3.91                 | 0.02        |
| 2.65                 | 0.02        |
| 2.53                 | 0.02        |
| 1.41                 | 0.02        |
| 0.13                 | 0.02        |

### 3i-<sup>1</sup>H NMR

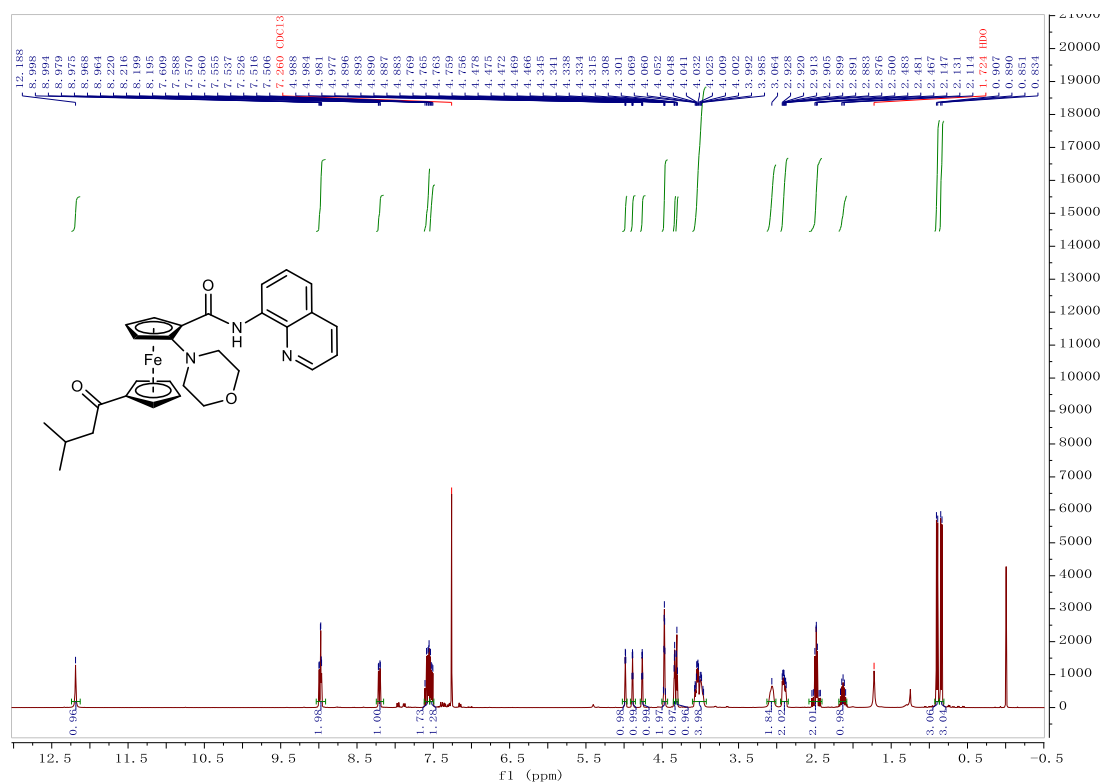

### 3i-<sup>13</sup>C NMR

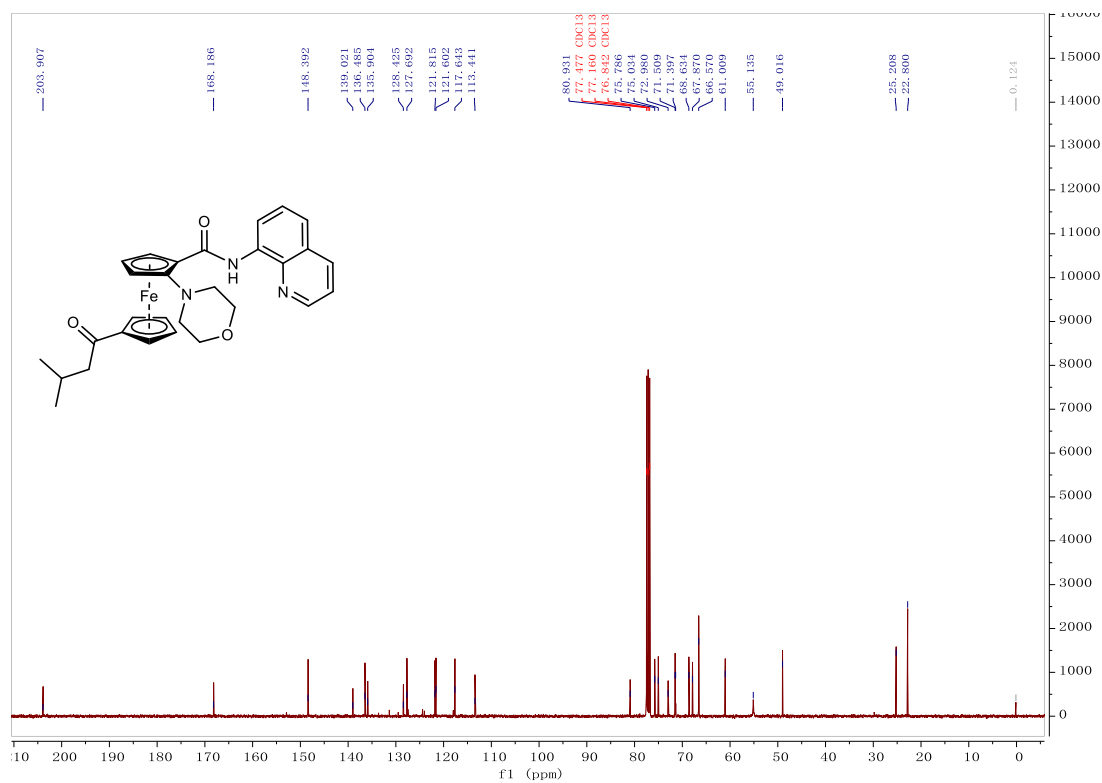

### 3j-<sup>1</sup>H NMR

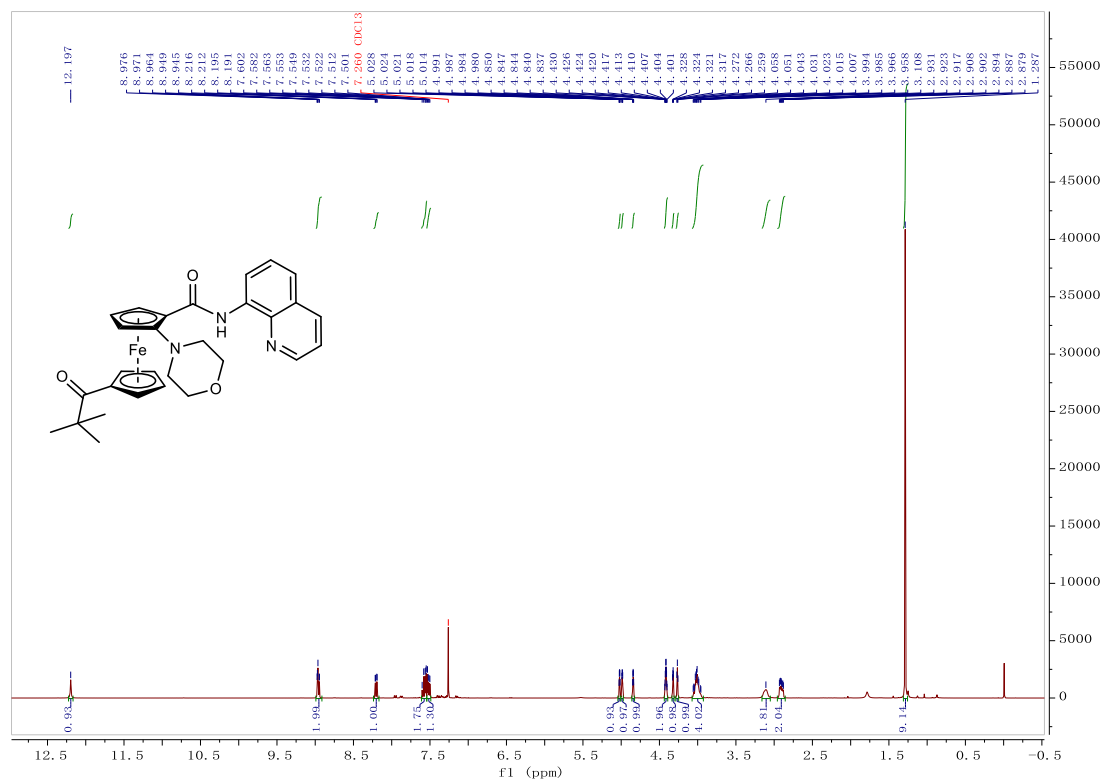

[illegible]

Chemical structure of compound **1** is shown. The <sup>1</sup>H NMR spectrum (top) and <sup>13</sup>C NMR spectrum (bottom) are displayed, both recorded in CDCl<sub>3</sub>. The x-axis represents the chemical shift in ppm, ranging from 0 to 1200. The y-axis represents intensity. The <sup>1</sup>H NMR spectrum shows peaks at 8.0, 7.7, 7.6, 7.3, 7.2, 6.8, 6.6, 6.1, 5.5, 2.0, and 0.1 ppm. The <sup>13</sup>C NMR spectrum shows peaks at 201.4, 168.1, 148.4, 139.4, 138.4, 136.4, 136.1, 135.8, 131.3, 130.3, 129.3, 127.8, 127.6, 125.2, 121.8, 121.6, 117.4, 113.7, 80.3, 77.4, 77.2, 77.0, 76.8, 73.4, 73.1, 72.7, 72.5, 68.7, 68.5, 61.5, 61.3, 55.7, 20.1, and 0.1 ppm.

**Chemical Structure of 10:** Clc1ccc(cc1)C(=O)c2c3c(ccc2Fe3)OCCNc4cccnc4

**<sup>1</sup>H NMR Spectrum (CDCl<sub>3</sub>):**

- Chemical Shifts (ppm):** 12.112, 8.941, 8.937, 8.931, 8.927, 8.922, 8.917, 8.898, 8.886, 8.881, 8.821, 8.217, 8.212, 8.196, 7.738, 7.717, 7.597, 7.575, 7.558, 7.553, 7.535, 7.524, 7.514, 7.504, 7.292, 7.271, 7.260, 6.5084, 6.5081, 6.5077, 6.5074, 6.4991, 4.987, 4.985, 4.982, 4.969, 4.901, 4.897, 4.894, 4.890, 4.887, 4.882, 4.872, 4.599, 4.596, 4.592, 4.589, 4.585, 4.567, 4.564, 4.560, 4.557, 4.553, 4.551, 4.378, 4.311, 4.308, 4.301, 4.295, 4.293, 4.291, 4.012, 4.005, 3.992, 3.984, 3.981, 3.977, 3.969, 3.956, 3.952, 3.933, 3.925, 3.036, 3.009, 2.991, 2.981, 2.895, 2.886, 2.881, 2.872, 2.866, 2.861, 1.681, 1.000.
- Integration Values:** 0.98, 1.02, 0.97, 1.00, 2.00, 1.90, 1.29, 2.03, 0.97, 0.97, 1.03, 0.99, 1.99, 4.01, 1.88, 2.00.

Chemical structure of compound 10 is shown. The structure is a ferrocene derivative with a 4-chlorobenzoyl group on one cyclopentadienyl ring and a 2-(quinolin-2-yl)carbamoyl group on the other.

<sup>13</sup>C NMR spectrum (CDCl<sub>3</sub>) of compound 10. The x-axis represents the chemical shift in ppm (f1), ranging from 0 to 200. The y-axis represents intensity. The spectrum shows several peaks, with the most prominent ones around 130-140 ppm and 75-80 ppm.

Chemical shifts (ppm) listed on the right side of the spectrum:

- 196.826
- 167.814
- 148.328
- 138.900
- 138.219
- 137.458
- 136.500
- 135.722
- 135.522
- 128.552
- 128.393
- 127.659
- 121.778
- 119.526
- 117.672
- 113.753
- 79.318
- 77.478 CDCl<sub>3</sub>
- 77.160 CDCl<sub>3</sub>
- 76.842 CDCl<sub>3</sub>
- 76.273
- 75.671
- 73.512
- 73.410
- 72.544
- 69.032
- 68.654
- 66.535
- 61.595
- 55.044
- 0.134

### 3m-<sup>1</sup>H NMR

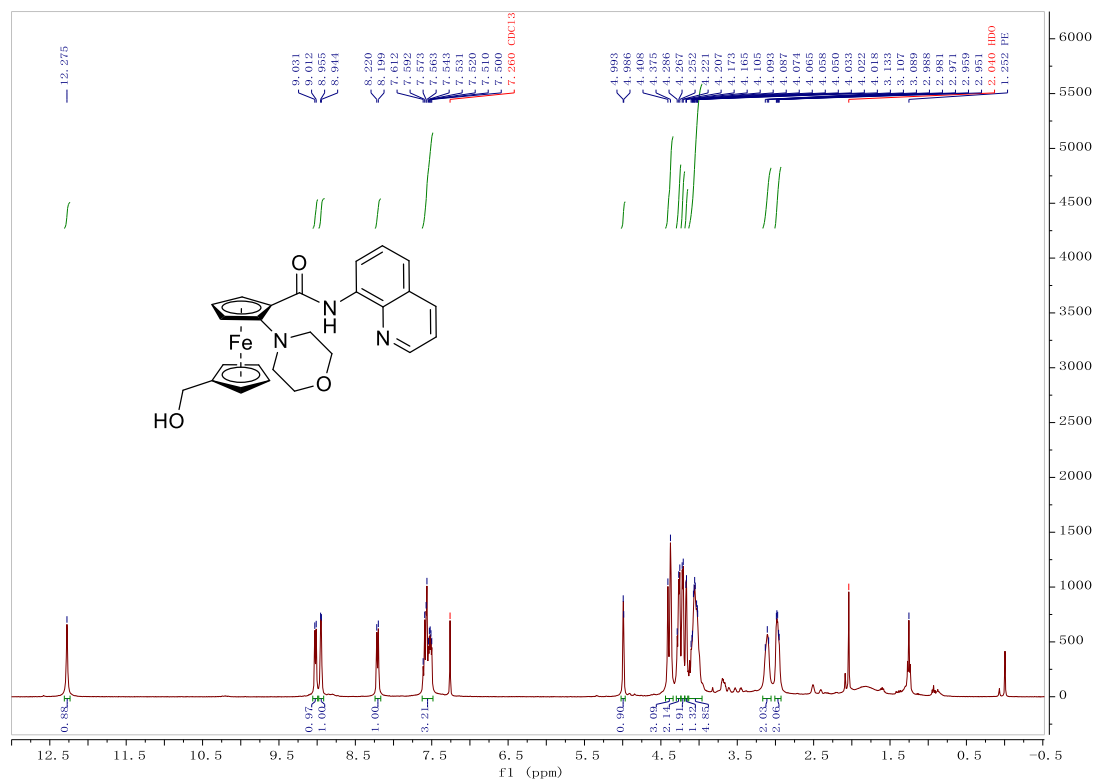

### 3m-<sup>13</sup>C NMR

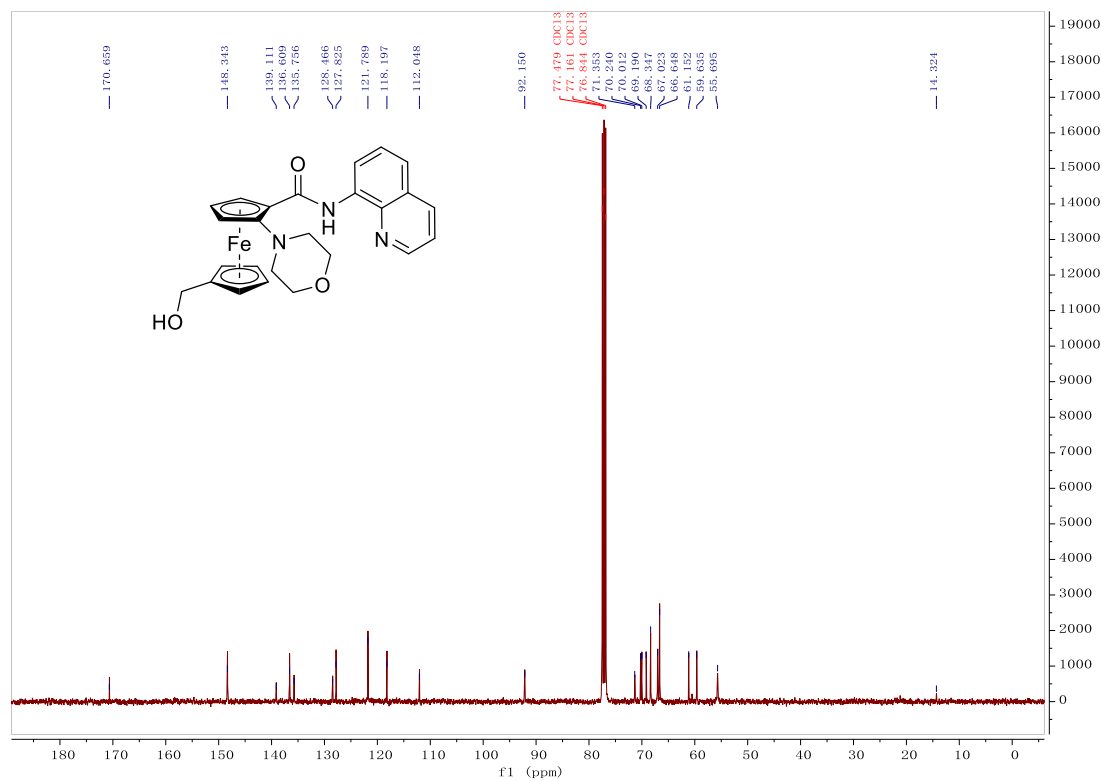



# **4a-<sup>1</sup>H NMR**

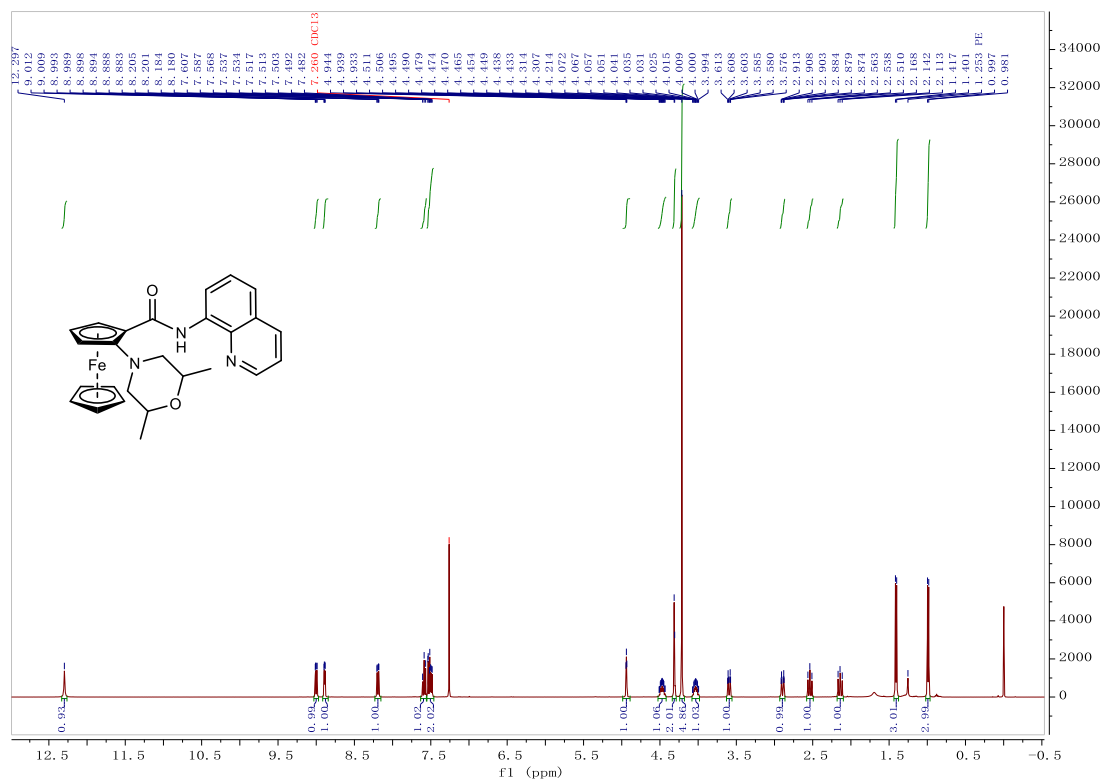

# **4a-<sup>13</sup>C NMR**

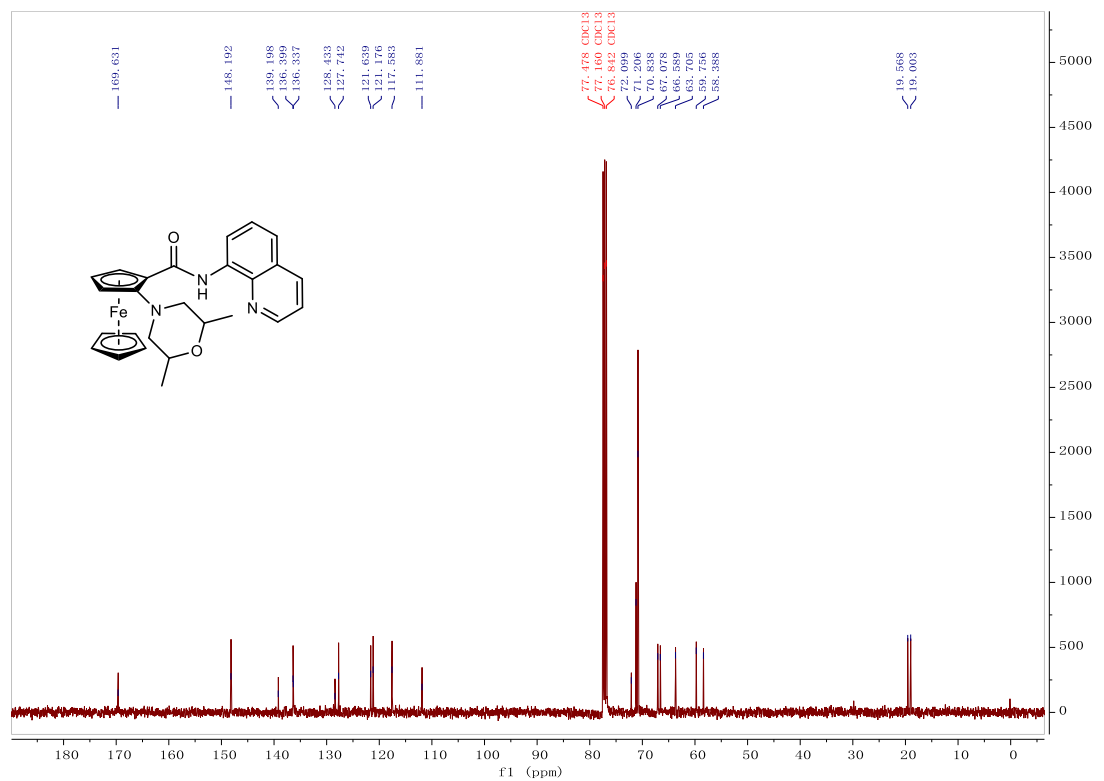

# **4b-<sup>1</sup>H NMR**

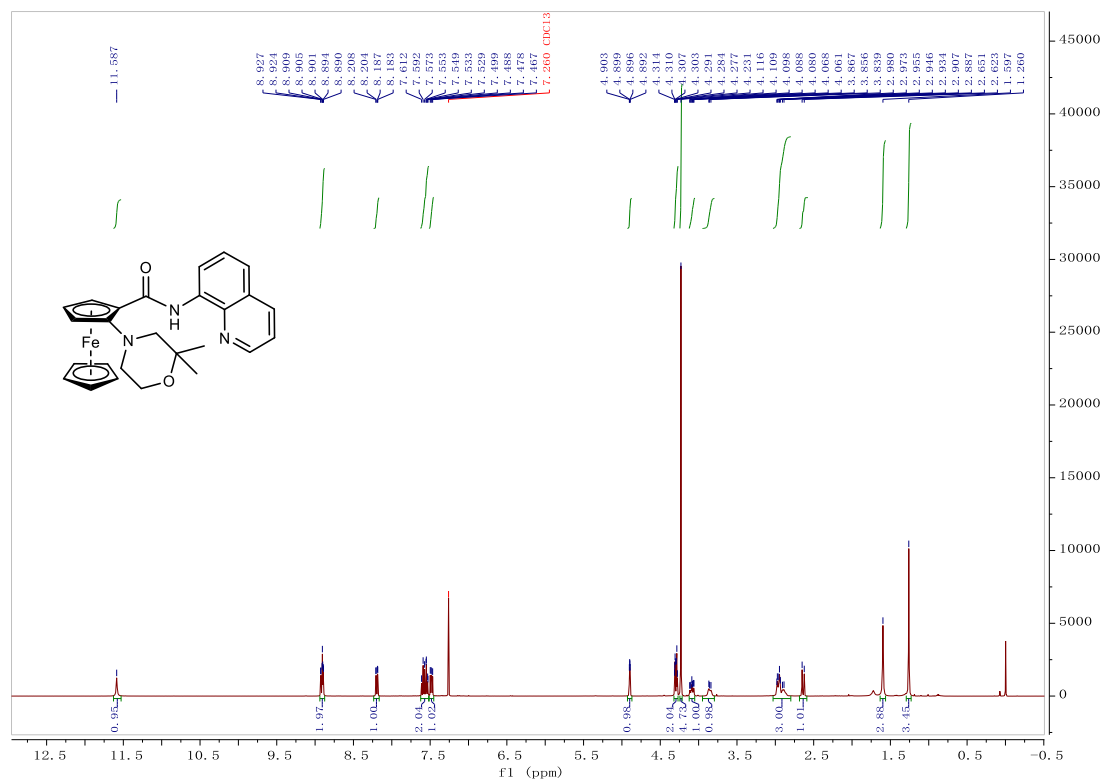

# **4b-<sup>13</sup>C NMR**

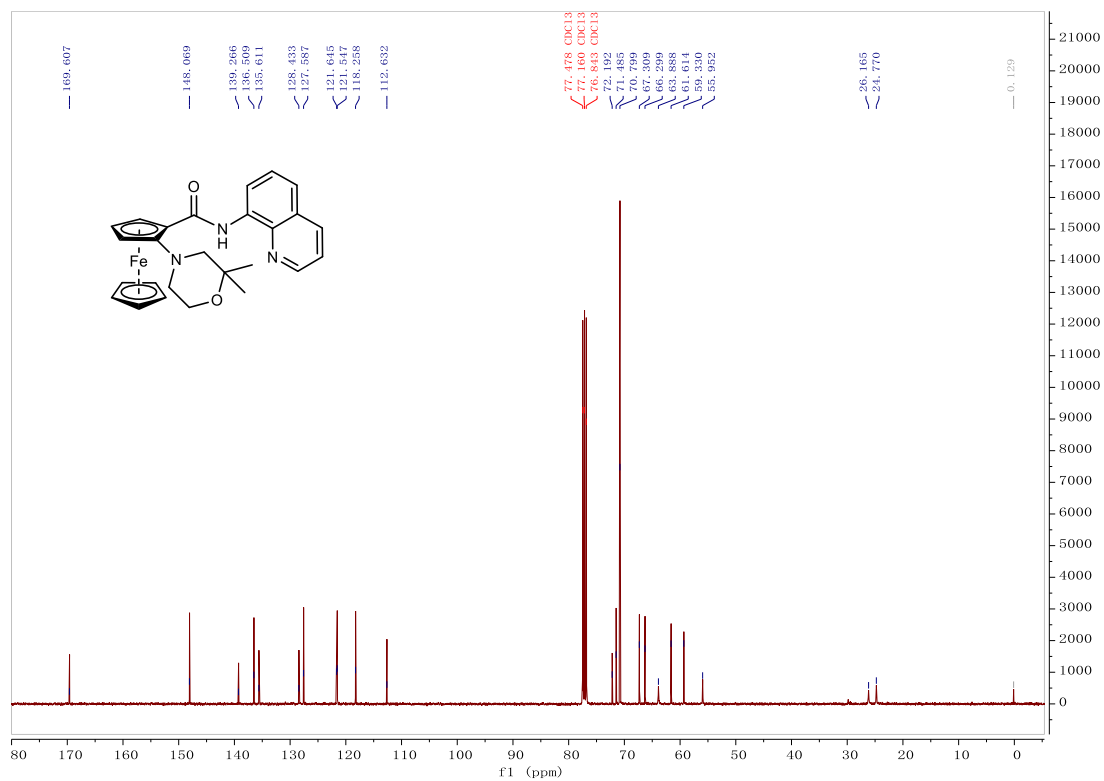

# **4c-<sup>1</sup>H NMR**

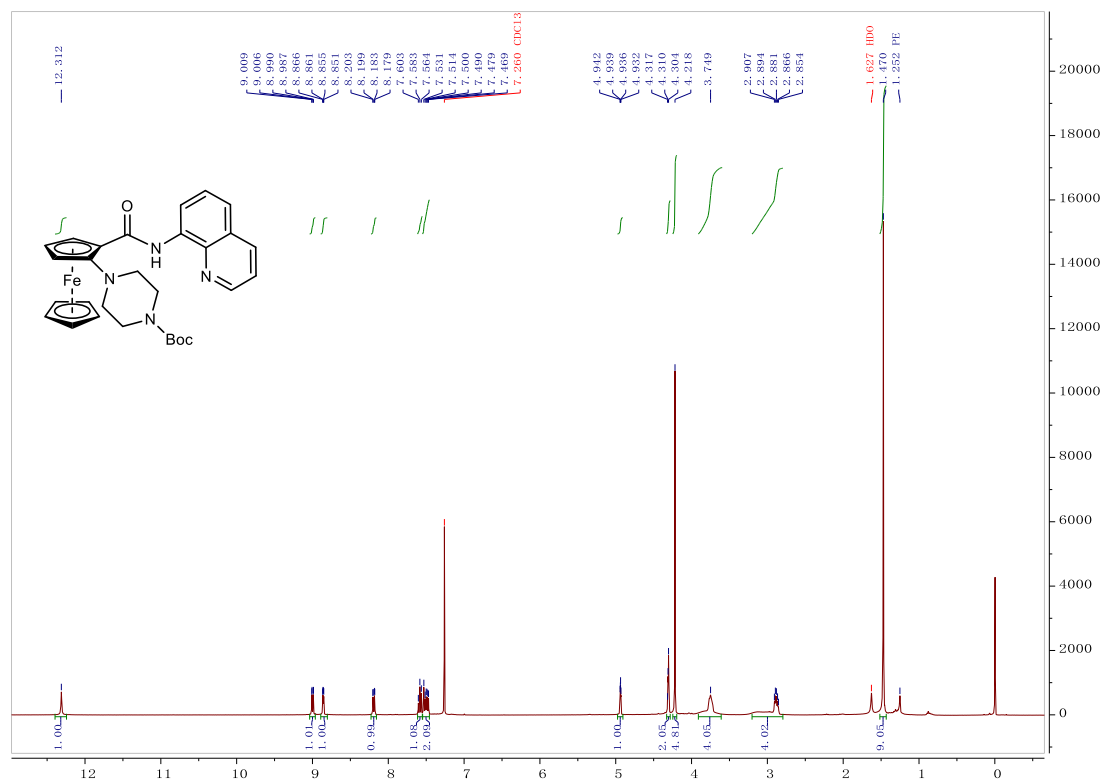

# **4c-<sup>13</sup>C NMR**

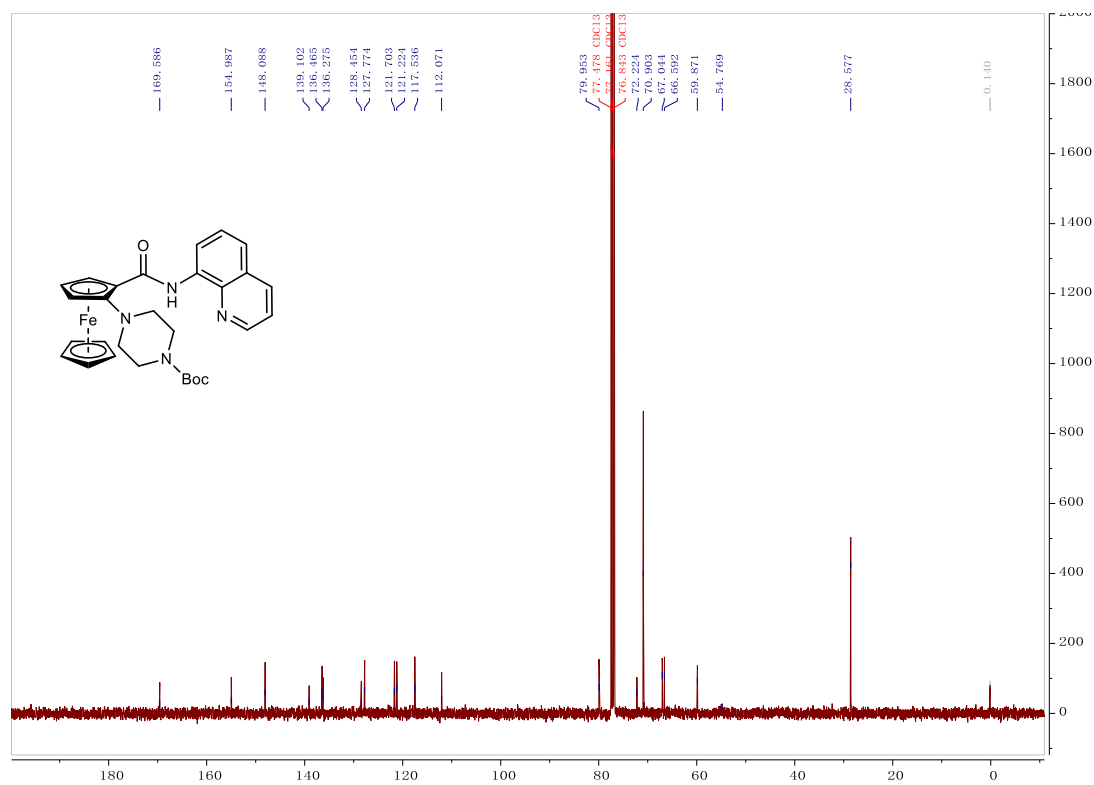

# 4d-<sup>1</sup>H NMR

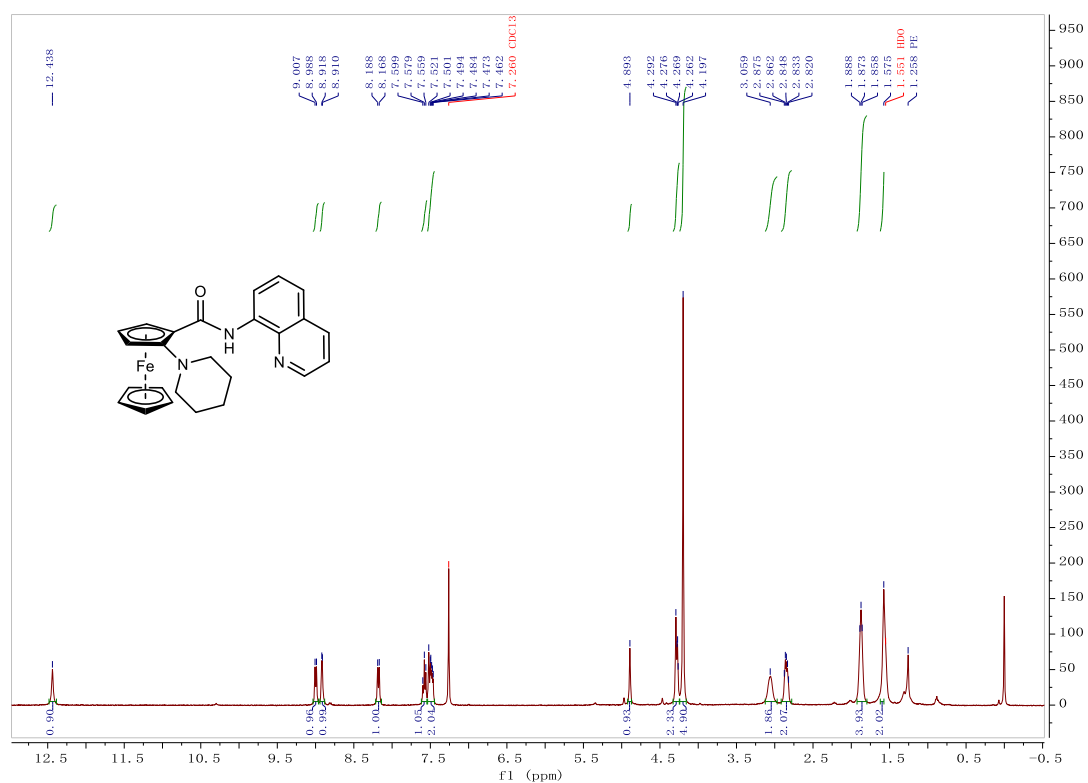

# 4d-<sup>13</sup>C NMR

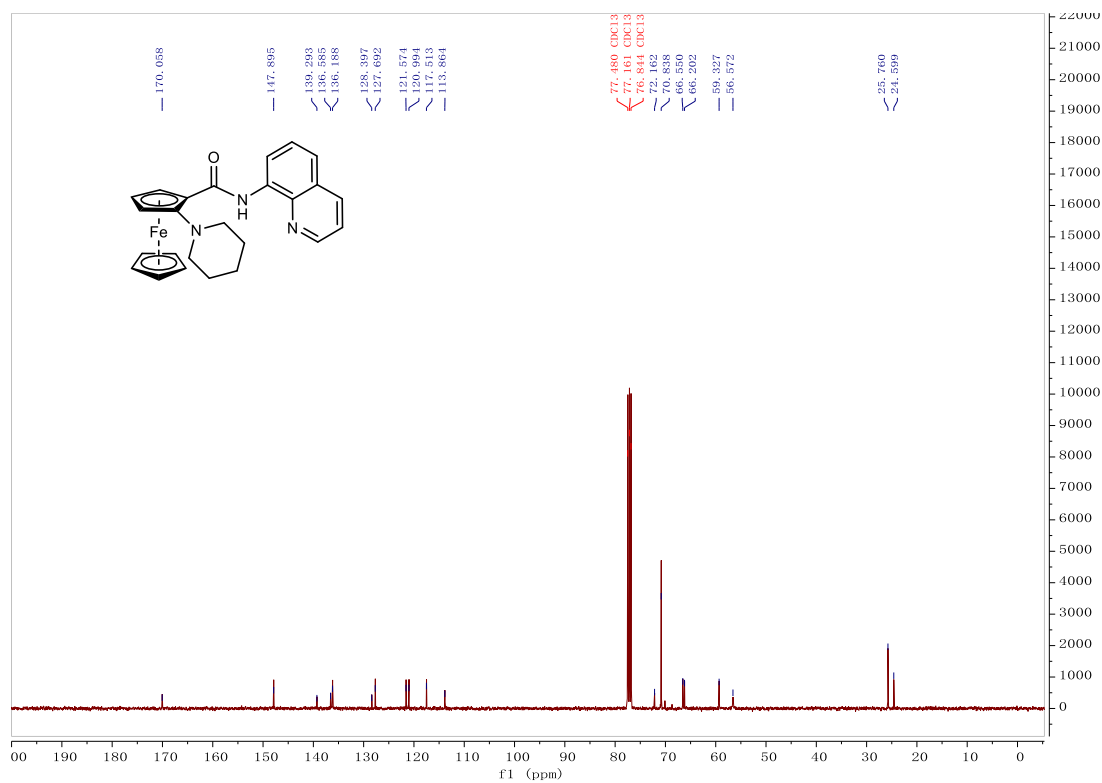

# **4e-<sup>1</sup>H NMR**

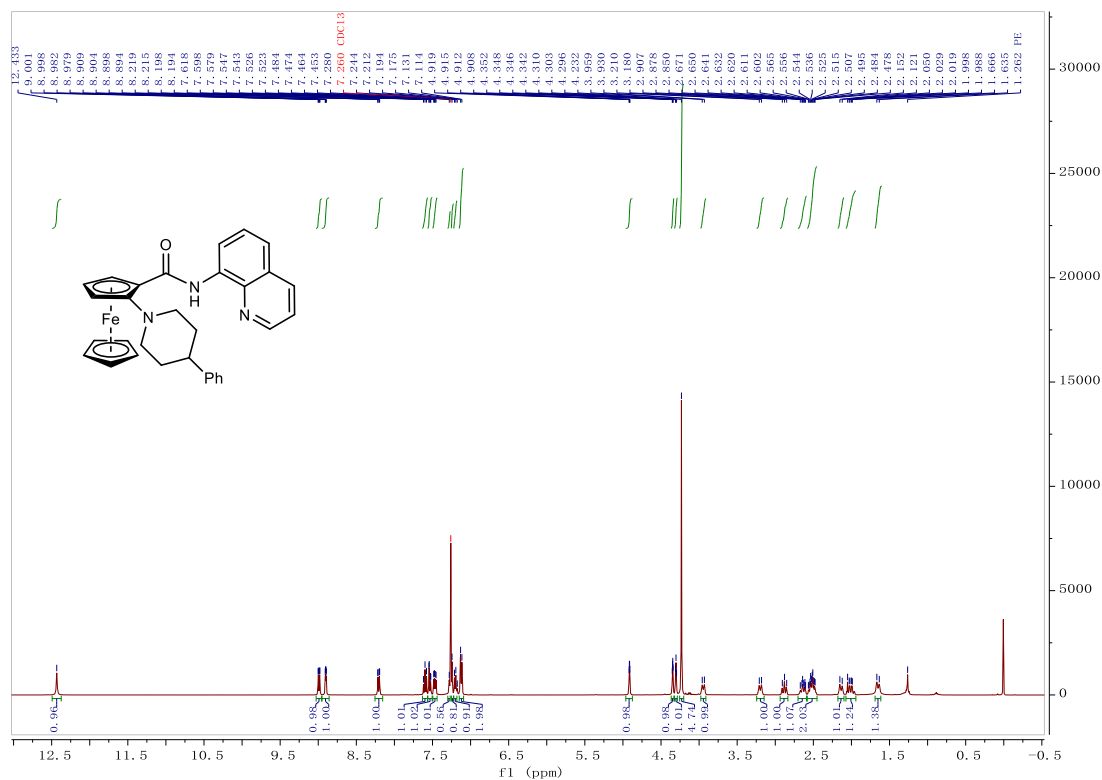

# **4e-<sup>13</sup>C NMR**

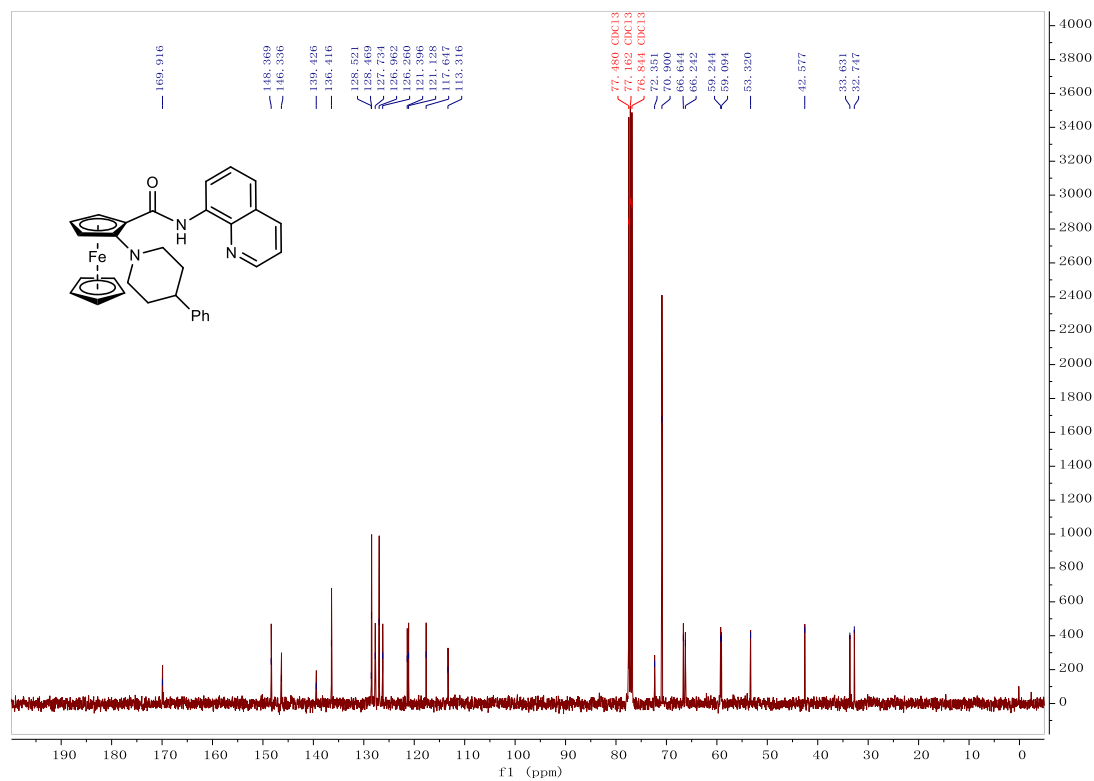

# 4f-<sup>1</sup>H NMR

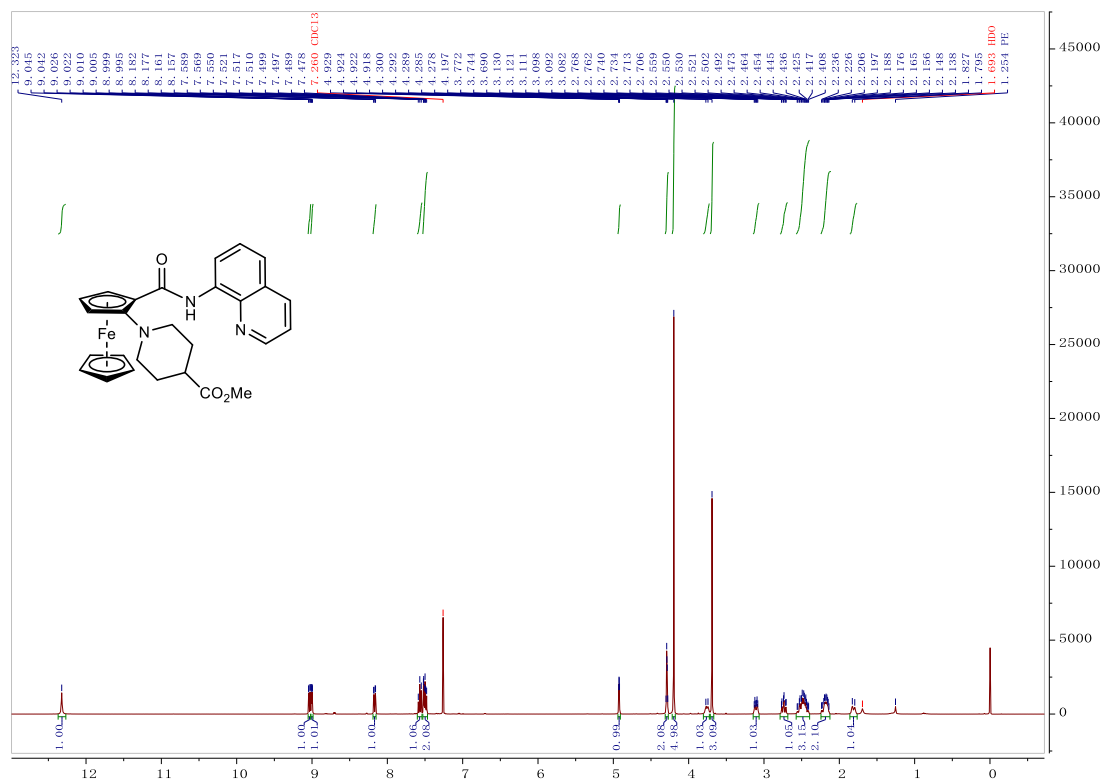

# 4f-<sup>13</sup>C NMR

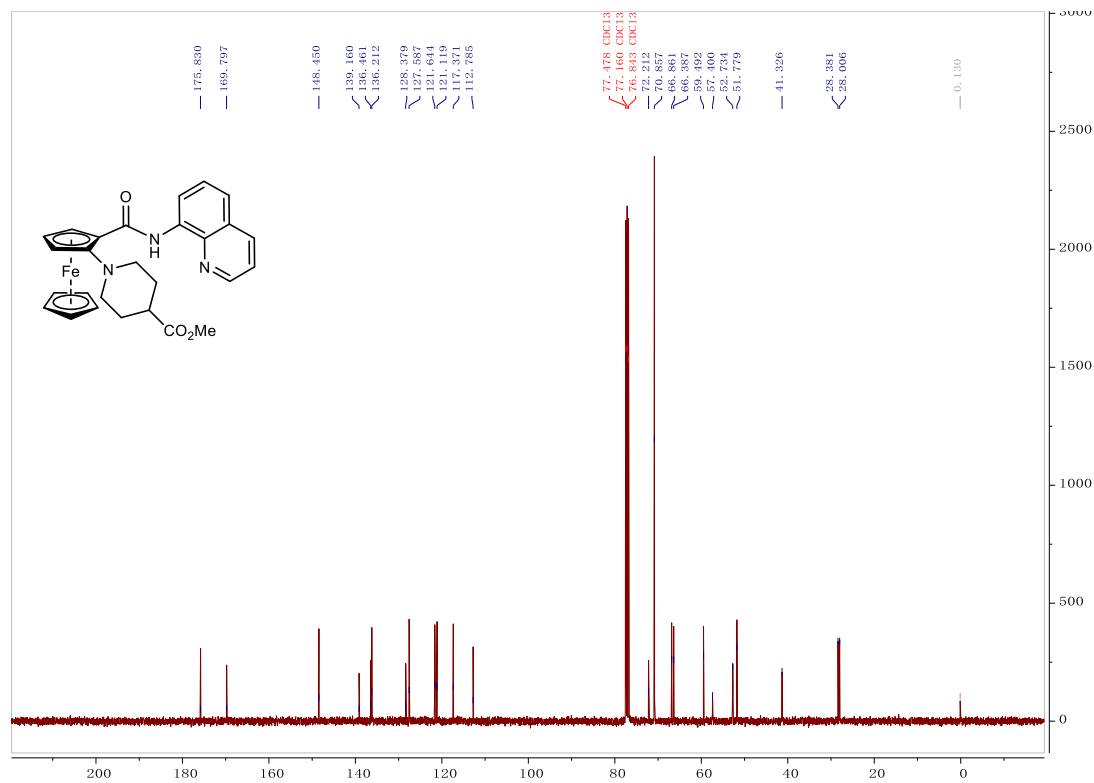

# 4g-<sup>1</sup>H NMR

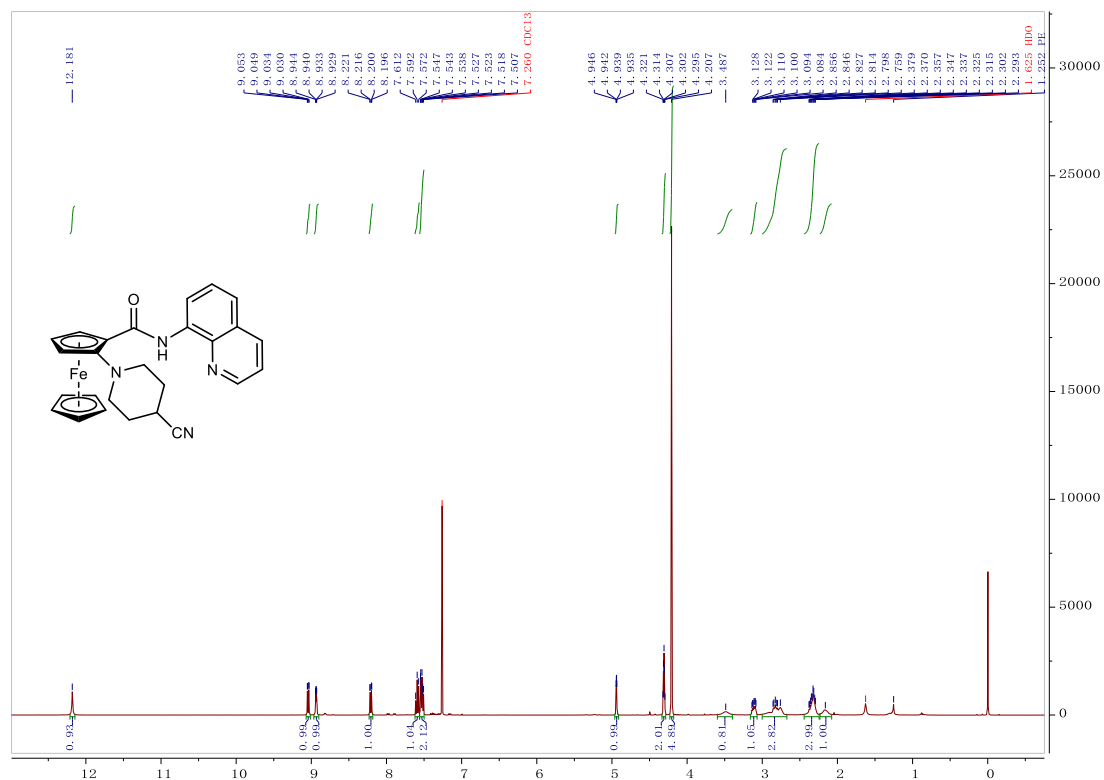

# 4g-<sup>13</sup>C NMR

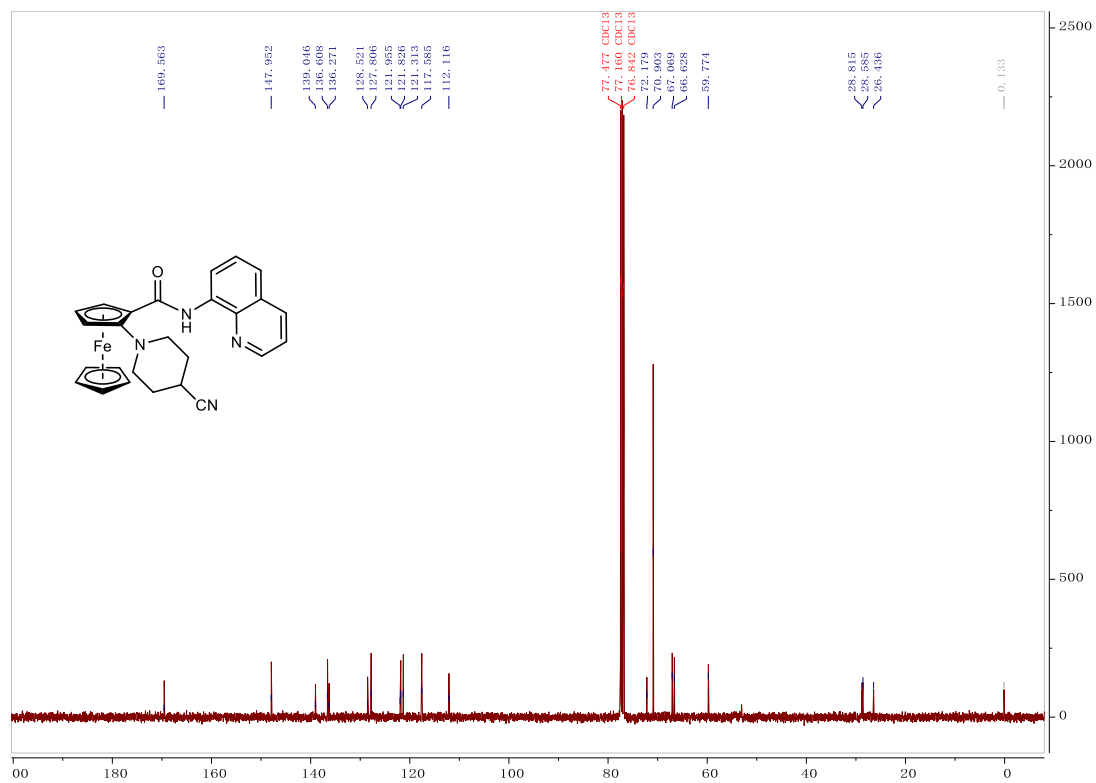

# 4h-<sup>1</sup>H NMR

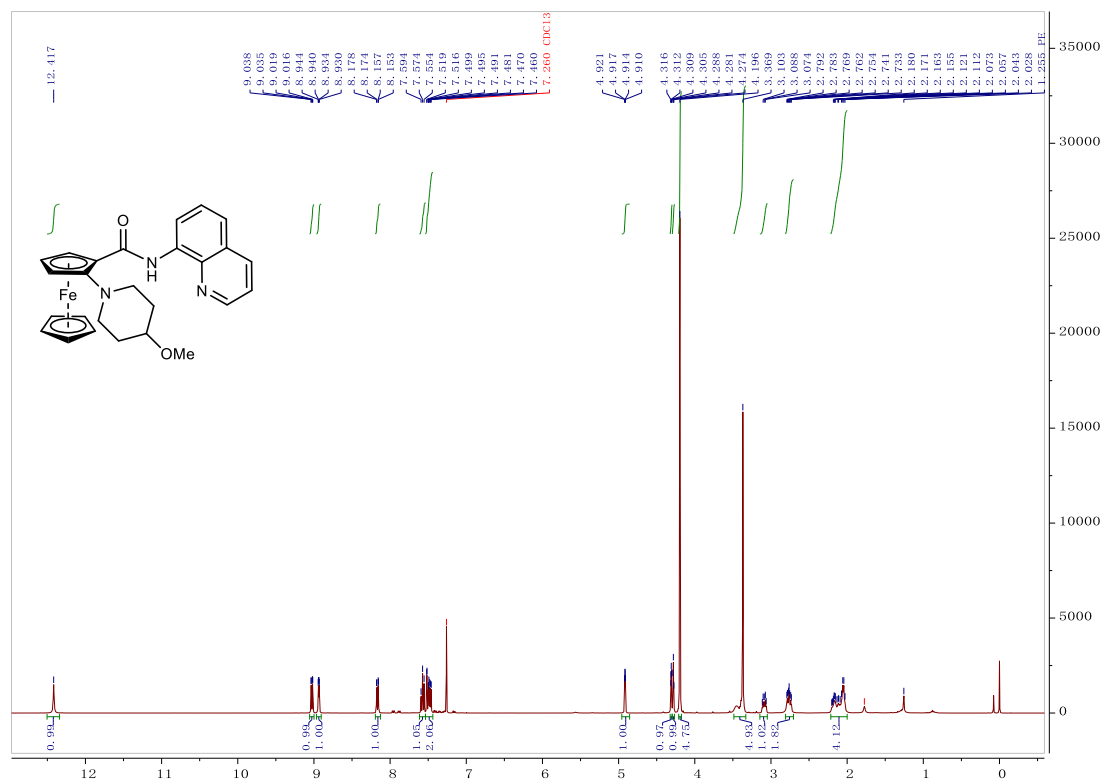

# 4h-<sup>13</sup>C NMR

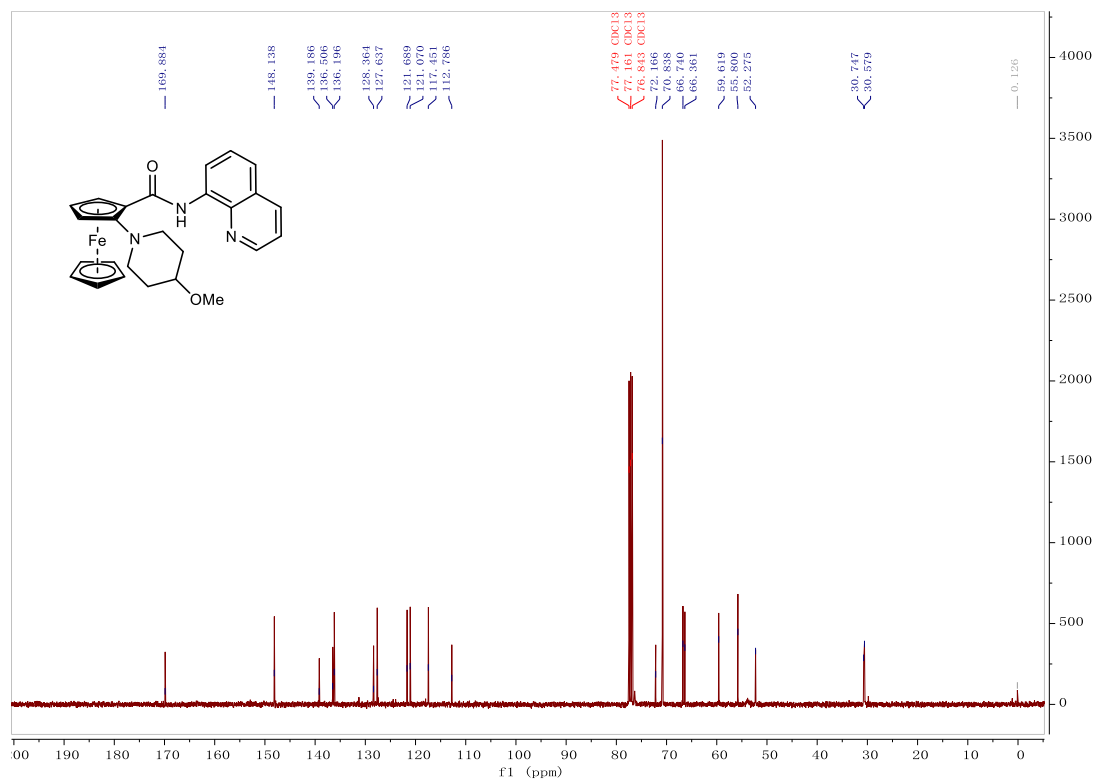



# **4i-<sup>1</sup>H NMR**

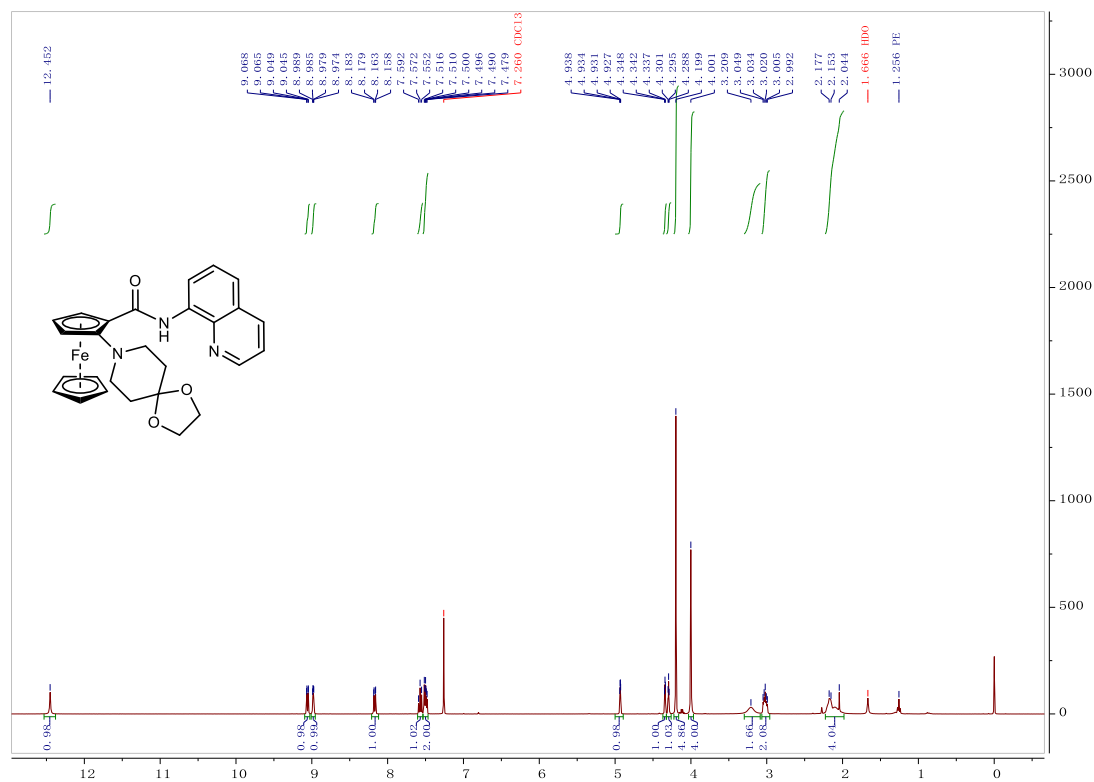

# **4i-<sup>13</sup>C NMR**

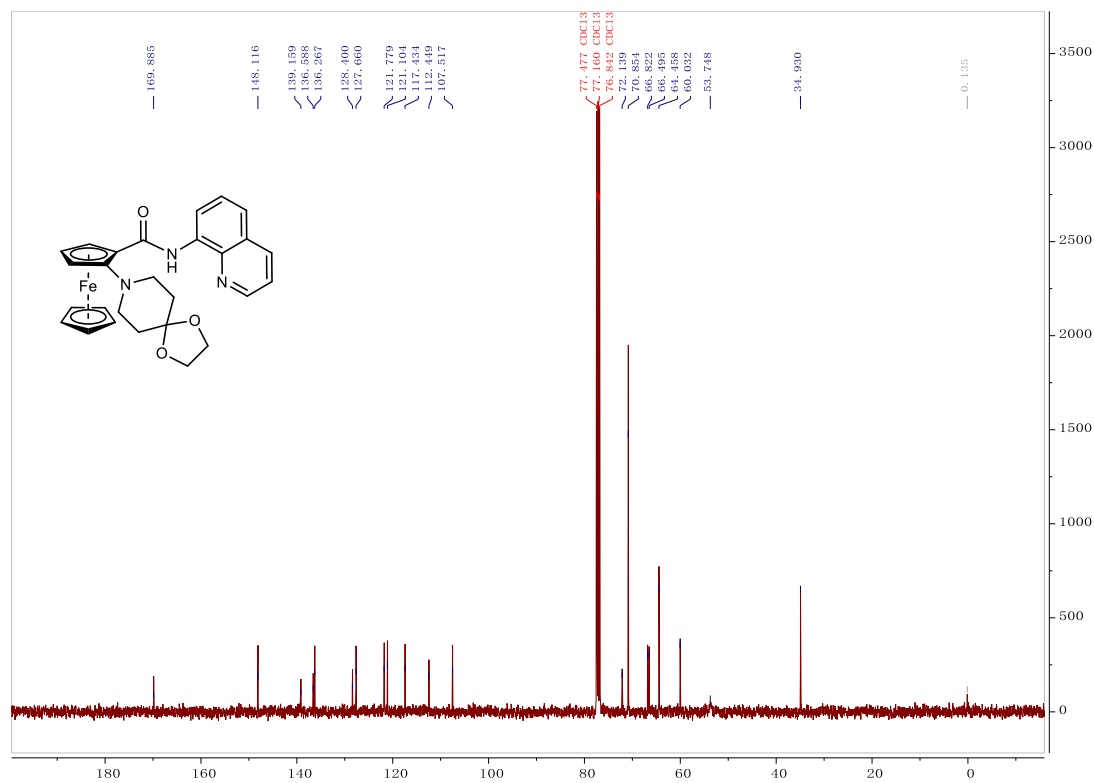

# 4j-<sup>1</sup>H NMR

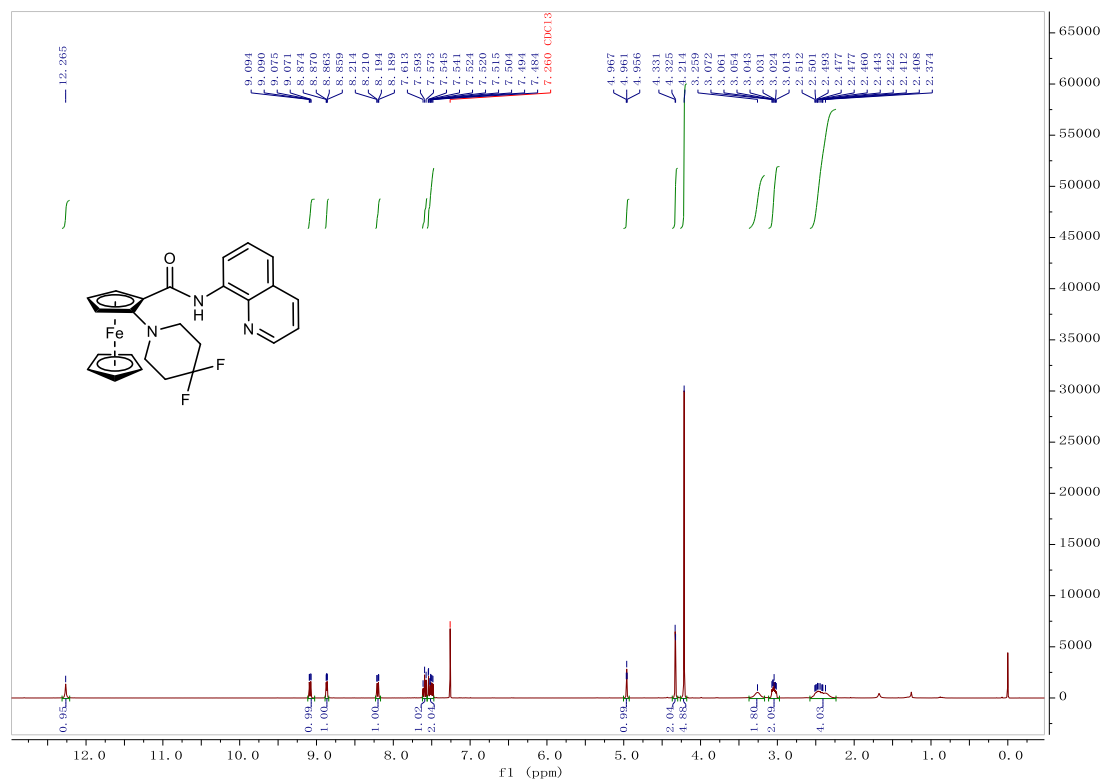

# 4j-<sup>13</sup>C NMR

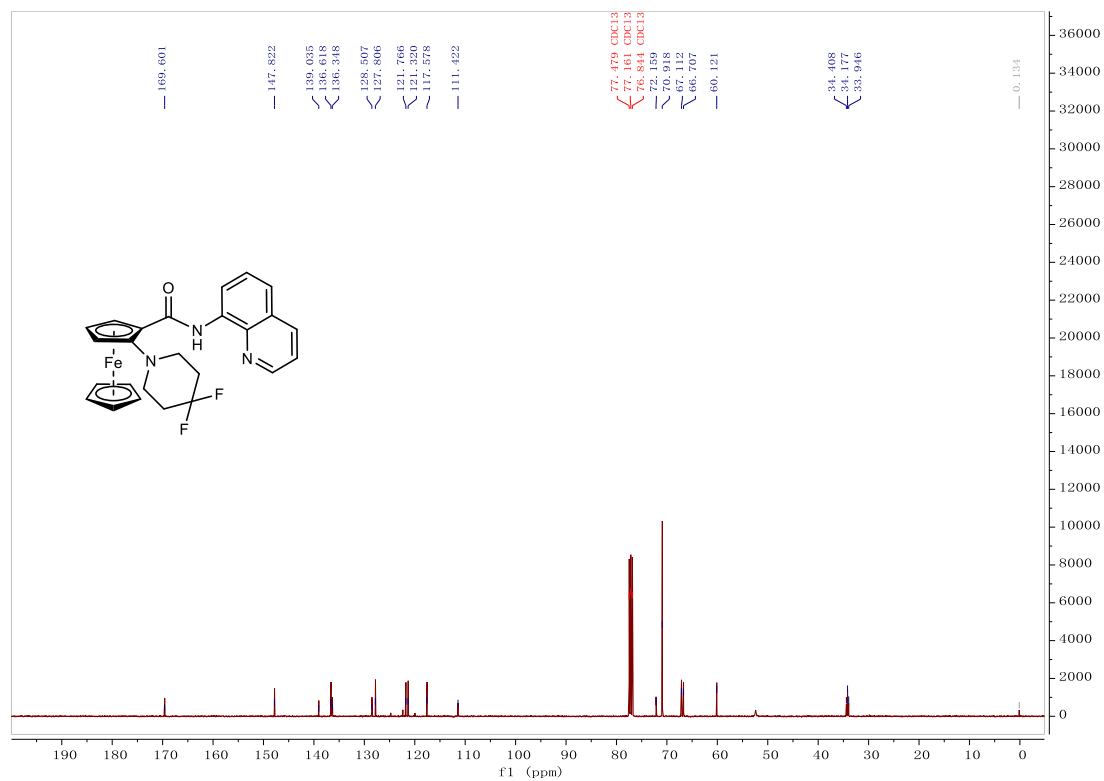

Chemical structure of compound 10 is shown. The  $^{13}\text{C}$  NMR spectrum (CDCl<sub>3</sub>) shows peaks at the following chemical shifts (ppm): 169.131, 147.680, 139.272, 138.454, 136.204, 135.833, 131.943, 128.609, 128.211, 127.551, 126.739, 124.602, 121.535, 121.398, 121.227, 119.149, 117.658, 114.968, 77.476 (CDCl<sub>3</sub>), 76.841 (CDCl<sub>3</sub>), 74.816, 74.583, 67.591, 67.020, 65.223, 53.583, 27.771, and 22.833.

#### 4l-<sup>1</sup>H NMR

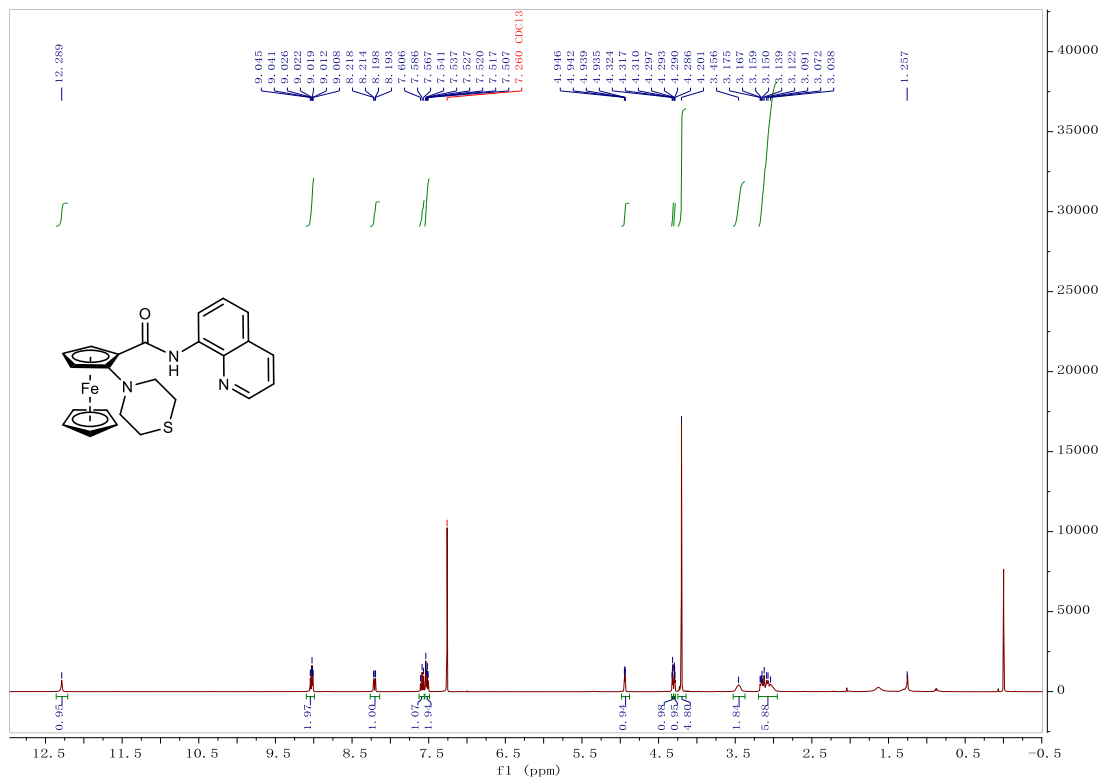

## 4I-<sup>13</sup>C NMR

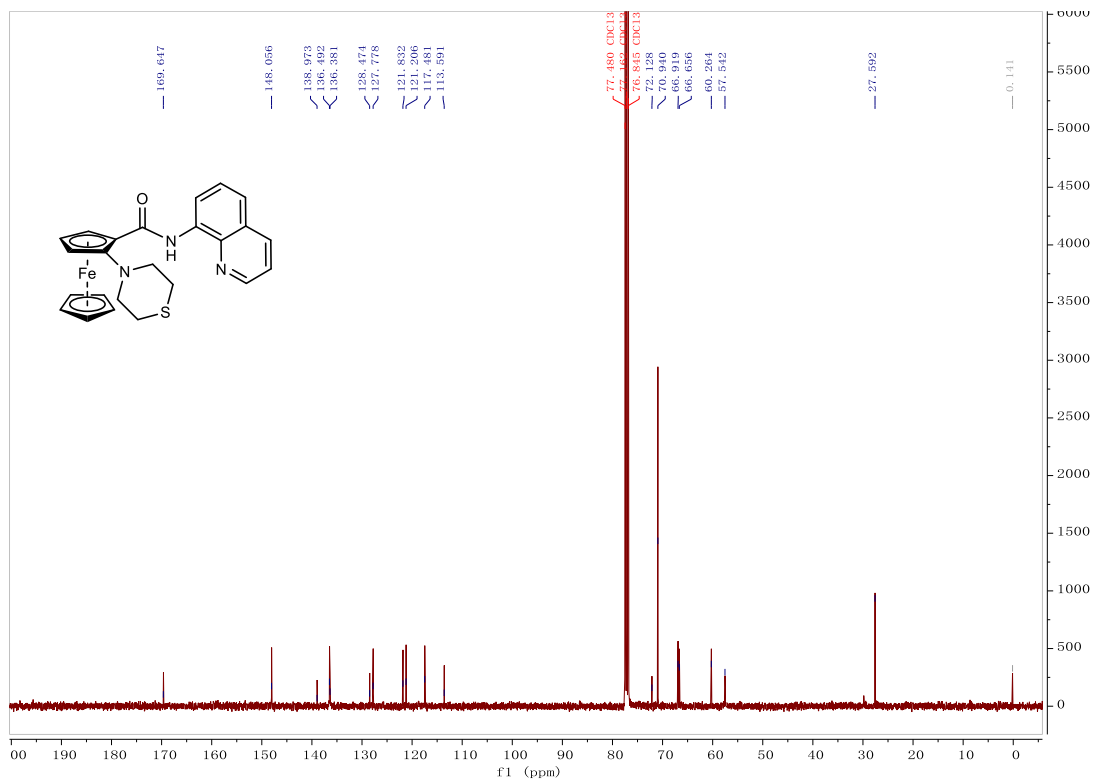

# 4m-<sup>1</sup>H NMR

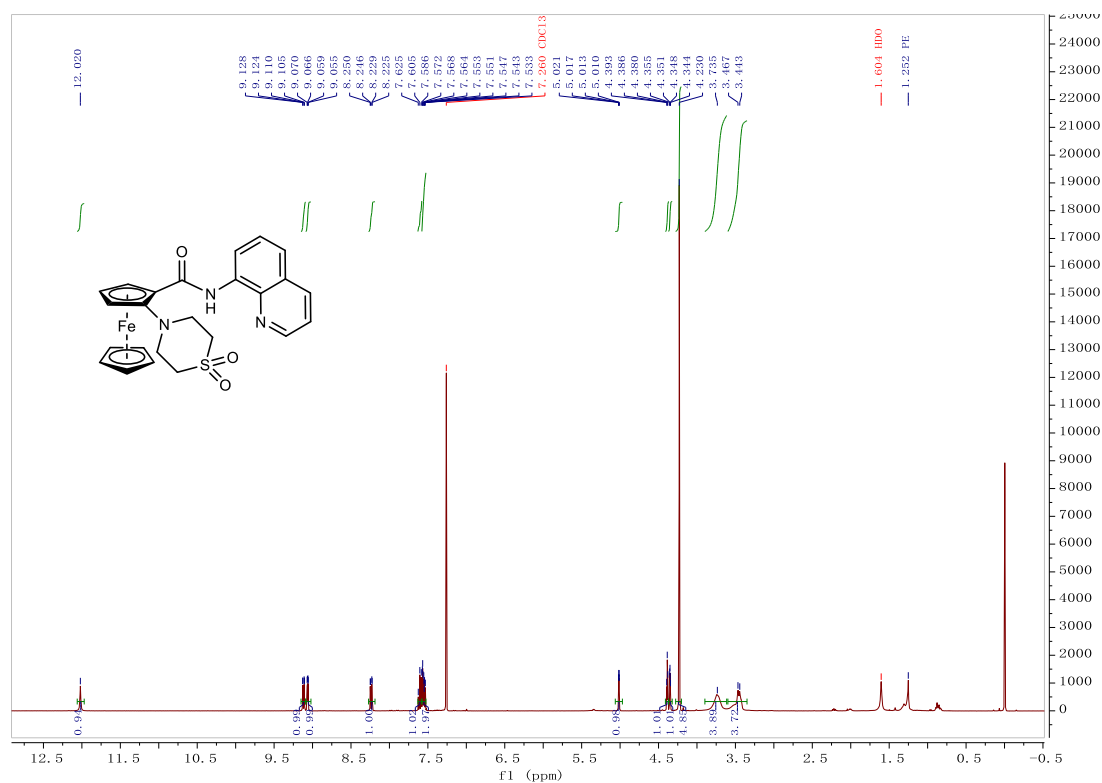

# 4m-<sup>13</sup>C NMR

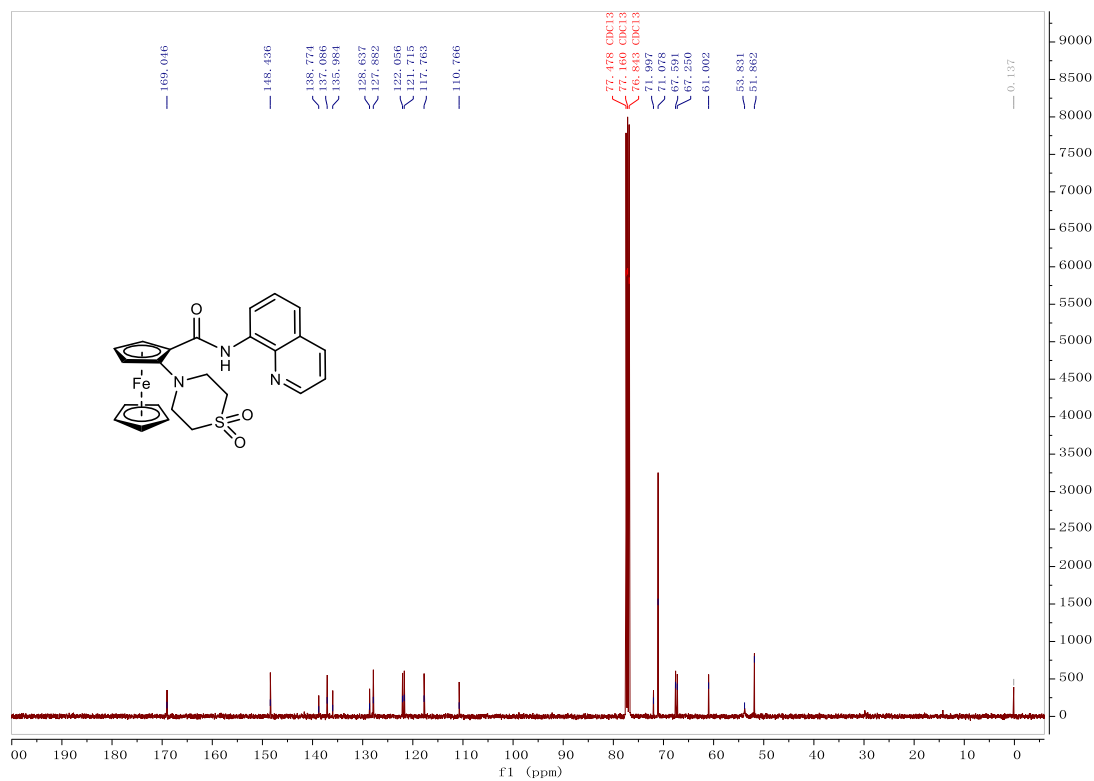

# **4n-<sup>1</sup>H NMR**

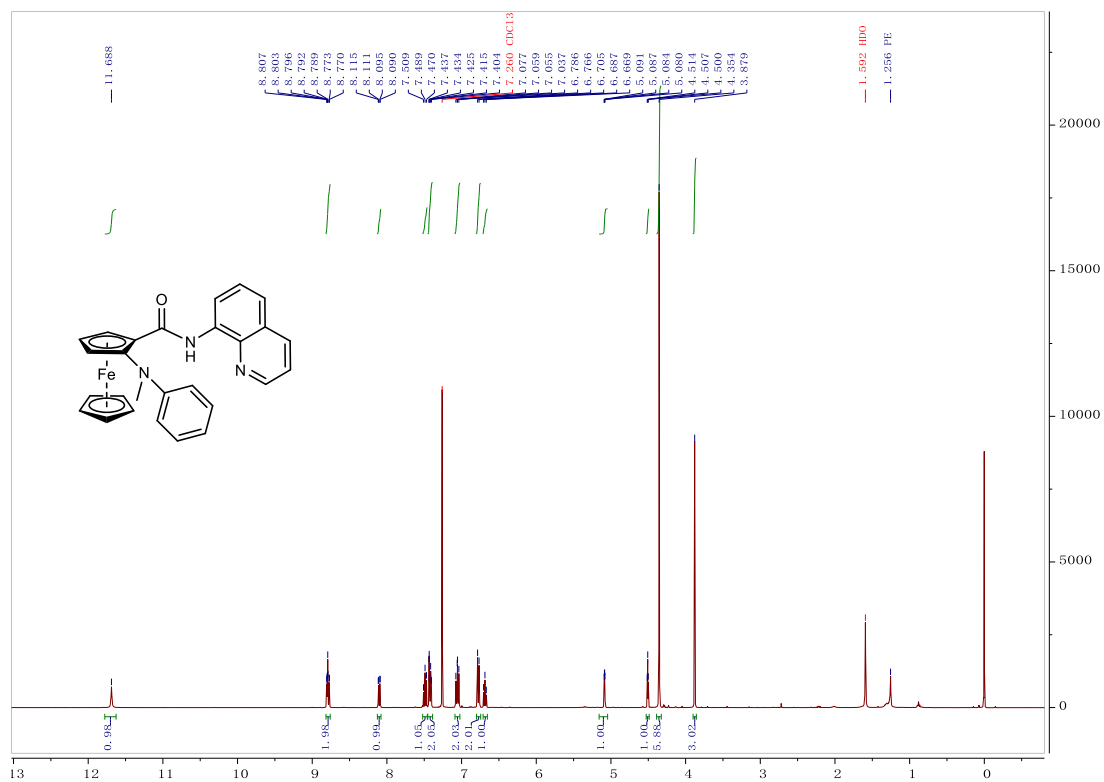

# **4n-<sup>13</sup>C NMR**

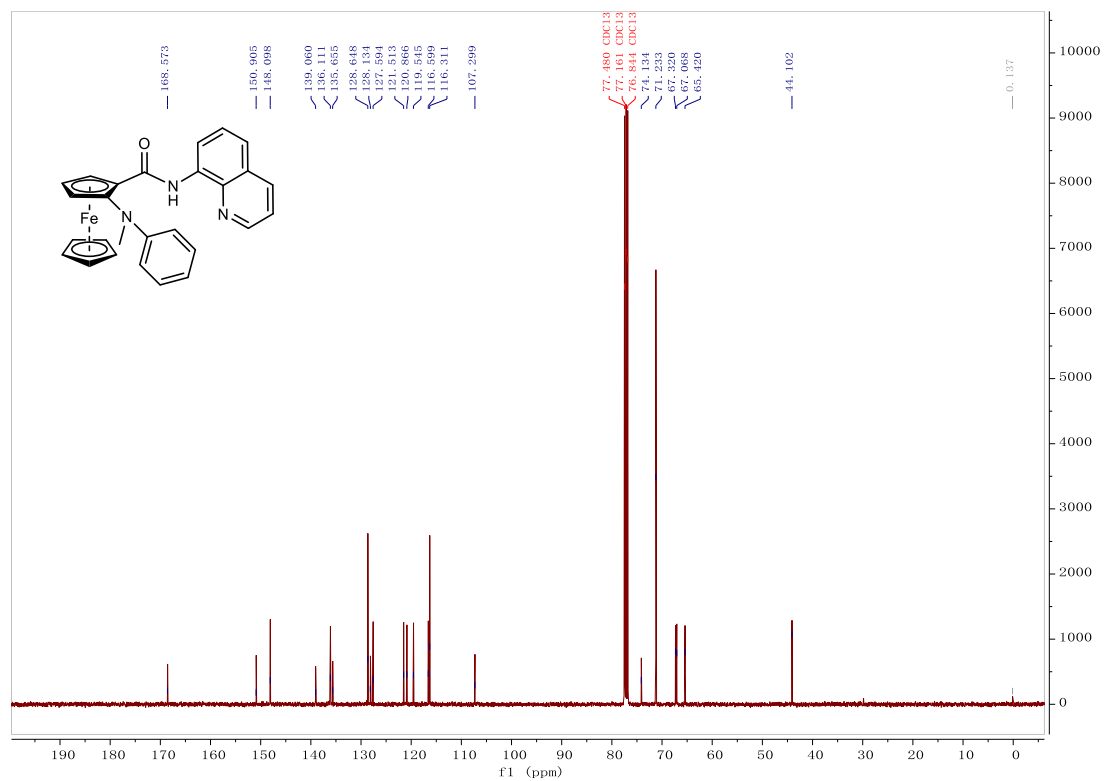

# **4o-<sup>1</sup>H NMR**

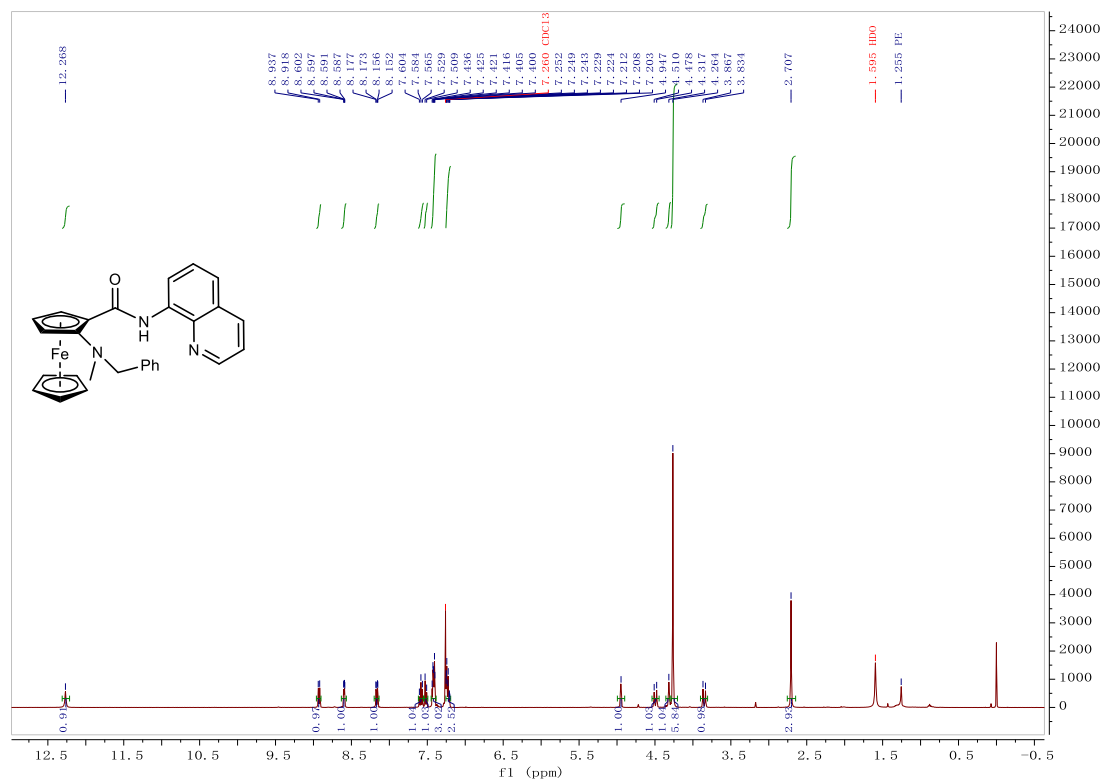

# **4o-<sup>13</sup>C NMR**

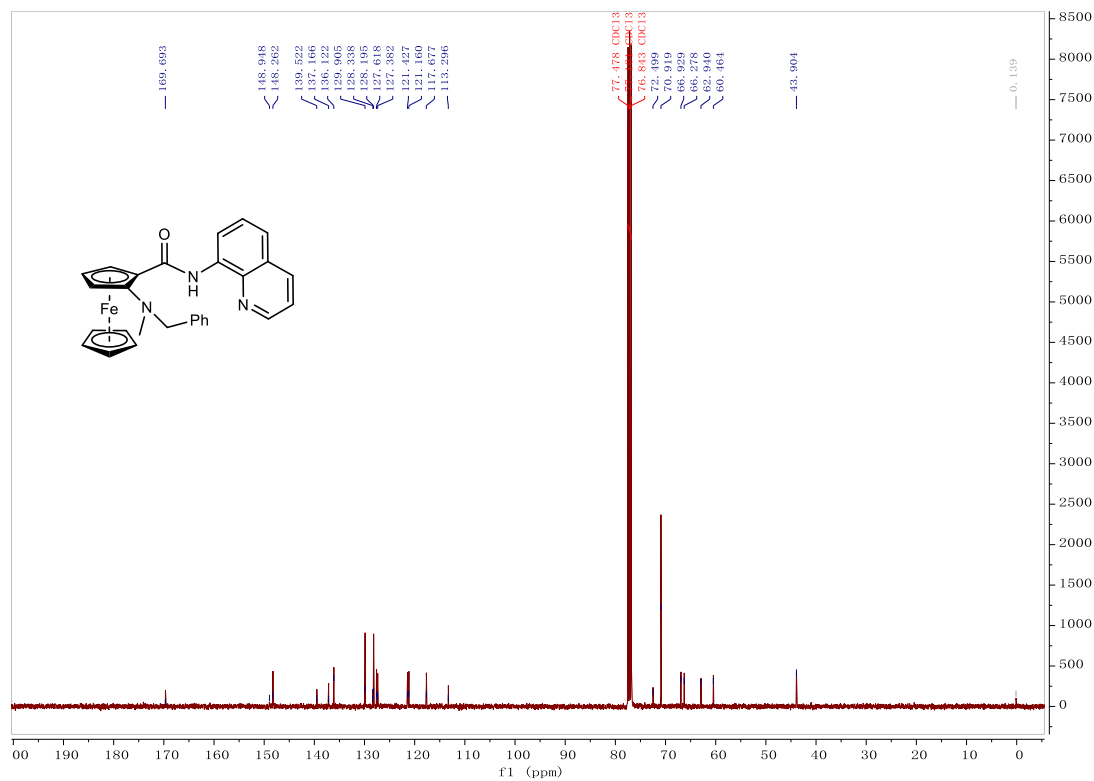

# 4p-<sup>1</sup>H NMR

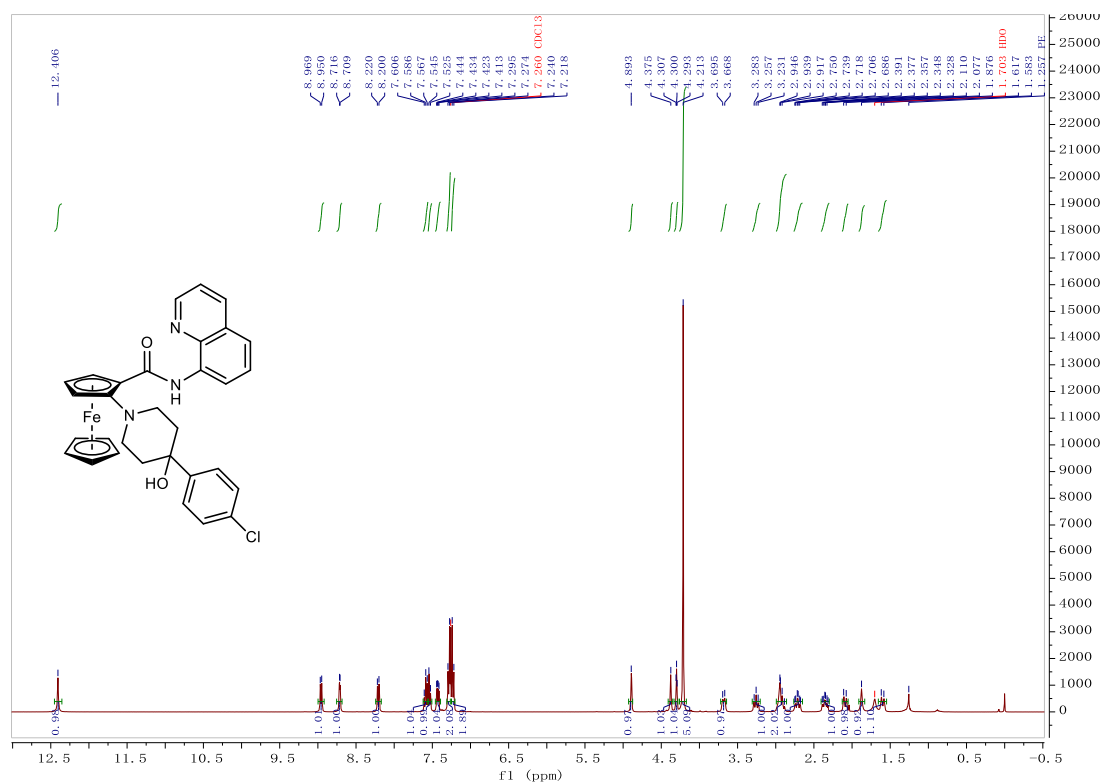

# 4p-<sup>13</sup>C NMR

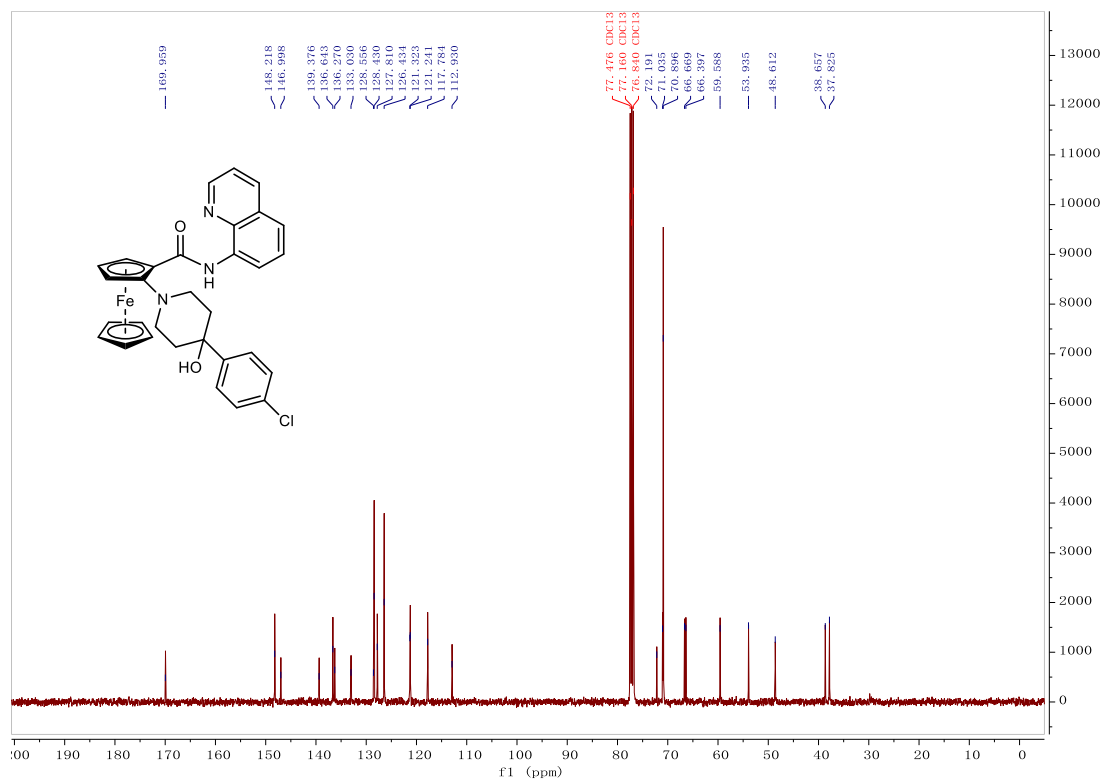



# 4q-<sup>1</sup>H NMR

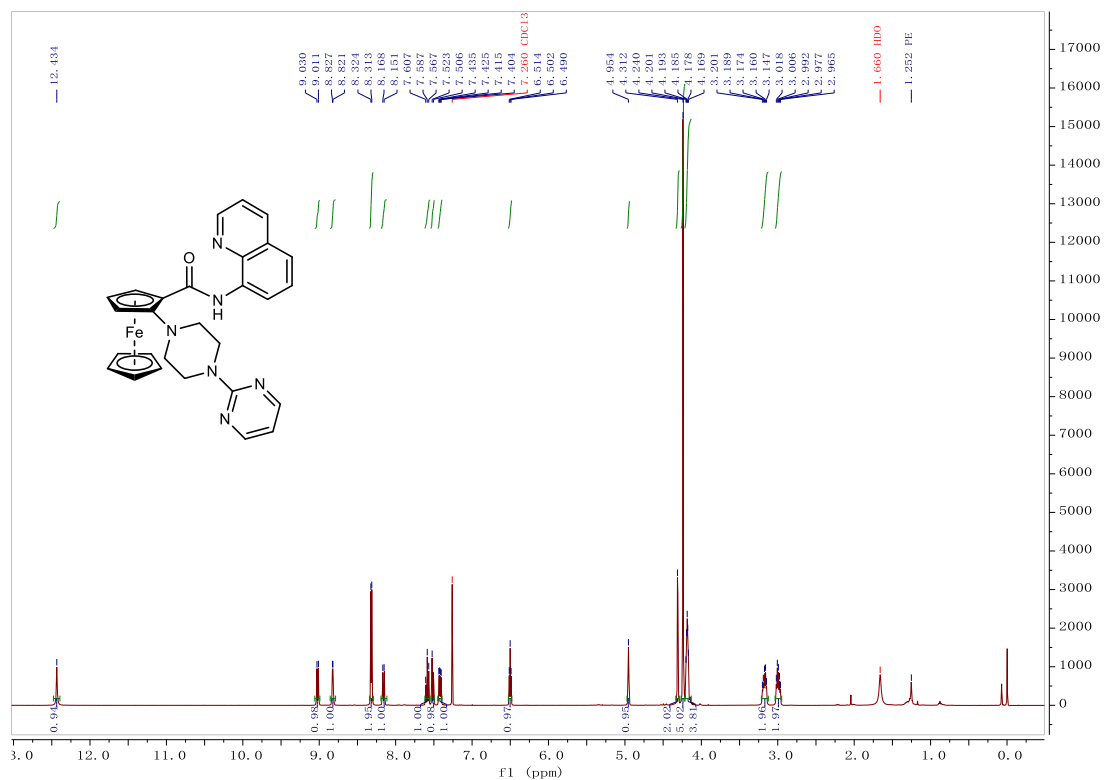

# 4q-<sup>13</sup>C NMR

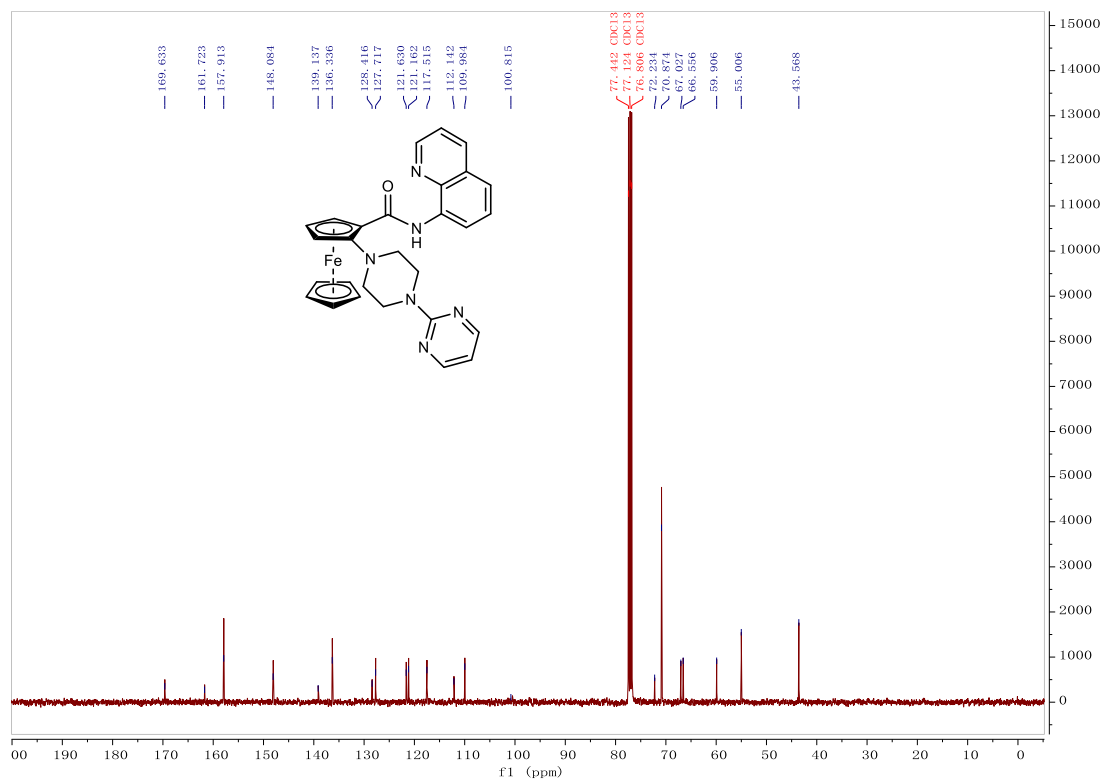

### 4r-<sup>1</sup>H NMR

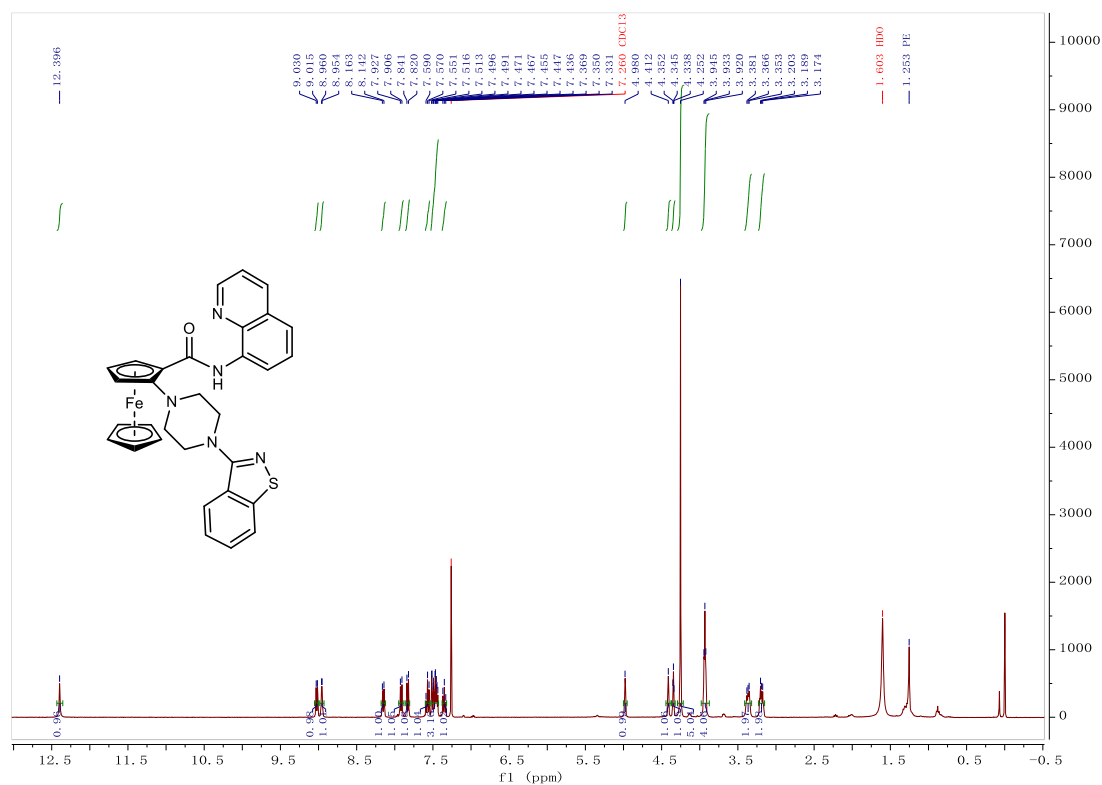

#### 4r-<sup>13</sup>C NMR

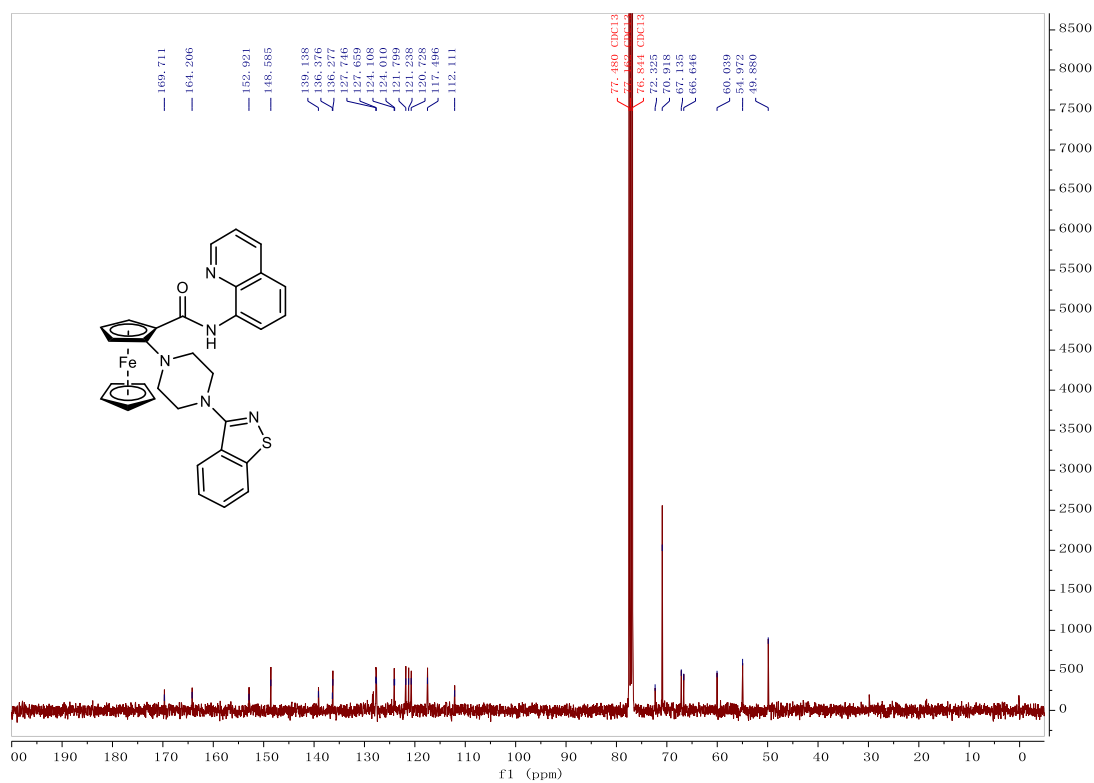

## 5-<sup>1</sup>H NMR

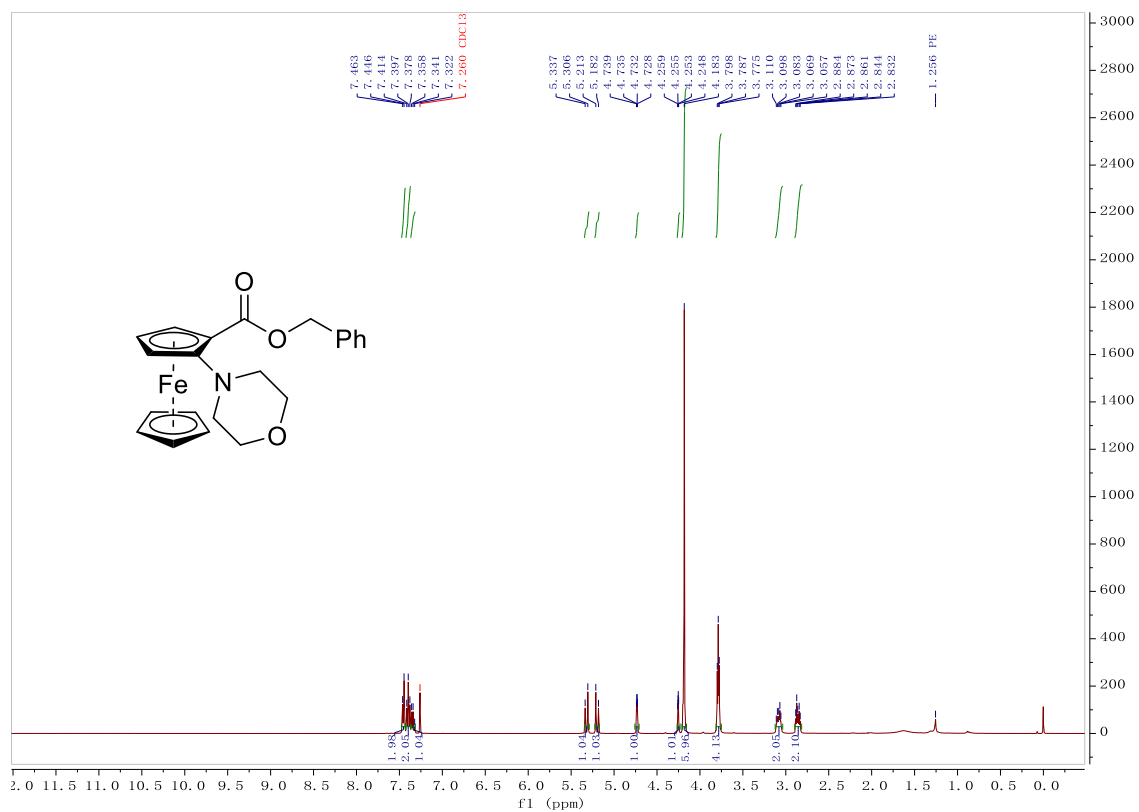

## 5-<sup>13</sup>C NMR

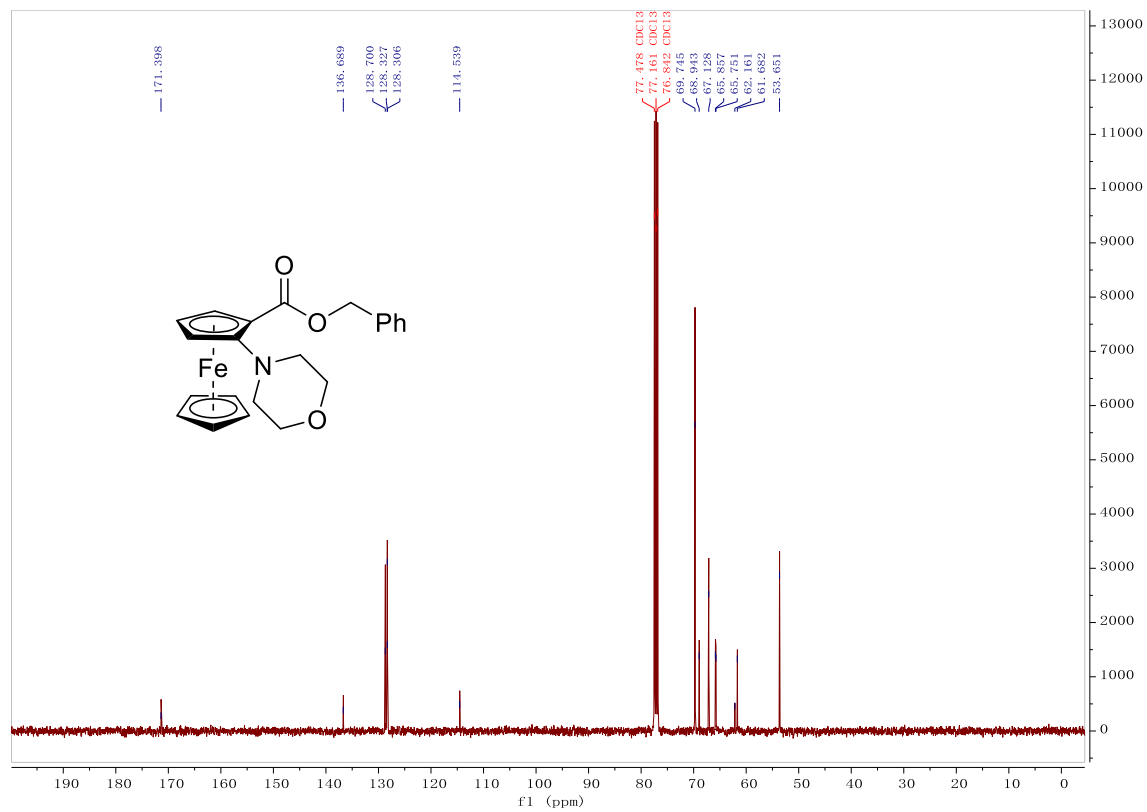

Supplement: Additional file 1 [file 1860-5397-17-165-S1.pdf]
